# Supplementary material for: Transcriptomic Insights Into the Growth Phase- and Sugar-Associated Changes in the Exopolysaccharide Production of a High EPS-Producing Streptococcus thermophilus ASCC 1275
Source: Front Microbiol. 2018 Aug 20;9:1919. doi: 10.3389/fmicb.2018.01919 (PMC6109772; doi:10.3389/fmicb.2018.01919)
Supplement: Supplementary file 1 [file Data_Sheet_1.XLSX]

## Sheet: Table S1
Table S1 Gene expression level of S. thermophilus ASCC 1275 in nine conditions
Gene ID	Gene name	Locus	Length	G5h_FPKM	G10h_FPKM	S5h_FPKM	S10h_FPKM	L5h_FPKM	L10h_FPKM
T303_00005	DNA-binding protein	Chromosome:29-1079	1050	104.719	104.865	546.875	320.274	637.491	606.66
T303_00010	preprotein translocase subunit YidC	Chromosome:1090-1897	807	65.8914	68.1213	378.007	198.403	420.646	349.162
T303_00015	rnpA; ribonuclease P	Chromosome:2011-2347	336	28.3074	42.4018	266.498	91.775	300.01	216.802
T303_00020	argininosuccinate lyase	Chromosome:2431-3907	1476	12.8742	9.48956	27.3296	24.663	217.26	37.1499
T303_00025	argininosuccinate synthase	Chromosome:4153-5353	1200	45.5141	62.2773	227.808	107.543	1005.6	35.9172
T303_00030	glutamyl-tRNA synthase	Chromosome:6254-7709	1455	96.7669	84.2383	532.703	216.404	507.21	283.512
T303_00040	50S ribosomal protein L1	Chromosome:9036-9726	690	988.78	1555.02	4785.2	2122.32	6292.02	4420.49
T303_00045	50S ribosomal protein L11	Chromosome:9825-10251	426	621.244	1125.67	3661.26	1627.97	4829.71	3385.52
T303_00050	Integral membrane protein	Chromosome:10422-10776	354	388.252	96.2916	179.724	195.032	194.183	91.3419
T303_00055	carbonic anhydrase	Chromosome:10867-11365	498	451.74	250.189	2180	691.737	1716.54	1294.82
T303_00065	hypothetical protein	Chromosome:12086-12203	117	270.918	264.29	123.898	750.588	216.695	73.7997
T303_00070	DNA repair protein RadA	Chromosome:12291-13509	1218	224.73	225.307	244.298	267.272	220.843	340.252
T303_00075	dut; dUTPase	Chromosome:13830-14277	447	148.573	185.421	172.117	221.504	123.44	227.499
T303_00095	membrane-bound protein	Chromosome:17279-17735	456	115.067	181.237	55.5747	164.399	91.0551	268.366
T303_00100	NAD(P)H-dependent glycerol-3-phosphate dehydrogenase	Chromosome:17967-18990	1023	241.914	333.477	525.699	417.443	584.553	658.748
T303_00105	UDP-glucose pyrophosphorylase	Chromosome:19008-19923	915	427.86	644.846	788.733	885.952	855.809	1041.39
T303_00110	membrane protein	Chromosome:19968-21161	1193	221.975	160.953	157.777	216.578	141.777	172.2
T303_00115	5-formyltetrahydrofolate cyclo-ligase	Chromosome:19968-21161	1193	263.023	145.264	211.251	225.909	182.642	159.703
T303_00120	N-acetyldiaminopimelate deacetylase	Chromosome:21229-22363	1134	44.0281	34.9492	82.7675	45.0913	123.076	52.621
T303_00125	2,3,4,5-tetrahydropyridine-2,6-carboxylate N-succinyltransferase	Chromosome:22441-23125	684	21.2073	22.5591	430.414	63.6258	555.819	158.726
T303_00130	hypothetical protein	Chromosome:23226-23996	770	10.9732	6.53209	5.19584	10.7092	9.29004	19.4296
T303_00135	haloacid dehalogenase	Chromosome:23226-23996	770	9.91357	5.24834	3.77419	7.92719	6.64672	14.1004
T303_00140	rRNA (guanine-N1)-methyltransferase	Chromosome:24095-24929	834	35.816	33.3538	132.522	74.3504	140.959	106.875
T303_00150	hypothetical protein	Chromosome:25542-25806	264	1.19427	1.04924	2.54352	3.74335	6.40955	9.42198
T303_00155	cytidine/deoxycytidylate deaminase	Chromosome:25886-26405	519	7.37188	10.7488	35.146	27.3125	93.2203	124.627
T303_00160	single-stranded DNA-binding protein	Chromosome:27163-27556	393	12.4733	13.077	45.0661	25.2307	266.455	31.3075
T303_00165	oxidoreductase	Chromosome:27761-27989	228	11.426	17.3031	30.558	22.791	189.214	36.9105
T303_00170	3-isopropylmalate dehydratase large subunit	Chromosome:28003-29035	1032	11.4885	11.9455	30.1905	19.0058	212.949	26.08
T303_00175	tRNA-binding protein	Chromosome:29171-29795	624	215.554	102.734	337.722	142.02	438.232	366.505
T303_00180	thioredoxin	Chromosome:29804-30409	605	147.607	67.3594	207.382	87.8318	266.452	221.473
T303_00185	membrane protein	Chromosome:29804-30409	605	206.584	92.5336	337.162	116.41	445.587	276.357
T303_00190	glutamyl aminopeptidase	Chromosome:30499-31567	1068	389.085	305.262	137.512	529.767	149.054	293.633
T303_00195	pyrroline-5-carboxylate reductase	Chromosome:31582-32353	771	495.642	520.662	141.873	911.522	157.806	326.548
T303_00200	CAAX amino terminal protease	Chromosome:32382-33045	663	1106.98	1366.18	1044.89	1427.16	1473.44	592.287
T303_00205	CAAX amino terminal protease	Chromosome:33141-33585	444	43.1062	60.9976	5.55693	80.2901	7.96395	20.6136
T303_00210	CAAX amino terminal protease	Chromosome:33658-34138	480	30.7581	40.1375	4.45909	58.9948	6.84245	15.2535
T303_00220	acetate kinase	Chromosome:34774-35995	1221	129.43	248.035	221.099	248.381	260.286	398.131
T303_00225	adenine methyltransferase	Chromosome:36023-36980	957	117.827	183.972	190.797	215.236	222.867	316.061
T303_00230	competence protein ComG	Chromosome:37024-40640	3616	29.6262	41.9436	8.11992	19.5756	18.2942	22.8203
T303_00235	competence protein ComG	Chromosome:37024-40640	3616	21.1738	32.1267	4.51722	16.3452	12.7394	16.561
T303_00240	Type II secretory pathway, pseudopilin PulG	Chromosome:37024-40640	3616	27.147	51.6627	4.94706	24.9731	14.3312	20.5629
T303_00245	competence protein	Chromosome:37024-40640	3616	21.9122	32.6542	2.97314	13.7983	11.6124	14.7475
T303_00250	competence protein ComGC	Chromosome:37024-40640	3616	29.3372	45.3058	4.49417	19.986	15.0079	14.0258
T303_00255	competence protein CglB	Chromosome:37024-40640	3616	29.3386	34.8378	3.3481	17.765	10.7987	17.0957
T303_00260	competence protein CglA	Chromosome:37024-40640	3616	43.4419	47.5521	3.319	22.7583	12.6723	19.42
T303_00265	superoxide dismutase	Chromosome:40720-41083	363	2864.11	4198.21	659.546	4723.33	576.931	14608.7
T303_00270	DNA-directed RNA polymerase subunit beta'	Chromosome:41240-44879	3639	604.171	884.558	1158.11	1303.2	1431.87	620.682
T303_00275	DNA-directed RNA polymerase subunit beta	Chromosome:44979-48561	3582	352.84	501.998	937.79	816.743	1165.85	361.174
T303_00280	penicillin-binding protein 1B	Chromosome:48923-51347	2424	78.2082	74.7039	99.137	91.7677	134.202	118.801
T303_00290	ketol-acid reductoisomerase	Chromosome:52829-53852	1023	255.962	497.639	513.962	950.944	625.47	388.936
T303_00295	acetolactate synthase	Chromosome:53927-56115	2188	44.193	65.2652	147.75	99.0019	189.324	118.306
T303_00300	acetolactate synthase	Chromosome:53927-56115	2188	72.2363	98.6884	184.845	142.263	238.573	158.206
T303_00310	dihydroxyacetone kinase	Chromosome:58120-60153	2033	250.353	207.287	1343.13	434.18	1142.6	1053.68
T303_00315	hypothetical protein	Chromosome:58120-60153	2033	240.87	218.828	1480.13	414.483	1191.27	715.507
T303_00320	sodium:solute antiporter	Chromosome:60262-61552	1290	129.16	117.36	32.7688	77.1277	36.2877	44.5587
T303_00325	threonine synthase	Chromosome:61609-63094	1485	885.675	1425.32	358.684	1941.04	234.351	333.858
T303_00330	hypothetical protein	Chromosome:63181-63442	261	10.001	13.2215	11.8915	20.2793	13.4115	28.6964
T303_00350	endopeptidase	Chromosome:66415-68311	1896	94.17	113.265	717.827	258.218	688.315	537.254
T303_00355	glutamate racemase	Chromosome:68391-68652	261	20.3616	11.2603	5.04107	17.0961	16.5181	33.3571
T303_00360	alpha-amylase	Chromosome:68665-69413	748	11.4219	7.53286	3.88774	9.86314	11.68	18.1382
T303_00365	alpha,alpha-phosphotrehalase	Chromosome:68665-69413	748	19.193	13.0153	4.54135	11.8377	15.9615	29.6978
T303_00370	hypothetical protein	Chromosome:69421-69544	123	14.5888	0	13.0646	0	13.713	22.333
T303_00380	GntR family transcriptional regulator	Chromosome:70692-70851	159	28.45	7.81985	5.08096	8.11795	19.0498	16.9772
T303_00385	trehalose operon transcriptional repressor	Chromosome:70905-71403	498	15.6471	6.84873	6.66342	10.1235	14.3481	17.2771
T303_00390	hypothetical protein	Chromosome:71458-72019	561	105.409	95.3103	237.39	166.484	323.737	289.086
T303_00395	hypothetical protein	Chromosome:72031-72370	339	39.9378	29.1605	156.836	54.1758	207.865	144.707
T303_00410	DNA recombinase	Chromosome:73929-74451	522	223.273	158.103	159.713	224.466	157.016	851.134
T303_00415	hypothetical protein	Chromosome:74479-74776	297	28.8472	10.8768	35.5524	18.8446	39.4363	102.717
T303_00420	ArsR family transcriptional regulator	Chromosome:75482-77956	2474	266.005	278.332	16.8098	325.678	81.2795	94.6712
T303_00425	cadmium transporter	Chromosome:75482-77956	2474	289.971	350.694	29.4024	380.584	155.79	274.402
T303_00435	restriction endonuclease subunit M	Chromosome:79536-81132	1596	80.9048	137.655	68.3289	151.95	93.4398	117.523
T303_00445	DNA-binding protein	Chromosome:84219-84531	312	31.7534	40.6006	38.1817	47.953	43.4714	39.7768
T303_00455	transposase IS905	Chromosome:84990-86166	1176	70.8659	40.4894	9.03664	40.4805	10.4117	35.0321
T303_00465	fructose-1,6-bisphosphate aldolase	Chromosome:87117-87999	882	10630.5	21996.6	7413.58	23905.7	5172.19	25223.8
T303_00470	tRNA-Leu	Chromosome:88145-88231	86	0	0	0	0	0	0
T303_00485	transposase ISApl1	Chromosome:90164-90851	687	41.7049	43.7987	24.8556	48.6698	44.8534	70.9197
T303_00490	50S ribosomal protein L17	Chromosome:91048-91435	387	230.288	179.546	3930.78	595.379	4866.93	754.951
T303_00495	DNA-directed RNA polymerase subunit alpha	Chromosome:91452-92391	939	208.03	182.814	3405.41	525.996	4332.25	636.402
T303_00500	30S ribosomal protein S11	Chromosome:92439-92823	384	211.46	209.629	3152.4	533.395	4054.96	746.96
T303_00505	30S ribosomal protein S13	Chromosome:92850-93216	366	183.659	264.197	2728.08	503.525	3561.77	652.278
T303_00510	50S ribosomal protein L36	Chromosome:93233-93350	117	1564.47	2320.43	19093.4	3950.14	25702	5571.79
T303_00515	translation initiation factor IF-1	Chromosome:93375-93594	219	148.872	230.634	1978.96	429.985	2507.08	677.737
T303_00520	adenylate kinase	Chromosome:93711-94368	657	72.8794	118.623	481.81	154.248	573.434	66.7584
T303_00525	preprotein translocase subunit SecY	Chromosome:94499-95795	1296	498.07	508.635	2613.45	1074.61	3666.04	1983.22
T303_00530	50S ribosomal protein L15	Chromosome:95811-96252	441	739.991	847.148	3665.73	1704.06	5339.56	2975.39
T303_00535	50S ribosomal protein L30	Chromosome:96379-96562	183	1388.14	1684.84	6307.26	3499.1	9009.39	5651.09
T303_00540	30S ribosomal protein S5	Chromosome:96576-97071	495	551.142	781.866	2482.42	1528.15	3500.59	2986.94
T303_00545	50S ribosomal protein L18	Chromosome:97089-97455	366	734.814	1132.56	3406.21	2044.78	5051.31	4133.66
T303_00550	50S ribosomal protein L6	Chromosome:97535-98072	537	850.379	1253.73	4030.07	2369.21	6121.55	5001.42
T303_00555	30S ribosomal protein S8	Chromosome:98198-98597	399	525.341	747.754	2444.83	1400.12	3512.06	3010.52
T303_00560	rpsN; 30S ribosomal protein S14	Chromosome:98719-98905	186	1267.69	1912.62	6104.26	3526.06	9519.9	7607.66
T303_00565	50S ribosomal protein L5	Chromosome:98922-99465	543	681.611	1083.24	3037.53	2043.23	4462.23	3997.51
T303_00570	50S ribosomal protein L24	Chromosome:99491-99797	306	598.063	1049.46	2755	1860.96	4237.91	3501.74
T303_00575	50S ribosomal protein L14	Chromosome:99877-100246	369	671.016	1235.66	3179.26	2139.52	4735.81	4219.71
T303_00580	30S ribosomal protein S17	Chromosome:100270-100531	261	551.332	995.155	2586.78	1800.4	3928.86	3469.93
T303_00585	50S ribosomal protein L29	Chromosome:100558-100765	207	295.904	642.837	1423.34	1072.23	2149.84	2220.91
T303_00590	50S ribosomal protein L16	Chromosome:100774-101188	414	559.187	1011.19	2966.88	1739.5	4748.91	3557.72
T303_00595	30S ribosomal protein S3	Chromosome:101191-101845	654	802.386	1455.41	4190.91	2590.07	7017.95	4784.25
T303_00600	50S ribosomal protein L22	Chromosome:101857-102202	345	539.761	1079.41	3048.65	1838.65	4850.65	3585.86
T303_00605	30S ribosomal protein S19	Chromosome:102217-102496	279	505.494	983.272	2649.27	1682.14	4155.36	3083.77
T303_00610	rplB; 50S ribosomal protein L2	Chromosome:102589-103423	834	559.544	979.788	3557.46	1746.66	5759.23	3508.06
T303_00615	50S ribosomal protein L23	Chromosome:103440-104360	920	316.507	538.535	1952.2	978.063	2917.78	1967.79
T303_00620	50S ribosomal protein L4	Chromosome:103440-104360	920	428.465	781.661	2894.26	1424.91	4558.9	2550.68
T303_00625	50S ribosomal protein L3	Chromosome:104384-105011	627	521.41	990.109	3968.06	1664.52	6415.2	2922.77
T303_00630	30S ribosomal protein S10	Chromosome:105127-105436	309	454.749	714.237	4180.43	1198.07	6525.77	2697.22
T303_00635	Holliday junction DNA helicase RuvB	Chromosome:105679-106681	1002	530.499	358.586	440.619	613.992	429.881	521.07
T303_00640	acyltransferase	Chromosome:106762-109424	2662	247.853	123.545	289.966	239.987	275.795	239.651
T303_00645	membrane protein	Chromosome:106762-109424	2662	230.497	136.276	236.474	268.775	231.758	169.44
T303_00650	phosphotyrosine protein phosphatase	Chromosome:106762-109424	2662	230.936	138.373	234.153	292.981	215.839	197.438
T303_00655	adenylosuccinate synthetase	Chromosome:109706-110999	1293	441.171	610.798	972.936	1067.97	929.918	1410.8
T303_00660	topology modulation protein	Chromosome:111323-111770	447	26.8557	21.1203	66.0226	64.5575	82.3622	113.792
T303_00665	multidrug-efflux transporter	Chromosome:112059-114277	2218	0.862738	0.950226	5.04799	1.38795	4.28122	2.07573
T303_00670	bacteriocin biosynthesis protein	Chromosome:112059-114277	2218	8.14937	6.87175	50.6968	17.6408	34.348	25.0853
T303_00685	ABC transporter ATP-binding protein	Chromosome:116934-118503	1569	12.2338	12.9765	16.8105	18.9581	23.2368	21.0598
T303_00690	hypothetical protein	Chromosome:119257-119401	144	39.2549	31.59	44.4645	29.5319	24.2227	132.033
T303_00695	MutR family transcriptional regulator	Chromosome:119418-120117	699	42.3218	40.1786	58.3782	70.6007	74.3284	100.45
T303_00700	hypothetical protein	Chromosome:120194-120302	108	400.747	151.517	107.902	648.898	181.1	0
T303_00710	ABC transporter ATP-binding protein	Chromosome:121549-123091	1542	65.0059	65.2373	67.2288	107.502	91.5074	81.8199
T303_00720	hypothetical protein	Chromosome:124202-124370	168	0	2.69169	0.912145	0	8.13427	3.29582
T303_00730	replication initiator protein	Chromosome:125270-125393	123	0	0	0	0	13.713	0
T303_00735	hypothetical protein	Chromosome:125404-125593	189	3.71044	8.75893	2.59648	24.6713	10.0317	27.6461
T303_00740	integrase	Chromosome:125594-126734	1140	5.44858	7.43573	8.29331	12.5117	23.0893	33.7078
T303_00745	tRNA-Lys	Chromosome:126817-126893	76	0	0	0	0	0	0
T303_00750	recombinase RarA	Chromosome:127175-128444	1269	397.018	408.167	121.153	552.068	113.703	706.338
T303_00755	50S ribosomal protein L28	Chromosome:128613-128802	189	484.584	895.533	2574.19	1718.5	3578.67	1756.12
T303_00760	hypothetical protein	Chromosome:128928-129614	686	574.748	436.757	1099.64	1038.8	956.008	1319.81
T303_00765	Holliday junction resolvase	Chromosome:128928-129614	686	654.606	380.754	1259.82	977.261	1147.73	1265.31
T303_00770	hypothetical protein	Chromosome:129692-130028	336	616.747	322.073	1060.36	869.287	970.706	919.894
T303_00775	4-amino-4-deoxy-L-arabinose transferase glycosyltransferase-like protein of PMT family	Chromosome:130240-131887	1647	69.4006	59.7966	91.6359	129.198	208.925	287.674
T303_00780	ribonucleoside triphosphate reductase	Chromosome:131996-134201	2205	797.901	1133.86	332.712	1520.82	200.526	265.581
T303_00785	hypothetical protein	Chromosome:134300-134432	132	1814.44	1894.04	717.044	3492.25	367.937	485.43
T303_00790	GNAT family acetyltransferase	Chromosome:134433-134934	501	1025.22	1549.94	395.854	1913.02	272.584	328.676
T303_00795	anaerobic ribonucleoside-triphosphate reductase activating protein	Chromosome:134938-135544	606	1277.35	1976.29	498.889	2431.7	358.757	416.81
T303_00800	hypothetical protein	Chromosome:135565-136369	804	394.606	295.353	206.144	588.664	264.41	338.794
T303_00805	tyrosyl-tRNA synthetase	Chromosome:136392-139078	2686	326.293	249.434	366.881	458.686	401.497	238.438
T303_00810	aspartyl-tRNA synthetase	Chromosome:136392-139078	2686	303.04	277.976	299.107	585.78	297.49	204.296
T303_00815	hypothetical protein	Chromosome:139187-139610	423	171.824	156.284	600.226	306.598	668.953	646.365
T303_00820	histidyl-tRNA synthase	Chromosome:139617-140898	1281	133.305	124.525	444.473	243.539	493.305	377.196
T303_00830	methionine synthase	Chromosome:142092-142320	228	74.638	45.7921	22.7099	95.1419	22.6942	101.063
T303_00835	50S ribosomal protein L32	Chromosome:142549-142732	183	375.77	309.103	1369.38	871.039	1578.85	750.808
T303_00840	50S ribosomal protein L33	Chromosome:142747-142897	150	1639.13	604.199	7221.42	1943.21	8652.16	2099.69
T303_00860	hypothetical protein	Chromosome:145536-145908	372	4.20816	4.94271	4.54773	7.9286	11.3273	17.2113
T303_00865	Transglycosylase associated protein	Chromosome:146497-146737	240	43823.4	75882.8	8241.05	112697	1878.46	122427
T303_00870	membrane protein	Chromosome:146799-147366	567	24122.9	34552.3	4486.85	54758.7	1015.82	62716.3
T303_00875	membrane protein	Chromosome:147378-147549	171	21348.5	30998.7	3426.23	48648.3	713.885	53690.4
T303_00880	General stress regulator, Gls24 family	Chromosome:147563-148121	558	43400.6	61280.5	7069.42	95166.6	1520.76	0
T303_00885	hypothetical protein	Chromosome:148193-148397	204	98237.4	138425	15462.6	200477	3228.44	198648
T303_00910	hypothetical protein	Chromosome:152137-152893	756	4.17189	1.69876	1.13305	3.65599	2.8194	4.9416
T303_00915	membrane protein	Chromosome:152929-155299	2370	21.5042	32.3649	21.5787	53.908	60.1747	104.39
T303_00920	TetR family transcriptional regulator	Chromosome:155427-155967	540	67.8498	38.6194	41.4713	86.4677	51.975	61.871
T303_00925	membrane protein	Chromosome:156044-156407	363	13.8152	6.58471	71.1087	18.8811	132.535	85.2939
T303_00935	30S ribosomal protein S4	Chromosome:156937-157630	693	159.574	176.397	2387.35	489.637	3252.19	1128.21
T303_00940	hypothetical protein	Chromosome:157746-158049	303	277.808	154.454	294.859	344.353	511.011	542.988
T303_00945	DNA helicase	Chromosome:158072-159434	1362	319.552	279.416	315.254	549.767	480.654	529.383
T303_00950	50S ribosomal protein L9	Chromosome:159477-159936	459	289.103	425.312	342.739	708.727	444.094	377.488
T303_00955	DHH family phosphoesterase	Chromosome:159937-161902	1965	111.88	165.01	413.027	272.245	522.568	294.276
T303_00960	tRNA uridine 5-carboxymethylaminomethyl modification protein	Chromosome:161975-163877	1902	50.0337	42.3715	235.672	129.256	334.765	257.756
T303_00965	NUDIX hydrolase	Chromosome:163885-164341	456	25.4363	24.8979	193.017	79.0035	278.077	160.807
T303_00970	thiouridylase	Chromosome:164605-165727	1122	51.0874	45.5529	251.162	94.9206	415.697	325.197
T303_00975	membrane protein	Chromosome:165865-167596	1731	60.7335	89.8884	61.341	95.6395	161.311	235.046
T303_00980	hypothetical protein	Chromosome:167682-168312	630	8.39897	10.333	63.5503	29.3806	242.646	253.338
T303_00985	peptidoglycan-binding protein LysM	Chromosome:168551-169106	555	53.9683	53.3894	1521.28	246.903	4345.64	4664.83
T303_00990	transporter	Chromosome:169409-171845	2436	132.213	107.597	235.89	242.279	331.324	341.025
T303_00995	cbiO; cobalt ABC transporter ATP-binding protein	Chromosome:169409-171845	2436	132.856	138.06	217.299	270.142	281.666	289.479
T303_01000	cbiO; cobalt ABC transporter ATP-binding protein	Chromosome:169409-171845	2436	261.805	213.566	352.249	451.231	410.404	451.97
T303_01005	CDP-diacylglycerol--glycerol-3-phosphate 3-phosphatidyltransferase	Chromosome:171857-172400	543	230.609	190.633	277.893	456.76	309.554	380.371
T303_01010	membrane protein	Chromosome:172412-173270	858	247.563	191.628	252.2	482.838	269.203	363.51
T303_01015	peptidase M16	Chromosome:173328-174606	1278	28.7765	22.0063	153.253	81.6763	166.674	82.8139
T303_01020	peptidase M16	Chromosome:174607-175858	1251	14.8326	10.8882	147.72	42.8556	163.555	64.5605
T303_01025	hypothetical protein	Chromosome:175936-177416	1480	48.0752	23.6686	538.924	69.5543	326.378	122.037
T303_01030	recombinase RecF	Chromosome:175936-177416	1480	64.6689	37.6393	441.403	104.392	291.332	130.276
T303_01035	inosine 5'-monophosphate dehydrogenase	Chromosome:177584-179066	1482	367.126	670.073	921.135	1767.38	1249.14	1110.95
T303_01040	tryptophanyl-tRNA synthase	Chromosome:179242-180265	1023	90.3706	88.0485	168.266	291.026	449.645	491.543
T303_01045	membrane protein	Chromosome:180692-181565	873	94.9228	70.2679	218.026	202.964	160.357	170.285
T303_01050	ABC transporter ATP-binding protein	Chromosome:181631-183254	1623	1079.67	902.684	741.009	1431.44	508.067	504.756
T303_01055	ABC transporter permease	Chromosome:183303-185910	2607	284.563	150.132	142.012	202.068	110.136	113.726
T303_01060	tRNA-Asn	Chromosome:185999-186073	74	0	0	0	0	0	0
T303_01065	tRNA-Glu	Chromosome:186095-186167	72	0	0	0	0	0	0
T303_01070	tRNA-Arg	Chromosome:186354-186428	74	0	0	0	0	0	0
T303_01080	50S rRNA methyltransferase	Chromosome:187152-187656	504	144.962	72.7107	63.3407	188.907	96.0206	65.5878
T303_01085	serine protease	Chromosome:187836-189072	1236	665.722	880.512	1158.5	2035.02	784.797	7398.56
T303_01090	plasmid partitioning protein ParB	Chromosome:189137-189905	768	89.6673	144.351	41.2627	118.399	60.569	72.5147
T303_01095	chromosomal replication initiation protein DnaA	Chromosome:190143-191508	1365	116.387	89.7389	151.723	192.149	191.796	283.466
T303_01100	DNA polymerase III subunit beta	Chromosome:191662-192799	1137	160.008	110.167	218.518	244.609	309.012	586.51
T303_01105	hypothetical protein	Chromosome:192849-193041	192	34.0619	17.9203	17.1522	17.1895	21.691	35.1623
T303_01110	GTP-binding protein YchF	Chromosome:193253-194369	1116	97.8121	64.132	382.825	124.506	346.456	178.805
T303_01115	peptidyl-tRNA hydrolase	Chromosome:194441-198591	4150	50.221	48.4233	45.5961	40.0004	51.7747	41.1277
T303_01120	transcription-repair coupling factor	Chromosome:194441-198591	4150	110.379	124.021	69.858	96.1596	89.7261	97.0812
T303_01125	hypothetical protein	Chromosome:198694-202010	3316	1169.99	831.446	1461.28	1386.53	1069.51	2143.93
T303_01130	septum formation initiation protein	Chromosome:198694-202010	3316	825.108	457.221	1018.5	860.663	762.445	1358.1
T303_01135	recombinase	Chromosome:198694-202010	3316	3218.66	1539.25	4559.69	3506.5	3368.42	5073.29
T303_01140	beta-lactamase	Chromosome:198694-202010	3316	773.301	521.312	899.175	836.502	762.21	1473.82
T303_01145	tRNA(Ile)-lysidine synthetase	Chromosome:198694-202010	3316	168.232	216.72	252.474	251.746	213.532	188.328
T303_01150	hypoxanthine phosphoribosyltransferase	Chromosome:202091-202634	543	251.059	395.066	1162.56	577.384	1184.81	806.524
T303_01155	cell division protein FtsH	Chromosome:202649-204617	1968	550.427	1024.5	1918.18	1300.47	1830.45	1738.8
T303_01165	transposase	Chromosome:206015-206552	537	35.7605	31.2843	127.385	51.7731	132.767	74.1103
T303_01175	transposase	Chromosome:206861-207368	507	7.23344	8.73377	12.0943	14.6806	12.4689	47.0413
T303_01180	16S ribosomal RNA	Chromosome:207774-209321	1547	0	0	0	0	0	0
T303_01185	tRNA-Ala	Chromosome:209372-209445	73	0	0	0	0	0	0
T303_01190	23S ribosomal RNA	Chromosome:209590-212492	2902	0	0	0	0	0	0
T303_01195	5S ribosomal RNA	Chromosome:212574-212690	116	0	0	0	0	0	0
T303_01200	tRNA-Val	Chromosome:212695-212768	73	0	0	0	0	0	0
T303_01205	tRNA-Asp	Chromosome:212770-212843	73	0	0	0	0	0	0
T303_01210	tRNA-Lys	Chromosome:212862-212935	73	0	0	0	0	0	0
T303_01215	tRNA-Leu	Chromosome:212940-213022	82	0	0	0	0	0	0
T303_01220	tRNA-Thr	Chromosome:213036-213109	73	0	0	0	0	0	0
T303_01225	tRNA-Gly	Chromosome:213115-213187	72	0	0	0	0	0	0
T303_01230	tRNA-Leu	Chromosome:213193-213279	86	0	0	0	0	0	0
T303_01235	tRNA-Arg	Chromosome:213293-213367	74	0	0	0	0	0	0
T303_01240	tRNA-Pro	Chromosome:213374-213448	74	0	0	0	0	0	0
T303_01245	tRNA-Met	Chromosome:213453-213527	74	0	0	0	0	0	0
T303_01250	tRNA-Met	Chromosome:213541-213615	74	0	0	0	0	0	0
T303_01255	tRNA-Ser	Chromosome:213634-213724	90	0	0	0	0	0	0
T303_01260	tRNA-Met	Chromosome:213733-213807	74	0	0	0	0	0	0
T303_01265	tRNA-Phe	Chromosome:213810-213883	73	0	0	0	0	0	0
T303_01270	tRNA-Gly	Chromosome:213895-213966	71	0	0	0	0	0	0
T303_01275	tRNA-Ile	Chromosome:213999-214073	74	0	0	0	0	0	0
T303_01280	tRNA-Ser	Chromosome:214077-214165	88	0	0	0	0	0	0
T303_01285	rod shape-determining protein MreC	Chromosome:214221-215052	831	20.0529	25.3613	131.812	32.0735	198.435	100.551
T303_01290	rod shape-determining protein MreD	Chromosome:215053-215578	525	5.19778	4.61333	26.8011	5.14576	42.5098	18.5204
T303_01295	glucan binding protein	Chromosome:215662-217030	1368	374.534	654.877	2954.45	915.174	5209.92	6448.34
T303_01300	ribose-phosphate pyrophosphokinase	Chromosome:217231-218209	978	233.831	327.233	594.99	370.056	829.196	651.691
T303_01310	aminotransferase A	Chromosome:219315-221251	1936	38.514	61.2587	120.948	104.956	250.566	219.75
T303_01315	DNA repair protein RecO	Chromosome:219315-221251	1936	51.6809	76.5533	164.991	139.557	370.496	320.908
T303_01320	phosphate acyltransferase	Chromosome:221467-222717	1250	64.9529	73.9267	124.437	130.428	237.506	367.289
T303_01325	acyl carrier protein	Chromosome:221467-222717	1250	45.4008	36.3036	96.7831	81.5296	165.203	322.463
T303_01330	phosphoribosylaminoimidazole-succinocarboxamide synthase	Chromosome:223001-223709	708	713.101	1753.79	211.401	1179.57	104.558	369.714
T303_01335	phosphoribosylformylglycinamidine synthase	Chromosome:223740-227490	3750	830.965	2074.62	224.144	1352.8	102.129	388.973
T303_01340	amidophosphoribosyltransferase	Chromosome:227658-229098	1440	929.434	1659.43	267.382	1045.74	136.896	260.39
T303_01345	phosphoribosylaminoimidazole synthetase	Chromosome:229128-230702	1574	966.287	1424.33	308.236	846.931	174.066	228.631
T303_01350	phosphoribosylglycinamide formyltransferase	Chromosome:229128-230702	1574	879.391	1245.71	279.514	663.521	158.332	183.197
T303_01355	purH; purine biosynthesis protein purH	Chromosome:230719-232318	1599	1103.1	1714.33	406.349	870.425	244.582	132.884
T303_01360	transposase	Chromosome:232489-233008	519	17.0317	15.808	22.1397	25.548	18.6161	38.1673
T303_01375	cell wall protein precursor, choline binding protein	Chromosome:233714-234554	840	8.10403	8.85962	5.98721	11.8921	14.799	30.096
T303_01380	phosphoribosylamine--glycine ligase	Chromosome:234862-236125	1263	152.791	141.067	406.075	233.83	189.097	66.478
T303_01390	phosphoribosylaminoimidazole carboxylase	Chromosome:236945-238037	1092	158.903	138.74	376.668	228.527	161.929	107.508
T303_01405	adenylosuccinate lyase	Chromosome:239499-240798	1299	352.004	408.613	536.438	469.224	327.307	481.333
T303_01410	hypothetical protein	Chromosome:240951-241122	171	134.236	48.4101	207.905	92.5671	142.996	95.3047
T303_01415	arginyl-tRNA synthetase	Chromosome:241660-243352	1692	609.22	741.43	452.551	827.313	437.813	328.524
T303_01420	arginine repressor ArgR	Chromosome:243476-246845	3369	137.201	114.569	189.763	137.943	188.145	126.778
T303_01425	hypothetical protein	Chromosome:243476-246845	3369	192.468	192.935	227.142	219.603	276.766	213.789
T303_01430	DNA mismatch repair protein MutS	Chromosome:243476-246845	3369	153.982	168.472	155.202	172.875	166.3	144.894
T303_01435	hypothetical protein	Chromosome:247091-247334	243	20.4762	36.8829	9.96134	21.6523	17.2587	33.0984
T303_01440	hisitidine kinase	Chromosome:247347-247722	375	15.9411	24.033	8.21216	22.7053	11.3763	34.0016
T303_01445	hypothetical protein	Chromosome:247945-248251	306	18.0912	13.7046	36.1307	27.8773	38.2329	40.2698
T303_01450	DNA mismatch repair protein MutL	Chromosome:248302-250246	1944	75.1677	67.7859	108.731	161.813	136.17	238.58
T303_01455	hypothetical protein	Chromosome:250375-250597	222	186.55	152.319	168.132	257.759	124.585	680.331
T303_01460	Holliday junction DNA helicase RuvA	Chromosome:250748-251339	591	104.385	142.409	187.022	204.816	171.847	636.06
T303_01465	3-methyladenine DNA glycosylase	Chromosome:251345-251900	555	109.458	142.193	213.963	194.622	209.569	621.621
T303_01470	damage-inducible protein A	Chromosome:251995-253267	1272	244.523	240.416	545.585	548.275	823.779	1166.97
T303_01475	recombinase RecA	Chromosome:253302-254442	1140	209.566	152.478	643.053	463.583	935.637	1177.31
T303_01480	spxA; arsenate reductase	Chromosome:254618-255017	399	270.55	242.256	821.661	450.37	785.106	532.462
T303_01485	16S ribosomal RNA	Chromosome:255434-256981	1547	0	0	0	0	0	0
T303_01490	tRNA-Ala	Chromosome:257032-257105	73	0	0	0	0	0	0
T303_01495	23S ribosomal RNA	Chromosome:257250-260152	2902	0	0	0	0	0	0
T303_01500	5S ribosomal RNA	Chromosome:260234-260350	116	0	0	0	0	0	0
T303_01505	tRNA-Val	Chromosome:260355-260428	73	0	0	0	0	0	0
T303_01510	tRNA-Gly	Chromosome:260432-260503	71	0	0	0	0	0	0
T303_01515	tRNA-Ile	Chromosome:260536-260610	74	0	0	0	0	0	0
T303_01520	tRNA-Glu	Chromosome:260616-260688	72	0	0	0	0	0	0
T303_01525	tRNA-Ser	Chromosome:260696-260786	90	0	0	0	0	0	0
T303_01530	tRNA-Met	Chromosome:260795-260869	74	0	0	0	0	0	0
T303_01535	tRNA-Phe	Chromosome:260872-260945	73	0	0	0	0	0	0
T303_01540	tRNA-Tyr	Chromosome:260959-261040	81	0	0	0	0	0	0
T303_01545	tRNA-Trp	Chromosome:261045-261116	71	0	0	0	0	0	0
T303_01550	tRNA-His	Chromosome:261127-261200	73	0	0	0	0	0	0
T303_01555	tRNA-Gln	Chromosome:261206-261278	72	0	0	0	0	0	0
T303_01560	tRNA-Leu	Chromosome:261287-261371	84	0	0	0	0	0	0
T303_01565	DNA polymerase III PolC	Chromosome:261421-265816	4395	136.751	225.458	169.943	265.049	267.081	257.312
T303_01570	aminopeptidase T	Chromosome:265979-267221	1242	35.8158	33.8551	166.144	64.9537	186.527	185.402
T303_01575	membrane protein	Chromosome:267240-267471	231	52.3378	41.6987	227.895	74.3865	244.73	331.582
T303_01585	MarR family transcriptional regulator	Chromosome:267673-268003	330	21.3525	14.2195	55.9318	21.3745	81.0559	97.6105
T303_01595	transposase	Chromosome:268721-269210	489	6.24072	6.28804	11.2793	9.45992	14.9513	32.2167
T303_01600	transposase IS861	Chromosome:269223-269487	264	8.46494	4.70774	20.4361	8.64121	19.8169	15.0472
T303_01605	hypothetical protein	Chromosome:269613-269886	273	0.202225	1.15279	1.67206	0	5.50097	7.606
T303_01615	tRNA-Cys	Chromosome:271195-271266	71	0	0	0	0	0	0
T303_01620	30S ribosomal protein S2	Chromosome:271580-272348	768	576.931	1384.93	3456.41	1911.82	4417.8	1725.64
T303_01625	elongation factor Ts	Chromosome:272458-273499	1041	652.402	1080.16	2429.1	1632.97	3013.82	1387.37
T303_01630	small multi-drug export	Chromosome:273608-274079	471	259.835	308.997	448.778	444.49	544.883	314.956
T303_01635	CtsR family transcriptional regulator of class III stress genes (heat shock response)	Chromosome:274322-274778	456	932.569	1993.26	277.554	2026.55	290.898	573.95
T303_01640	ATP-dependent Clp protease ATP-binding protein	Chromosome:274778-277229	2451	1559.26	2467.54	377.546	2297.46	427.945	901.682
T303_01650	D-alanyl-D-alanine carboxypeptidase	Chromosome:278758-280027	1269	106.783	124.113	350.532	224.216	369.017	362.289
T303_01655	polynucleotide phosphorylase	Chromosome:280214-282440	2226	168.522	196.391	304.194	365.563	331.179	131.717
T303_01660	hypothetical protein	Chromosome:282448-283219	771	152.131	178.417	252.733	280.213	288.934	119.914
T303_01665	serine acetyltransferase	Chromosome:283282-283912	630	138.439	147.692	246.909	253.978	271.908	116.268
T303_01670	hypothetical protein	Chromosome:283924-284083	159	193.58	188.899	358.304	344.166	357.779	166.724
T303_01675	cysteinyl-tRNA synthease	Chromosome:284293-286031	1738	128.857	135.015	308.425	246.219	359.913	126.356
T303_01680	Mini-ribonuclease 3	Chromosome:284293-286031	1738	118.588	134.329	397.53	226.824	456.951	138.101
T303_01685	hypothetical protein	Chromosome:286313-286469	156	37.1779	45.1407	39.5989	51.2754	60.3267	12.5835
T303_01690	hypothetical protein	Chromosome:286544-286733	189	39.3722	18.7932	24.0285	63.5262	43.7731	32.1622
T303_01695	hypothetical protein	Chromosome:286803-287046	243	33.508	28.1673	25.1254	29.3079	34.0515	28.0521
T303_01700	rRNA methyltransferase	Chromosome:287093-287837	744	136.192	87.1456	300.416	185.699	329.599	198.503
T303_01705	hypothetical protein	Chromosome:287839-288355	516	201.842	131.013	355.396	262.193	414.506	336.045
T303_01710	hypothetical protein	Chromosome:288363-289224	861	360.653	311.458	353.876	473.176	406.172	481.189
T303_01715	hypothetical protein	Chromosome:289401-289494	93	0	0	0	0	0	0
T303_01720	hypothetical protein	Chromosome:289524-290025	501	266.406	325.936	95.2085	368.741	97.1142	123.81
T303_01725	2-dehydropantoate 2-reductase	Chromosome:290172-291129	957	663.143	1074.04	740.698	1926.34	1200.26	1422.2
T303_01730	50S ribosomal protein L13	Chromosome:291337-291784	447	1082.97	2063.2	3955.61	3443.02	5252.8	4049.16
T303_01735	30S ribosomal protein S9	Chromosome:291811-292204	393	1760.59	3726.11	4636.31	6189.39	6173.45	5241.28
T303_01740	hypothetical protein	Chromosome:292218-293558	1340	0	0	0	0	0	0
T303_01745	transposase IS1193	Chromosome:292218-293558	1340	0	0	0	0	0	0
T303_01750	DNA-binding protein	Chromosome:294097-294361	264	2.46716	3.41351	5.91817	5.30037	14.8028	10.2664
T303_01755	bacteriocin	Chromosome:294610-294715	105	0	0	234.481	0	0	0
T303_01765	lantibiotic biosynthesis protein	Chromosome:297723-298947	1224	9.57405	9.01893	12.1724	19.4938	19.7154	23.705
T303_01770	lantibiotic transporter	Chromosome:298970-300236	1266	9.35506	7.98513	12.331	16.731	23.9269	23.9269
T303_01775	ATP-dependent DNA helicase recG	Chromosome:300464-300977	513	16.0049	19.6402	24.4153	39.5409	46.8705	76.9989
T303_01785	Fis family transcriptional regulator	Chromosome:302541-302814	273	11.2807	10.9291	2.91021	12.9619	5.10826	16.2987
T303_01790	hypothetical protein	Chromosome:302875-304066	1191	28.6646	19.2705	37.1111	41.5853	44.2654	58.4418
T303_01795	hypothetical protein	Chromosome:304095-304212	117	0	0	25.4262	0	51.8797	0
T303_01800	hypothetical protein	Chromosome:304312-304807	495	52.1361	56.6096	16.2179	91.6497	17.5011	82.9586
T303_01810	metallophosphatase	Chromosome:305915-307133	1218	64.134	49.8459	76.9332	99.9215	128.519	287.503
T303_01815	hypothetical protein	Chromosome:307453-307720	267	422.964	561.692	308.039	863.33	186.168	906.585
T303_01820	hypothetical protein	Chromosome:307731-309075	1344	643.233	524.936	443.627	787.328	273.4	774.55
T303_01825	hypothetical protein	Chromosome:309192-309519	327	228.866	88.7376	107.757	212.841	124.098	253.591
T303_01830	D-alanyl-D-alanine carboxypeptidase	Chromosome:309558-310937	1379	244.979	79.9104	122.109	210.463	162.075	310.214
T303_01835	peptidoglycan hydrolase	Chromosome:309558-310937	1379	199.623	71.6267	140.648	174.361	216.125	385.333
T303_01840	HrcA family transcriptional regulator	Chromosome:311124-312772	1648	0	0	454.984	0	574.304	8636.92
T303_01845	heat shock protein GrpE	Chromosome:311124-312772	1648	0	0	680.953	0	1076.36	20386.3
T303_01850	dnaK; molecular chaperone DnaK	Chromosome:312895-314719	1824	0	0	1510.04	0	2921.7	0
T303_01855	molecular chaperone DnaJ	Chromosome:315146-316298	1152	7335.9	15678.1	459.664	20750.9	1141.84	2731.51
T303_01860	tRNA pseudouridine synthase A	Chromosome:316403-318364	1961	240.66	339.575	195.582	382.929	238.36	66.1378
T303_01865	phosphomethylpyrimidine kinase	Chromosome:316403-318364	1961	129.323	145.593	99.2229	224.906	127.954	46.0934
T303_01870	membrane protein	Chromosome:316403-318364	1961	107.395	128.553	107.165	210.666	131.539	56.4856
T303_01875	16S ribosomal RNA	Chromosome:318752-320299	1547	0	0	0	0	0	0
T303_01880	tRNA-Ala	Chromosome:320350-320423	73	0	0	0	0	0	0
T303_01885	23S ribosomal RNA	Chromosome:320568-323470	2902	0.603959	1.48725	0.20194	2.37179	0.157881	1.48625
T303_01890	5S ribosomal RNA	Chromosome:323552-323668	116	0	0	0	0	0	0
T303_01895	tRNA-Asn	Chromosome:323673-323747	74	0	0	0	0	0	0
T303_01900	hypothetical protein	Chromosome:324431-324653	222	1012.6	910.642	1676.99	1700.74	721.638	1541.37
T303_01905	CpsL protein	Chromosome:324703-324883	180	54.071	69.1011	123.602	99.7379	116.77	57.9127
T303_01910	aminoacylase	Chromosome:325249-325594	345	0.979561	0	0.870524	0.309786	3.65379	4.04877
T303_01915	cyclopropane-fatty-acyl-phospholipid synthase	Chromosome:325687-326887	1200	1061.34	920.097	269.532	1111.49	276.03	1069.13
T303_01920	transposase IS1167	Chromosome:327115-327610	495	133.717	150.99	35.0958	114.851	44.2513	56.631
T303_01925	RNA polymerase sigma70	Chromosome:328363-328861	498	101.699	21.105	104.151	51.2982	121.967	56.1573
T303_01930	mechanosensitive ion channel protein	Chromosome:328960-329803	843	141.434	30.483	114.869	83.5725	129.034	40.6561
T303_01935	tig; trigger factor	Chromosome:329944-331228	1284	350.818	334.905	2539.27	828.87	2385.17	996.479
T303_01940	DNA-directed RNA polymerase subunit delta	Chromosome:331385-331961	576	139.792	56.349	1267.51	145.438	1256.6	454.951
T303_01945	pyrG; CTP synthetase	Chromosome:332211-333816	1605	76.0684	94.9944	238.261	133.66	532.335	784.788
T303_01950	hypothetical protein	Chromosome:333910-334381	471	28.9674	34.2298	53.0034	55.9472	82.1497	130.277
T303_01955	DNA mismatch repair protein MutT	Chromosome:334396-335796	1400	42.1	31.973	64.156	47.1851	95.0949	167.855
T303_01960	ribosomal protein L11 methyltransferase	Chromosome:334396-335796	1400	74.6436	45.758	100.857	76.1658	145.837	272.846
T303_01965	16S rRNA methyltransferase	Chromosome:335796-336540	744	77.7196	35.6037	115.574	72.1358	157.601	299.1
T303_01970	cpdB; 2', 3'-cyclic nucleotide 2'-phosphodiesterase	Chromosome:336705-339246	2541	128.763	96.9776	310.974	175.072	431.62	421.671
T303_01975	flavoprotein	Chromosome:339287-339815	528	91.9711	52.1289	50.2612	85.2404	72.5166	117.844
T303_01980	GTP pyrophosphokinase	Chromosome:339914-342134	2220	286.168	114.703	272.918	234.134	219.223	88.0763
T303_01985	D-tyrosyl-tRNA(Tyr) deacylase	Chromosome:342146-342590	444	217.956	75.9885	355.254	152.616	297.678	97.4504
T303_01990	hypothetical protein	Chromosome:342888-343050	162	78.5517	28.3815	4.72711	24.7398	23.0311	44.499
T303_02000	1,6-alpha-glucanhydrolase	Chromosome:343796-344567	771	84.2886	23.0006	6.04286	20.6102	18.6127	35.2642
T303_02005	threonine dehydratase	Chromosome:344867-346118	1251	46.7707	47.1809	84.9517	85.6951	149.25	48.2506
T303_02010	peptide deformylase	Chromosome:346278-346893	615	1884.21	2055.5	1099	2525.15	890.313	1165.5
T303_02015	Crp/Fnr family transcriptional regulator	Chromosome:346993-347632	639	227.98	139.047	124.782	170.99	167.911	292.092
T303_02020	permease of the major facilitator superfamily	Chromosome:347738-348902	1164	6.22792	10.6121	25.2157	18.2012	134.442	93.0258
T303_02025	30S ribosomal protein S15	Chromosome:348993-349320	327	1865.69	3661.27	5719.39	5103.62	7387.93	5369.07
T303_02030	glycopeptide antibiotics resistance protein	Chromosome:349549-350131	582	6.87768	6.60022	82.6702	19.786	166.015	148.201
T303_02035	hypothetical protein	Chromosome:350420-350540	120	0	0	31.5676	0	309.416	341.65
T303_02040	hypothetical protein	Chromosome:350698-350869	171	16.8127	19.3066	108.147	57.5939	254.338	255.212
T303_02045	hypothetical protein	Chromosome:350955-351063	108	0	0	298.857	0	554.293	603.218
T303_02050	peptide ABC transporter ATP-binding protein	Chromosome:351149-353440	2291	276.242	691.274	237.585	702.724	433.131	450.223
T303_02055	glutamine ABC transporter substrate-binding protein	Chromosome:351149-353440	2291	259.994	555.971	156.983	536.381	270.959	263.792
T303_02060	UDP pyrophosphate phosphatase	Chromosome:353642-354497	855	376.613	577.953	174.727	636.255	298.937	366.837
T303_02065	adapter protein mecA	Chromosome:355122-355872	750	41.9526	32.8713	417.753	87.7801	437.721	244.968
T303_02070	UDP-N-acetylglucosamine:UDP-P N-acetylglucosaminyl-1-P transferase	Chromosome:355875-357033	1158	63.5133	44.3413	523.07	121.526	550.52	386.935
T303_02075	iron ABC transporter ATP-binding protein	Chromosome:357159-357963	804	459.158	694.839	415.947	1251.2	439.277	385.17
T303_02080	Fe-S cluster assembly protein SufD	Chromosome:357999-359262	1263	603.28	591.214	641.373	1191.16	679.74	652.523
T303_02085	cysteine desulfurase	Chromosome:359315-360969	1654	506.584	400.629	575.644	766.608	647.11	759.393
T303_02090	Fe-S assembly protein NifU	Chromosome:359315-360969	1654	475.801	352.903	547.871	668.662	636.326	856.32
T303_02095	Fe-S cluster assembly protein SufB	Chromosome:361048-362467	1419	517.873	392.55	638.482	784.249	711.406	1020.65
T303_02100	hypothetical protein	Chromosome:362750-362891	141	0	0	0	0	22.8088	15.0857
T303_02105	membrane protein	Chromosome:363013-363983	970	4.80171	4.0594	5.22394	5.17012	8.5353	9.03748
T303_02110	membrane protein	Chromosome:363013-363983	970	16.8584	12.1234	11.5103	14.151	13.6798	23.1317
T303_02115	hypothetical protein	Chromosome:363993-364140	147	20.1026	8.90971	33.4837	6.18419	11.5396	12.4234
T303_02120	hypothetical protein	Chromosome:364313-364661	348	17.2541	7.34983	8.12666	11.9761	12.0262	18.8743
T303_02125	peptide ABC transporter permease	Chromosome:364749-365242	493	16.8761	15.939	14.0072	13.2003	15.2836	24.699
T303_02130	peptide ABC transporter ATP-binding protein	Chromosome:364749-365242	493	11.1973	8.39637	12.5449	12.0025	12.3952	21.8074
T303_02145	hypothetical protein	Chromosome:367137-367500	363	22.6649	75.0149	9.1883	45.6004	12.0448	166.63
T303_02150	heat shock protein Hsp33	Chromosome:367580-369417	1837	162.288	131.387	469.773	206.796	464.334	314.631
T303_02155	tRNA-dihydrouridine synthase	Chromosome:367580-369417	1837	155.721	116.715	477.846	203.219	482.689	416.71
T303_02160	peptidase	Chromosome:369645-370914	1269	51.2669	26.5563	221.884	45.0186	239.673	117.319
T303_02165	MarR family transcriptional regulator	Chromosome:371007-371463	456	629.27	918.63	168.956	965.313	179.536	317.176
T303_02170	zinc ABC transporter ATP-binding protein	Chromosome:371464-372977	1513	775.88	1157.36	144.573	1178.35	164.027	405.923
T303_02175	zinc ABC transporter permease	Chromosome:371464-372977	1513	865.274	1338.92	158.245	1277.96	180.686	428.665
T303_02180	malate transporter	Chromosome:373138-374077	939	24.0251	20.1966	55.477	25.2083	74.4769	55.2336
T303_02190	metal-dependent hydrolase	Chromosome:376415-377327	912	14.9904	16.3743	44.6068	31.3585	56.4755	74.8251
T303_02195	glucose-6-phosphate isomerase	Chromosome:377411-378785	1374	611.844	504.494	2193.08	875.385	2149.78	893.734
T303_02200	hypothetical protein	Chromosome:378963-379689	726	504.482	480.37	811.214	590.456	676.423	509.576
T303_02205	preprotein translocase subunit YajC	Chromosome:379814-380153	339	505.205	279.708	867.788	471.041	790.789	607.301
T303_02210	UDP pyrophosphate synthase	Chromosome:380281-381031	750	353.404	332.372	556.221	471.392	637.955	530.323
T303_02215	cytidylyltransferase	Chromosome:381043-381838	795	405.004	377.829	522.76	537.965	625.715	666.707
T303_02220	metalloprotease RseP	Chromosome:381854-383117	1263	485.768	397.722	611.217	701.41	765.585	1226.6
T303_02225	prolyl-tRNA synthetase	Chromosome:383187-385050	1863	597.793	532.369	752.679	888.153	910.254	1570.2
T303_02230	ABC transporter permease	Chromosome:385627-388410	2783	15.4968	15.3123	81.3282	29.0973	182.154	89.1747
T303_02235	ABC transporter ATP-binding protein	Chromosome:385627-388410	2783	18.6373	18.9324	75.3153	40.2442	187.079	115.14
T303_02240	molecular chaperone GroES	Chromosome:388577-388865	288	65085.7	148623	3042.74	165255	1813.58	72507.8
T303_02245	groEL; molecular chaperone GroEL	Chromosome:388913-390533	1620	0	0	4111.62	0	2811.45	0
T303_02265	hypothetical protein	Chromosome:391943-392252	309	26.1936	22.6444	89.1377	53.6845	151.46	181.902
T303_02270	hypothetical protein	Chromosome:392565-392682	117	0	94.6563	198.933	467.174	593.407	176.592
T303_02280	RNA pseudouridylate synthase	Chromosome:393578-394451	873	17.5668	13.9857	29.4576	29.4868	47.1115	29.7347
T303_02285	penicillin-binding protein 2A	Chromosome:394516-396844	2328	51.2439	31.5728	241.32	80.4681	243.429	149.061
T303_02290	secE; preprotein translocase subunit SecE	Chromosome:397053-397230	177	605.848	461.818	1183.67	745.584	854.248	958.525
T303_02295	transcription antitermination protein NusG	Chromosome:397426-397966	540	145.533	246.442	530.065	386.751	544.014	355.418
T303_02300	phosphoesterase	Chromosome:398087-398576	489	10.5111	17.7395	61.3773	29.2309	107.767	92.7205
T303_02310	cytochrome C	Chromosome:399512-400277	765	25.5889	42.1601	16.7948	58.672	26.7469	82.8823
T303_02315	leucyl-tRNA synthase	Chromosome:400450-402952	2502	181.718	261.809	550.171	499.478	648.919	387.186
T303_02330	nicotinate phosphoribosyltransferase	Chromosome:405179-406634	1455	32.1659	26.3853	209.487	79.3529	184.31	92.2967
T303_02335	nadE; NAD synthetase	Chromosome:406645-407467	822	42.1475	35.6707	269.268	104.158	247.388	160.122
T303_02340	membrane protein	Chromosome:407482-407923	441	100.31	79.2974	377.131	183.235	321.462	300.731
T303_02345	aminopeptidase C	Chromosome:408024-409362	1338	1630.83	1791.3	901.176	4679.83	617.482	579.113
T303_02350	penicillin-binding protein 1A	Chromosome:409471-412398	2927	486.43	481.157	671.715	762.041	658.202	638.479
T303_02355	Holliday junction resolvase	Chromosome:409471-412398	2927	426.795	251.712	726.579	495.654	690.953	465.659
T303_02360	hypothetical protein	Chromosome:412474-412990	516	7.51618	8.06535	21.0887	13.7115	33.2323	22.9606
T303_02365	cell division protein GpsB	Chromosome:413098-413431	333	167.879	131.78	692.924	239.691	834.999	613.554
T303_02370	bacterial RNase P	Chromosome:413442-413825	383	0	0	44488.4	0	35340.3	0
T303_02375	RNA methyltransferase	Chromosome:413957-415130	1173	86.371	71.3608	332.127	158.112	480.724	363.674
T303_02380	hypothetical protein	Chromosome:415132-416995	1863	354.175	230.612	1036.68	511.725	1195.6	1431.55
T303_02385	RNA helicase	Chromosome:417104-420200	3096	743.566	770.095	245.96	1278.09	222.918	352.746
T303_02390	hypothetical protein	Chromosome:420355-421072	717	1327.89	1187.43	708.934	2025.93	1033.82	1836.36
T303_02395	UDP-N-acetylmuramate--alanine ligase	Chromosome:421083-422427	1344	1360.72	1234.29	772.913	2194.66	1210.84	2590.15
T303_02400	GNAT family acetyltransferase	Chromosome:422512-422980	468	675.536	594.836	111.895	463.73	178.585	188.395
T303_02405	aminodeoxychorismate lyase	Chromosome:423079-425056	1977	889.106	960.11	831.628	787.814	1135.72	988.221
T303_02410	transcription elongation factor GreA	Chromosome:425140-425721	581	1221.63	2663.13	1024.07	1853.46	1329.69	1673.01
T303_02415	hypothetical protein	Chromosome:425140-425721	581	1742.52	6301.98	2465.52	10609.1	5305.27	12840.7
T303_02420	transposase	Chromosome:425867-426014	147	0	0	13.4866	0	22.0243	11.0705
T303_02430	cytochrome oxidase biogenesis protein OxaA	Chromosome:426572-427490	918	82.312	85.905	705.422	200.781	770.061	383.422
T303_02435	acylphosphatase	Chromosome:427576-427855	279	8.17761	9.55249	6.07958	20.4585	8.06309	43.0085
T303_02440	23S rRNA methyltransferase	Chromosome:427957-428695	738	1663.75	1849.98	798.296	2719.24	791.951	1198.15
T303_02450	membrane protein	Chromosome:429323-430013	690	2300.92	3277.35	968.231	3631.36	822.842	1851.22
T303_02455	hypothetical protein	Chromosome:430123-430402	279	89.8031	27.4563	15.3742	25.0347	16.9754	13.6714
T303_02460	hypothetical protein	Chromosome:430794-431196	402	68.91	32.087	13.5192	28.4409	14.874	24.6177
T303_02465	diaminopimelate decarboxylase	Chromosome:431307-432573	1266	106.21	79.5182	187.316	95.4213	232.965	125.182
T303_02470	TetR family transcriptional regulator	Chromosome:432601-433141	540	10.0838	3.38782	4.18358	3.70919	7.58986	9.39701
T303_02475	hypothetical protein	Chromosome:433381-433627	246	1515.12	1002.07	1037.01	1198.59	625.789	367.049
T303_02480	glutamate racemase	Chromosome:433692-438459	4767	854.519	1076.36	437.505	1098.57	303.464	249.343
T303_02485	deoxyribonucleotide triphosphate pyrophosphatase	Chromosome:433692-438459	4767	1148.78	1478.09	378.235	1747.94	250.751	379.896
T303_02490	metallophosphoesterase	Chromosome:433692-438459	4767	1631.6	1859.23	537.023	2324.51	364.533	576.834
T303_02495	hypothetical protein	Chromosome:433692-438459	4767	1767.13	1957.54	551.686	2502.36	388.902	667.244
T303_02500	tyrosine recombinase XerD	Chromosome:433692-438459	4767	1620.35	1800.5	501.641	2151.32	347.464	686.46
T303_02505	scpA; segregation and condensation protein A	Chromosome:433692-438459	4767	1382.35	1530.55	398.779	1793.87	291.903	687.087
T303_02510	segregation protein A	Chromosome:433692-438459	4767	1489.81	1838.79	426.643	2001.56	320.044	995.44
T303_02515	ribosomal large subunit pseudouridine synthase B	Chromosome:438509-439525	1016	1318.46	2141.24	392.378	2243.62	297.552	1169.42
T303_02520	membrane protein	Chromosome:438509-439525	1016	2367.31	4000.54	702.063	4154.73	532.601	2271.14
T303_02525	potassium transporter Trk	Chromosome:439547-440987	1440	64.4011	81.9936	184.57	122.015	255.806	225.795
T303_02530	potassium transporter TrkA	Chromosome:440993-442343	1350	41.3423	59.1281	173.483	100.305	212.275	134.429
T303_02535	RNA methyltransferase	Chromosome:442586-443141	555	19.109	20.0644	114.345	38.2482	197.018	105.02
T303_02540	riboflavin transporter	Chromosome:443451-444009	558	15.5983	16.9151	23.2756	29.5837	34.3705	32.6439
T303_02545	phosphatase	Chromosome:444011-444662	651	23.7853	51.697	37.6592	50.588	57.7426	69.536
T303_02550	XRE family transcriptional regulator	Chromosome:444856-445756	900	35.6602	28.911	21.4267	34.099	41.6642	37.639
T303_02560	membrane protein	Chromosome:448132-448465	333	16.9862	16.9146	244.928	72.2825	322.882	236.037
T303_02570	hypothetical protein	Chromosome:449531-449903	372	34.9758	41.5116	80.025	48.4738	133.357	67.029
T303_02575	urease accessory protein	Chromosome:450307-450823	516	40.6238	56.9174	301.074	93.6778	367.567	125.89
T303_02580	ureA; urease subunit gamma	Chromosome:450847-451150	303	39.4261	60.7173	235.606	113.679	275.196	168.691
T303_02585	urease subunit beta	Chromosome:451161-451473	312	66.039	94.3976	423.186	181.691	502.454	244.216
T303_02590	urease subunit alpha	Chromosome:451488-453207	1719	67.8768	68.188	382.515	155.833	439.547	221.473
T303_02595	urease accessory protein UreE	Chromosome:453293-454503	1210	47.8003	56.6986	267.099	122.384	357.33	195.065
T303_02600	urease accessory protein UreF	Chromosome:453293-454503	1210	52.8086	64.143	257.266	122.896	325.835	206.673
T303_02605	urease accessory protein UreG	Chromosome:454532-455147	615	62.5739	84.0436	263.843	160.446	343.032	230.645
T303_02610	urease accessory protein UreD	Chromosome:455148-455988	840	81.2671	103.798	303.223	203.496	385.944	264.208
T303_02615	cobalt transporter CbiM	Chromosome:455991-457745	1754	100.365	136.94	315.105	243.586	389.486	328.374
T303_02620	cobalt ABC transporter permease	Chromosome:455991-457745	1754	132.282	186.256	397.651	310.756	493.533	400.455
T303_02625	cobalt ABC transporter ATP-binding protein	Chromosome:457746-458460	714	165.046	245.723	413.111	449.537	500.947	500.223
T303_02630	amino acid ABC transporter substrate-binding protein	Chromosome:458624-459473	849	20.3454	15.2263	248.449	30.0703	176.789	25.4694
T303_02635	peptide synthetase	Chromosome:459662-464197	4535	42.1786	36.8658	274.732	59.0247	266.885	54.923
T303_02640	NUDIX hydrolase	Chromosome:459662-464197	4535	42.9786	49.2706	385.593	82.9248	394.934	74.4259
T303_02645	macrolide ABC transporter permease	Chromosome:464222-465431	1209	23.2665	21.0094	286.544	36.6268	307.71	37.3319
T303_02655	amino acid ABC transporter substrate-binding protein	Chromosome:466137-466986	849	48.0534	56.1245	710.003	117.013	640.821	178.857
T303_02660	O-sialoglycoprotein endopeptidase	Chromosome:467145-468048	903	110.297	130.964	1329.25	264.423	1420.92	490.343
T303_02670	methionine ABC transporter ATP-binding protein	Chromosome:469475-471235	1760	85.6286	78.4111	1080.43	180.544	1232.64	521.057
T303_02675	methionine ABC transporter permease	Chromosome:469475-471235	1760	89.9939	56.1578	1432.34	166.295	1694.14	665.228
T303_02680	serine/threonine transporter SstT	Chromosome:471357-472566	1209	121.193	108.32	111.801	137.719	239.016	244.268
T303_02685	DNA-directed RNA polymerase subunit delta	Chromosome:472718-473567	849	39.5449	67.105	79.7639	121.152	191.343	263.104
T303_02690	membrane protein	Chromosome:473576-474122	546	32.9721	40.1517	61.1162	75.8518	148.022	184.151
T303_02695	heme ABC transporter ATP-binding protein	Chromosome:474157-476687	2530	37.1208	39.8285	87.9804	80.9562	235.036	240.983
T303_02700	cobalt ABC transporter permease	Chromosome:474157-476687	2530	20.9127	19.307	72.4008	45.4864	194.585	189.392
T303_02705	transketolase	Chromosome:476896-478873	1977	128.906	90.7972	561.484	250.275	634.318	238.372
T303_02710	potassium transporter Trk	Chromosome:479119-479791	672	328.97	118.795	556.294	347.82	389.691	245.697
T303_02715	V-type Na+ -ATPase subunit J	Chromosome:479830-481216	1386	207.722	81.5962	336.364	245.124	246.729	170.454
T303_02720	16S rRNA methyltransferase	Chromosome:481264-481978	714	134.537	72.675	316.352	211.737	225.458	147.203
T303_02725	DNA-binding protein	Chromosome:482273-482810	537	48.3337	51.0974	453.499	108.803	513.036	160.197
T303_02730	PhoB family transcriptional regulator	Chromosome:482965-485169	2204	110.136	101.873	1218.62	260.721	1239.21	530.209
T303_02735	sensor histidine kinase	Chromosome:482965-485169	2204	21.9058	21.3175	243.132	60.8385	282.431	130.35
T303_02740	NrdR family transcriptional regulator	Chromosome:485290-486942	1652	99.2238	101.407	445.272	260.583	512.582	494.739
T303_02745	chromosome replication initiation / membrane attachment protein DnaB	Chromosome:485290-486942	1652	184.86	198.584	409.453	426.079	533.048	735.336
T303_02750	primosomal protein DnaI	Chromosome:486945-487848	903	231.532	218.153	474.923	488.889	641.257	940.147
T303_02755	engA; GTP-binding protein Der	Chromosome:487953-489264	1311	297.066	301.553	593.029	638.029	829.249	1377.45
T303_02785	seryl-tRNA synthase	Chromosome:492641-493967	1326	1891.93	2631.07	396.183	2807.93	406.456	509.477
T303_02790	mannose operon ManO protein	Chromosome:494127-494502	375	67.2418	77.7091	56.2164	52.052	65.7819	36.6076
T303_02795	PTS mannose transporter subunit IID	Chromosome:494580-495492	912	1386.28	532.478	325.43	965.632	359.39	2073.89
T303_02800	PTS mannose transporter subunit IIC	Chromosome:495506-496334	828	835.822	497.418	194.701	925.463	207.661	2627.53
T303_02805	PTS mannose transporter subunit IIAB	Chromosome:496401-497394	993	991.539	704.652	282.688	1383.95	283.098	3022.04
T303_02810	cyclase	Chromosome:497770-498502	732	57.4797	50.5099	94.3906	158.791	84.7428	74.6707
T303_02815	HAD hydrolase	Chromosome:498546-499359	813	124.142	92.0267	336.097	149.195	296.786	152.653
T303_02820	guanine permease	Chromosome:499567-500989	1422	18.0885	18.969	230.057	45.7383	267.842	117.107
T303_02825	hydrolase	Chromosome:501260-502218	958	108.407	78.3089	295.504	172.587	455.987	219.968
T303_02830	GNAT family acetyltransferase	Chromosome:501260-502218	958	153.919	116.121	260.455	220.995	384.777	323.67
T303_02835	transcriptional regulator	Chromosome:502226-503453	1227	244.495	229.829	334.761	353.188	502.083	685.36
T303_02840	ribosome maturation protein RimP	Chromosome:503575-504067	492	191.461	287.143	357.881	425.869	466.794	327.153
T303_02845	transcription elongation factor NusA	Chromosome:504132-505320	1188	225.359	334.214	459.588	528.358	651.71	500.168
T303_02850	hypothetical protein	Chromosome:505337-505932	595	249.208	371.627	443.713	590.086	655.877	614.474
T303_02855	hypothetical protein	Chromosome:505337-505932	595	270.52	397.078	496.712	603.996	765.057	692.546
T303_02860	translation initiation factor IF-2	Chromosome:505950-508782	2832	371.536	621.953	569.285	910.224	907.727	1021.08
T303_02865	ribosome-binding factor A	Chromosome:508875-509229	354	248.537	429.727	543.864	822.519	890.02	863.591
T303_02880	UDP-N-acetylmuramoylalanyl-D-glutamate--2,6-diaminopimelate ligase	Chromosome:511451-512897	1446	421.7	305.843	367.972	461.385	294.456	285.589
T303_02885	polysaccharide transporter	Chromosome:512991-514623	1632	21.4398	17.9159	330.507	59.2517	247.066	170.084
T303_02890	hydrolase	Chromosome:514646-515258	612	2.95399	3.68709	3.02398	2.68867	8.00842	15.5843
T303_02895	cystathionine gamma-synthase	Chromosome:515561-517830	2269	52.0345	17.8147	120.027	66.0965	110.175	58.6825
T303_02900	cysteine desulfhydrase	Chromosome:515561-517830	2269	54.2682	18.004	110.658	53.7525	109.073	73.0583
T303_02905	hypothetical protein	Chromosome:517963-518389	426	41.9846	20.1788	84.7662	35.0676	77.7273	39.4166
T303_02910	uracil phosphoribosyltransferase	Chromosome:518518-519148	630	1516.34	1398.25	1068.8	2605.94	736.805	1973.66
T303_02915	ATP-dependent Clp protease proteolytic subunit	Chromosome:519285-519876	591	3440.17	4109.95	1784.15	6122.51	1151.96	9942.17
T303_02920	hypothetical protein	Chromosome:519962-520686	724	130.117	77.623	517.321	118.964	494.578	235.453
T303_02925	hypothetical protein	Chromosome:519962-520686	724	48.4618	23.1394	152.403	38.7217	135.958	117.318
T303_02930	branched-chain amino acid ABC transporter substrate-binding protein	Chromosome:520842-522018	1176	50.6503	54.3012	194.798	82.1312	187.054	139.905
T303_02935	ABC transporter permease	Chromosome:522061-522946	885	81.3219	75.04	201.215	115.698	210.863	185.426
T303_02940	branched-chain amino acid ABC transporter permease	Chromosome:522949-523900	951	125.318	122.546	235.232	183.701	271.261	264.083
T303_02945	branched-chain amino acid ABC transporter ATP-binding protein	Chromosome:523902-525377	1475	164.521	159.72	279.23	258.532	335.558	338.296
T303_02950	amino acid ABC transporter ATPase	Chromosome:523902-525377	1475	193.03	162.733	291.94	272.578	345.439	297.941
T303_02960	cysteine synthase	Chromosome:526339-527272	933	160.497	165.778	467.275	258.078	342.405	188.906
T303_02965	Xaa-Pro dipeptidase	Chromosome:527367-527994	627	121.151	160.574	113.279	203.278	123.773	138.58
T303_02970	competence protein	Chromosome:528048-530011	1963	48.8661	98.001	22.7663	100.627	25.4835	47.9415
T303_02975	competence protein	Chromosome:528048-530011	1963	47.0907	45.9372	25.5723	86.4838	28.6657	91.8324
T303_02985	16S ribosomal RNA	Chromosome:531046-532593	1547	0	0	0	0	0	0
T303_02990	tRNA-Ala	Chromosome:532644-532717	73	0	0	0	0	0	0
T303_02995	23S ribosomal RNA	Chromosome:532862-535764	2902	0	0	0	0.0168604	0	0
T303_03000	5S ribosomal RNA	Chromosome:535846-535962	116	0	0	0	0	0	0
T303_03005	tRNA-Asn	Chromosome:535967-536041	74	0	0	0	0	0	0
T303_03010	tRNA-Leu	Chromosome:536230-536312	82	0	0	0	0	0	0
T303_03015	tRNA-Thr	Chromosome:536327-536400	73	0	0	0	0	0	0
T303_03020	tRNA-Glu	Chromosome:536407-536479	72	0	0	0	0	0	0
T303_03025	inorganic diphosphatase PpaC	Chromosome:536568-537501	933	470.848	283.803	1254.3	739.208	835.957	502.716
T303_03030	hypothetical protein	Chromosome:537554-538214	660	59.6371	18.5742	25.3495	16.7784	48.5865	5.5707
T303_03035	hypothetical protein	Chromosome:538243-538777	534	730.529	685.404	988.088	890.791	950.156	636.098
T303_03040	recX; recombinase RecX	Chromosome:538847-539624	777	86.6365	28.1368	90.0708	64.2657	65.8298	42.7234
T303_03045	RNA methyltransferase	Chromosome:539658-541023	1365	161.369	104.726	159.684	200.931	173.085	115.254
T303_03050	aspartate--ammonia ligase	Chromosome:541121-542114	993	408.349	458.242	2217.07	1171.3	2075.9	1052.65
T303_03055	aspartate kinase	Chromosome:542265-543624	1359	52.0826	26.3241	173.419	33.9438	200.005	58.0442
T303_03060	HAD family hydrolase	Chromosome:543755-544394	639	342.363	384.088	141.17	390.294	146.932	718.06
T303_03065	enoyl-CoA hydratase	Chromosome:544606-545398	792	513.961	760.011	335.841	967.388	501.643	629.356
T303_03070	MarR family transcriptional regulator	Chromosome:545501-546898	1397	684.585	918.855	1128.48	1283.6	2083.05	1710.64
T303_03075	3-oxoacyl-ACP synthase	Chromosome:545501-546898	1397	445.151	593.552	714.138	725.046	1291.78	1259
T303_03080	acyl carrier protein	Chromosome:546961-547186	225	1316.77	1344.24	1804.52	2358.04	2551.49	2877.21
T303_03085	2-nitropropane dioxygenase	Chromosome:547291-548257	966	1114	903.801	560.659	1191.08	695.581	951.594
T303_03090	ACP S-malonyltransferase	Chromosome:548273-549200	927	1399.36	801.007	567.901	1107.5	726.787	961.935
T303_03095	3-ketoacyl-ACP reductase	Chromosome:549212-549947	735	1468.28	812.197	563.816	1104.23	714.123	1216.58
T303_03100	3-oxoacyl-ACP synthase	Chromosome:550008-551241	1233	1429.55	828.69	569.521	1077.87	730.618	1485.78
T303_03105	acetyl-CoA carboxylase biotin carboxyl carrier protein subunit	Chromosome:551244-552155	911	1286.52	714.937	544.106	875.829	702.878	1630.2
T303_03110	3-hydroxyacyl-ACP dehydratase	Chromosome:551244-552155	911	1769.6	825.458	682.514	1038.43	866.624	1139.4
T303_03115	acetyl-CoA carboxylase biotin carboxylase subunit	Chromosome:552259-553645	1386	605.729	301.134	398.536	397.494	484.165	370.61
T303_03120	acetyl-CoA carboxylase subunit beta	Chromosome:553650-555284	1634	621.687	298.313	421.899	369.126	509.122	358.408
T303_03125	acetyl-CoA carboxylase subunit alpha	Chromosome:553650-555284	1634	716.797	300.212	511.984	379.902	629.291	375.457
T303_03130	S-ribosylhomocysteinase	Chromosome:555314-555797	483	1707.69	1744.34	777.802	3820.4	683.969	681.417
T303_03140	ribonuclease	Chromosome:557417-559025	1608	49.6214	45.6516	759.858	142.208	936.806	733.804
T303_03150	DeoR family transcriptional regulator	Chromosome:560452-562107	1655	906.725	1893.2	668.412	2416.72	782.379	7990.78
T303_03155	6-phosphofructokinase	Chromosome:560452-562107	1655	1312.46	2098.97	691.139	2362.76	983.562	10338.1
T303_03165	glutathione reductase	Chromosome:564233-565586	1353	1105.59	1106.74	515.975	1027.79	450.788	686.716
T303_03170	folylpolyglutamate synthase	Chromosome:565687-566944	1257	333.516	172.678	178.01	206.503	128.659	75.083
T303_03175	hypothetical protein	Chromosome:566989-567532	543	327.358	179.541	631.307	315.615	353.432	179.781
T303_03180	aminotransferase V	Chromosome:567640-568786	1146	41.8742	43.7755	188.422	87.1007	245.598	92.8152
T303_03185	thiamine biosynthesis protein ThiI	Chromosome:568840-570064	1224	129.707	189.402	236.987	242.306	306.621	180.418
T303_03190	glycosyl transferase family 4	Chromosome:570169-572993	2824	261.814	458.773	269.531	513.877	363.544	311.195
T303_03195	accessory Sec system glycosyltransferase GtfB	Chromosome:570169-572993	2824	365.849	726.792	300.52	807.034	412.382	459.401
T303_03200	hypothetical protein	Chromosome:573305-573533	228	22.3348	17.6494	33.4142	37.1859	51.1144	42.5493
T303_03205	50S ribosomal protein L21	Chromosome:573762-574077	315	1048.84	1793.29	4239.12	3561.86	4233.52	2961.89
T303_03210	50S ribosomal protein L27	Chromosome:574113-574404	291	2523.59	4109.91	7742.03	8351.86	8092.03	6420.4
T303_03215	acetyltransferase	Chromosome:574462-575158	696	185.509	116.254	36.4159	196.877	56.5845	186.924
T303_03220	transposase	Chromosome:575358-575733	375	99.0723	75.457	420.938	139.072	415.107	124.162
T303_03230	dihydrodipicolinate reductase	Chromosome:576636-578609	1973	156.746	126.319	549.927	225.539	596.197	350.986
T303_03235	CCA-adding protein	Chromosome:576636-578609	1973	134.51	115.199	249.097	139.668	292.848	182.491
T303_03240	antibiotic ABC transporter ATP-binding protein	Chromosome:578686-580567	1881	48.3132	37.6408	93.4953	46.2762	124.447	56.2198
T303_03245	hypothetical protein	Chromosome:580648-581152	504	1426.28	462.755	2009.99	979.272	1013.13	1945.74
T303_03250	DNA mismatch repair protein MutT	Chromosome:581228-581981	753	11.1636	6.36748	5.93842	11.5301	9.08557	14.9101
T303_03255	transcriptional regulator	Chromosome:582044-583151	1107	5.35091	2.97537	8.09169	7.4185	11.283	15.0549
T303_03260	glutamate dehydrogenase	Chromosome:583476-584847	1371	2210.19	2084.75	2581.33	4038.42	2072.44	1287.97
T303_03265	peptide deformylase	Chromosome:585104-585515	411	317.953	681.743	126.526	708.139	126.198	1457.97
T303_03270	MarR family transcriptional regulator	Chromosome:585704-586148	444	47.4387	49.2527	54.7981	70.0828	65.5535	84.2082
T303_03275	ABC transporter	Chromosome:586151-589734	3583	86.9621	86.5869	55.6609	120.404	63.8219	119.473
T303_03280	ABC transporter	Chromosome:586151-589734	3583	121.549	124.715	65.0464	154.69	81.6647	152.747
T303_03295	pyrH; uridylate kinase	Chromosome:591681-592419	738	266.204	262.804	625.862	424.694	656.435	395.226
T303_03300	ribosome recycling factor	Chromosome:592433-592991	558	337.901	306.419	869.974	491.066	922.454	508.082
T303_03305	S1 RNA-binding protein	Chromosome:593039-593939	900	487.73	481.66	1053.71	719.54	1153.57	462.311
T303_03310	hypothetical protein	Chromosome:593947-594163	216	329.936	278.078	659.557	422.583	638.323	307.06
T303_03315	peptigoglycan-binding protein LysM	Chromosome:594403-595879	1476	870.079	702.398	3647.08	1169.58	4218.72	2607.66
T303_03320	hypothetical protein	Chromosome:596090-596636	546	147.15	23.8196	182.991	35.2545	390.127	275.046
T303_03325	phosphate starvation-inducible protein PhoH	Chromosome:596715-597777	1062	77.7716	36.1448	301.565	89.8418	360.332	166.367
T303_03330	hypothetical protein	Chromosome:598056-598215	159	80.2468	32.4896	97.5029	71.6967	133.144	124.349
T303_03335	hypothetical protein	Chromosome:598986-599400	414	26.366	10.5977	40.0567	23.2305	62.0083	59.9566
T303_03340	hypothetical protein	Chromosome:599849-600490	641	7.1722	9.26678	19.6065	10.4516	27.6452	15.1323
T303_03345	hypothetical protein	Chromosome:599849-600490	641	5.27574	3.04605	27.6086	6.62908	29.408	15.7844
T303_03350	methionyl-tRNA synthetase	Chromosome:600683-602687	2004	129.581	163.024	444.769	349.083	468.407	224.584
T303_03355	LysR family transcriptional regulator	Chromosome:602964-603861	897	4.20167	2.07517	14.6587	6.29942	19.1207	24.6974
T303_03360	hypothetical protein	Chromosome:604291-604501	210	2.75942	1.49829	1.01758	4.20025	4.52633	5.88995
T303_03365	competence protein CoiA	Chromosome:605074-606118	1044	1.06641	1.95969	0.660308	2.01193	1.98857	4.94099
T303_03370	oligopeptidase PepB	Chromosome:606128-608082	1954	137.565	190.058	274.591	264.116	302.907	217.705
T303_03375	hypothetical protein	Chromosome:606128-608082	1954	0	0	0	8.23725	5.47869	4.04024
T303_03380	O-methyltransferase	Chromosome:608115-608823	708	31.9764	15.2708	459.067	50.7583	306.648	235.285
T303_03385	protease maturation protein	Chromosome:608884-610027	1143	47.5979	32.8103	1003.61	102.202	853.309	486.577
T303_03390	alaS; alanyl-tRNA synthase	Chromosome:610368-612987	2619	609.317	627.045	690.81	722.738	622.126	945.554
T303_03395	hypothetical protein	Chromosome:613154-613370	216	2415.12	4275.16	61.4504	3719.24	41.3753	2061.6
T303_03405	hypothetical protein	Chromosome:614943-615213	270	38.2518	81.6587	49.6907	87.1956	39.9029	37.7637
T303_03410	cell wall protein	Chromosome:615252-615912	660	30.0776	62.7209	38.3266	63.9266	31.7832	34.761
T303_03415	hydrolase	Chromosome:616043-616832	789	142.626	165.06	120.349	246.936	111.098	116.171
T303_03420	diaminopimelate aminotransferase	Chromosome:616841-618023	1182	154.756	135.116	129.901	222.452	116.583	154.809
T303_03425	N-acetyl-gamma-glutamyl-phosphate reductase	Chromosome:618151-619174	1023	20.8578	16.6265	14.2863	18.4649	55.1263	10.7681
T303_03430	N-acetylglutamate synthase	Chromosome:619202-620396	1194	31.6617	28.7754	11.0938	34.9411	54.9266	22.1811
T303_03435	acetylglutamate kinase	Chromosome:620422-621160	738	28.7499	28.031	10.2453	35.2458	37.512	26.4742
T303_03440	argD; acetylornithine aminotransferase	Chromosome:621163-622294	1131	28.7198	32.4268	12.5935	38.9475	35.285	35.5924
T303_03445	polysaccharide deacetylase	Chromosome:622334-623213	879	8.51665	9.96184	71.5375	30.5124	93.9534	61.0276
T303_03450	homoserine dehydrogenase	Chromosome:623386-624673	1287	63.4011	56.3742	256.196	117.289	261.888	107.008
T303_03455	homoserine kinase	Chromosome:624756-626494	1738	74.1265	76.1943	220.363	135.189	280.588	177.689
T303_03460	chloramphenicol-sensitivity protein (RarD) family protein	Chromosome:624756-626494	1738	79.2468	71.0243	156.981	141.213	184.094	152.719
T303_03465	hypothetical protein	Chromosome:626606-627224	618	142.856	63.1604	586.624	194.564	680.143	389.571
T303_03470	hypothetical protein	Chromosome:627358-627562	204	565.09	277.591	579.731	591.593	672.269	1702.62
T303_03485	valyl-tRNA synthetase	Chromosome:629176-631828	2652	933.857	1096.27	851.626	1487.56	669.977	1380.57
T303_03490	hypothetical protein	Chromosome:631847-631979	132	128.426	30.7247	11.9681	49.4224	10.6977	71.4347
T303_03495	F0F1 ATP synthase subunit C	Chromosome:632004-632202	198	1574.63	1360.08	3782.91	2473.41	2197.09	5003.21
T303_03500	F0F1 ATP synthase subunit A	Chromosome:632236-632944	708	847.342	550.595	2217.68	1036.23	1398.59	2056.27
T303_03505	F0F1 ATP synthase subunit B	Chromosome:632964-633998	1034	1940.89	1261.57	4541.3	2409.7	2981.54	5378.37
T303_03510	F0F1 ATP synthase subunit delta	Chromosome:632964-633998	1034	1697.1	1019.47	3544.45	1989.35	2339.12	4238.85
T303_03515	F0F1 ATP synthase subunit alpha	Chromosome:634013-635519	1506	3223.64	1682.5	4853.42	3518.13	3137.71	7047.54
T303_03520	F0F1 ATP synthase subunit gamma	Chromosome:635537-636416	879	3234.11	1348.41	4275.91	2860.27	2850.26	6305.15
T303_03525	F0F1 ATP synthase subunit beta	Chromosome:636492-637899	1407	4094.6	1576.46	5078.71	3252.35	3397.17	7053.18
T303_03530	F0F1 ATP synthase subunit epsilon	Chromosome:637911-638358	447	4209.01	1203.94	5619.12	2483.18	3726.94	3603.14
T303_03535	cell division protein	Chromosome:638593-639889	1296	105.261	119.881	263.612	127.026	401.348	410.756
T303_03540	tuf; elongation factor Tu	Chromosome:640126-641323	1197	14208.9	27247.8	0	26489.3	0	0
T303_03545	triosephosphate isomerase	Chromosome:641571-642330	759	1016.89	1118.11	3070.44	2222.29	2804.64	1234.79
T303_03550	thymidylate kinase	Chromosome:642569-643199	630	383.978	344.542	165.677	371.103	138.424	68.9187
T303_03555	DNA polymerase III subunit delta'	Chromosome:643207-645193	1986	454.286	459.482	232.085	517.937	201.968	100.902
T303_03560	signal peptidase II	Chromosome:643207-645193	1986	416.187	378.166	277.157	481.194	245.041	122.158
T303_03565	DNA replication initiation control protein YabA	Chromosome:643207-645193	1986	325.319	161.157	290.437	287.366	249.367	110.466
T303_03570	16S rRNA methyltransferase	Chromosome:645195-646062	867	187.704	69.9526	288.545	142.864	256.283	101.069
T303_03575	ammonia permease	Chromosome:646150-647434	1284	1.5953	1.44549	1.09663	2.11407	1.75678	1.39665
T303_03580	nitrogen regulatory protein P-II	Chromosome:647444-647786	342	9.52109	6.4293	6.6404	7.5347	9.32157	8.45555
T303_03585	peptidoglycan hydrolase	Chromosome:647883-649384	1501	38.6404	39.0218	349.659	70.8319	278.305	111.723
T303_03590	haloacid dehalogenase	Chromosome:647883-649384	1501	106.423	148.191	489.062	215.492	386.944	252.742
T303_03600	hypothetical protein	Chromosome:649909-650679	770	24.0921	25.3899	16.1526	1.45288	16.9839	23.8108
T303_03605	phosphate transporter	Chromosome:649909-650679	770	27.098	28.1105	14.785	15.9787	26.3102	46.5842
T303_03610	N-acetylglucosamine-6-phosphate deacetylase	Chromosome:650745-651912	1167	88.9562	92.1121	49.4622	118.799	45.8275	32.9981
T303_03615	hypothetical protein	Chromosome:652016-652340	324	82.2136	62.9434	217.646	79.9318	174.177	109.497
T303_03620	hypothetical protein	Chromosome:652359-652515	156	89.4806	82.503	339.398	126.615	275.466	155.376
T303_03630	glyQ; glycyl-tRNA synthase subunit alpha	Chromosome:653541-654459	918	1121.95	1238.47	398.477	1653.42	453.2	1168.21
T303_03635	glycyl-tRNA synthase subunit beta	Chromosome:654742-656779	2037	1397.91	1616.58	524.395	1864.78	562.917	1403.08
T303_03640	hypothetical protein	Chromosome:656791-657049	258	2069.45	2386.96	779.241	2654.05	787.577	1435.46
T303_03645	amino acid transporter	Chromosome:657210-658611	1401	257.249	108.108	368.278	245.138	492.32	336.13
T303_03650	nucleotidyltransferase	Chromosome:658681-659317	636	69.5417	69.6273	344.514	331.033	872.915	1563.82
T303_03660	peptidyl-prolyl cis-trans isomerase	Chromosome:661561-662320	759	59.7177	87.176	202.25	130.174	161.209	105.854
T303_03665	transposase IS3	Chromosome:662423-663293	870	0	0	0	0	0	0
T303_03670	transposase IS3	Chromosome:663307-664048	741	5.25018	9.16616	1.90881	10.3145	2.59618	4.12833
T303_03675	hypothetical protein	Chromosome:664368-664632	264	16.1723	9.77031	14.3716	22.3117	24.0605	24.8458
T303_03680	membrane protein	Chromosome:664695-665944	1249	8.74042	5.66427	5.59397	12.7454	13.5348	19.0879
T303_03685	hypothetical protein	Chromosome:664695-665944	1249	11.9938	7.24337	10.2074	14.8776	23.9904	32.9903
T303_03690	hypothetical protein	Chromosome:664695-665944	1249	10.3573	8.64634	15.864	15.5686	38.8114	52.1793
T303_03695	LysR family transcriptional regulator	Chromosome:666050-666965	915	106.807	82.8915	236.458	135.679	207.674	164.414
T303_03700	signal peptidase II	Chromosome:666973-668309	1336	116.25	77.2454	237.502	122.719	222.786	183.3
T303_03705	RNA pseudouridine synthase	Chromosome:666973-668309	1336	179.96	118.291	393.125	202.072	372.958	371.253
T303_03710	phosphoribosyl transferase	Chromosome:668531-669053	522	84.3247	63.6056	351.872	100.543	261.498	89.6858
T303_03715	uracil transporter	Chromosome:669367-670678	1311	150.586	84.2771	440.898	175.326	419.459	139.877
T303_03720	aspartate carbamoyltransferase catalytic subunit	Chromosome:670702-671629	927	233.433	139.409	572.895	285.984	630.176	214.49
T303_03725	carbamoyl phosphate synthase small subunit	Chromosome:671781-672870	1089	251.311	154.767	636.681	323.43	819.372	252.188
T303_03730	carbamoyl phosphate synthase large subunit	Chromosome:673214-676394	3180	271.795	173.684	738.786	387.671	1137.84	346.161
T303_03735	transposase IS1193	Chromosome:676465-677722	1257	0	0	0	0	0	0
T303_03740	SAM-dependent methyltransferase	Chromosome:677932-678691	759	4.47985	2.60098	11.0536	6.87129	30.7501	33.3174
T303_03745	hypothetical protein	Chromosome:678842-679311	469	37.6958	11.9018	18.624	53.7782	112.491	92.1521
T303_03750	hypothetical protein	Chromosome:678842-679311	469	4.36867	1.39394	10.2057	6.78353	28.1576	30.0259
T303_03755	ABC transporter substrate-binding protein	Chromosome:679550-679796	246	5.9857	4.52663	15.0739	9.56684	50.9745	57.4198
T303_03765	hypothetical protein	Chromosome:680111-680216	105	0	0	0	0	0	0
T303_03770	macrolide ABC transporter	Chromosome:680370-680831	461	4.50503	3.06106	18.7025	5.66411	47.0581	43.597
T303_03775	membrane protein	Chromosome:680370-680831	461	10.0993	9.70988	27.861	12.8512	91.1801	90.6718
T303_03780	50S ribosomal protein L10	Chromosome:681054-681624	570	941.074	1972.02	4994	2103.47	6361.44	2758.25
T303_03785	rplL; 50S ribosomal protein L7/L12	Chromosome:681683-682067	384	1407.21	3150.52	5764.03	3308.23	7629.47	3601.56
T303_03795	peptide ABC transporter ATP-binding protein	Chromosome:684343-685018	675	0	0	0	0	0.0521125	0.0826079
T303_03800	ABC transporter permease	Chromosome:685022-686069	1047	34.5867	58.3515	9.11148	58.6538	8.69706	19.789
T303_03805	hypothetical protein	Chromosome:686758-687046	288	147.382	109.168	115.255	154.662	92.0228	72.4851
T303_03810	hypothetical protein	Chromosome:687067-688238	1171	329.997	373.873	257.288	429.017	230.134	247.402
T303_03815	hypothetical protein	Chromosome:687067-688238	1171	352.378	432.97	253.988	487.469	237.185	307.262
T303_03820	Mucus binding protein	Chromosome:688630-691567	2937	512.756	717.1	591.642	1224.41	472.978	600.867
T303_03825	hypothetical protein	Chromosome:691924-692029	105	0	0	0	0	0	0
T303_03830	multidrug ABC transporter ATP-binding protein	Chromosome:692613-694350	1737	2.72527	4.11847	27.693	13.6536	52.9483	52.2375
T303_03835	ABC transporter	Chromosome:694362-696150	1788	5.71338	7.75598	41.8952	25.2008	83.5992	73.0602
T303_03840	S-adenosylmethionine tRNA ribosyltransferase	Chromosome:696247-697291	1044	41.6756	42.3372	188.733	89.4837	263.221	240.051
T303_03845	glucosamine-6-phosphate isomerase	Chromosome:697365-698142	777	10.0304	13.178	16.6944	31.9049	15.0023	45.7913
T303_03850	sensor histidine kinase	Chromosome:698307-700328	2021	6.99014	6.18234	39.0816	16.8548	47.5754	36.732
T303_03855	response regulator	Chromosome:698307-700328	2021	5.34923	3.33029	48.732	11.9804	52.7328	18.8156
T303_03860	molybdopterin biosynthesis protein MoeB	Chromosome:700765-703411	2646	7.60629	6.41715	27.2035	13.9576	39.9135	27.648
T303_03865	ABC transporter ATP-binding protein	Chromosome:700765-703411	2646	8.8793	8.59604	34.7573	17.8672	56.3386	42.8276
T303_03870	ABC transporter permease	Chromosome:700765-703411	2646	7.91842	6.40253	30.4299	14.2548	47.8845	41.6317
T303_03875	sulfurtransferase	Chromosome:703599-704583	984	122.865	164.859	859.743	305.361	770.078	794.419
T303_03880	transcriptional regulator	Chromosome:704761-704959	198	1.73387	2.34731	5.48498	3.48999	12.8438	13.6472
T303_03885	hypothetical protein	Chromosome:704972-705470	498	1.63005	1.19904	2.53792	0.916365	6.95545	6.13503
T303_03890	phosphorylase	Chromosome:705548-706319	771	23.3365	28.9078	199.069	97.1892	331.202	322.311
T303_03895	membrane protein	Chromosome:706409-707096	687	449.426	452.138	804.75	1079.49	1317.42	2420.89
T303_03900	16S pseudouridylate synthase	Chromosome:707175-707895	720	76.6962	136.689	53.1078	140.456	92.6174	110.133
T303_03905	peptidase M20	Chromosome:708130-709276	1146	134.202	231.542	203.348	316.208	327.77	318.63
T303_03910	alanine dehydrogenase	Chromosome:709708-710159	451	0	0	18.3181	0	12.8216	40.8216
T303_03915	alanine dehydrogenase	Chromosome:709708-710159	451	2.52161	2.99841	12.5374	3.483	22.5473	14.0924
T303_03920	pyridine nucleotide-disulfide oxidoreductase	Chromosome:710814-712131	1317	8586.85	22941.9	958.826	25772.1	647.853	18657.6
T303_03925	hypothetical protein	Chromosome:712349-712913	564	46.932	33.076	66.6518	38.0646	54.0676	51.6827
T303_03930	mevalonate kinase	Chromosome:713175-715968	2793	251.892	301.208	69.9957	337.763	108.543	131.856
T303_03935	diphosphomevalonate decarboxylase	Chromosome:713175-715968	2793	226.002	228.093	80.9783	270.372	122.64	140.014
T303_03940	phosphomevalonate kinase	Chromosome:713175-715968	2793	204.908	174.744	90.7116	199.17	148.647	160.657
T303_03945	isopentenyl pyrophosphate isomerase	Chromosome:716017-717025	1008	181.021	115.547	102.418	145.374	174.51	175.668
T303_03950	hypothetical protein	Chromosome:717070-717199	129	99.2566	76.3454	80.9857	105.603	105.036	279.295
T303_03955	N-acetylglucosamine-1-phosphate uridyltransferase	Chromosome:717573-718956	1383	42.1914	46.6189	486.672	108.328	397.365	186.827
T303_03960	ADP-ribose pyrophosphatase	Chromosome:719031-719580	549	57.2378	46.8882	469.335	118.2	392.651	241.474
T303_03965	hypothetical protein	Chromosome:719583-719844	261	39.2849	34.4076	325.09	100.101	277.158	216.762
T303_03970	5'-methylthioadenosine/S-adenosylhomocysteine nucleosidase	Chromosome:719911-720604	693	65.9163	56.7814	460.954	140.774	396.363	310.706
T303_03975	hypothetical protein	Chromosome:721099-721252	153	14.0795	0	26.7228	0	56.7647	13.2288
T303_03980	peptidase	Chromosome:721522-721993	471	2.1165	2.0389	11.2831	4.68462	15.0136	11.8601
T303_03985	hypothetical protein	Chromosome:722060-722414	354	3.26679	3.51005	16.4834	4.99678	23.2853	12.3634
T303_03990	glycosyl transferase family 1	Chromosome:722538-723543	1005	632.279	451.201	574.312	692.34	458.605	319.883
T303_03995	1,2-diacylglycerol 3-glucosyltransferase	Chromosome:723543-724866	1323	435.578	297.035	532.33	437.579	439.915	344.351
T303_04005	threonyl-tRNA synthase	Chromosome:725578-727525	1947	527.033	803.43	478.763	920.014	420.182	804.118
T303_04010	hydrolase	Chromosome:727574-728516	942	229.612	163.498	132.201	78.7012	134.97	58.5196
T303_04015	hypothetical protein	Chromosome:728535-729402	867	213.115	176.106	117.208	95.3569	125.485	65.6955
T303_04020	hypothetical protein	Chromosome:729413-729596	183	400.701	278.25	164.92	138.959	157.364	113.993
T303_04025	hemolysin III-like protein	Chromosome:729906-730584	678	492.922	407.544	218.906	817.026	135.017	424.106
T303_04035	3-hydroxy-3-methylglutaryl-CoA reductase	Chromosome:731196-733660	2464	73.7066	102.399	291.815	172.026	356.47	221.932
T303_04040	hydroxymethylglutaryl-CoA synthase	Chromosome:731196-733660	2464	135.489	181.247	390.541	308.207	435	320.329
T303_04045	thymidylate synthase	Chromosome:733957-734818	861	790.17	914.45	266.962	1416.44	177.317	1281.31
T303_04050	dihydrofolate reductase	Chromosome:734925-735604	679	411.699	830.265	837.774	996.058	1071.52	501.934
T303_04055	hypothetical protein	Chromosome:734925-735604	679	113.669	284.806	217.65	332.627	266.306	209.262
T303_04060	ATP-dependent protease	Chromosome:735621-736848	1227	490.751	903.7	791.47	1405.59	920.526	868.494
T303_04065	ysxC; GTP-binding protein YsxC	Chromosome:736857-737457	600	743.275	1125.47	1160.69	1604.25	1277.74	1148.49
T303_04070	amino acid transporter	Chromosome:737511-739925	2414	18.8492	11.0159	41.0368	14.1158	64.676	23.7855
T303_04075	homocysteine methyltransferase	Chromosome:737511-739925	2414	15.4051	7.7768	53.517	14.9578	90.5883	30.8499
T303_04080	aldose 1-epimerase	Chromosome:740037-740292	255	29.5772	27.7365	182.624	34.5471	351.388	223.516
T303_04085	hypothetical protein	Chromosome:740363-740723	360	40.5006	35.8791	176.123	53.0421	331.092	259.458
T303_04090	glycerol-3-phosphate acyltransferase	Chromosome:740836-741478	642	230.519	82.4011	384.658	237.608	520.676	448.805
T303_04095	DNA topoisomerase IV subunit B	Chromosome:741615-743565	1950	42.237	40.5193	247.12	82.727	236.751	147.1
T303_04100	DNA topoisomerase IV subunit A	Chromosome:744138-746658	2520	64.6271	69.6447	370.185	136.258	399.07	323.681
T303_04105	branched-chain amino acid aminotransferase	Chromosome:746821-747844	1023	46.3218	55.2419	195.47	161.232	306.434	123.41
T303_04110	branched-chain amino acid aminotransferase	Chromosome:747962-748193	231	21.3401	19.0273	316.559	94.4078	346.723	392.43
T303_04115	tRNA-Tyr	Chromosome:748253-748334	81	0	0	0	0	0	0
T303_04120	tRNA-Gln	Chromosome:748402-748477	75	0	0	0	0	0	0
T303_04125	rpsA; 30S ribosomal protein S1	Chromosome:748594-749797	1203	172.499	221.921	4193.21	498.806	4957.5	1146.97
T303_04130	tRNA-Arg	Chromosome:749865-749937	72	0	0	0	0	0	0
T303_04135	hypothetical protein	Chromosome:750624-751245	621	267.75	183.229	516.213	322.006	399.025	93.85
T303_04140	hypothetical protein	Chromosome:751457-753213	1756	116.827	97.7352	166.291	127.935	191.513	77.7193
T303_04145	peptidoglycan branched peptide synthesis protein	Chromosome:751457-753213	1756	211.865	176.559	244.064	293.073	279.942	216.183
T303_04155	ribose 5-phosphate isomerase	Chromosome:754315-754618	303	1243.7	782.409	772.802	884.773	496.136	813.162
T303_04160	NUDIX hydrolase	Chromosome:754627-755086	459	929.335	460.097	454.516	385.401	313.026	423.463
T303_04165	ATP-dependent Clp protease ATP-binding protein	Chromosome:755228-757487	2259	0	0	1081.79	0	793.463	0
T303_04170	ornithine carbamoyltransferase	Chromosome:757664-758708	1044	6.84513	6.87709	14.2702	11.2575	37.889	11.8369
T303_04175	hypothetical protein	Chromosome:758776-759007	231	284.491	278.545	759.49	416.046	619.436	704.187
T303_04180	glutamine ABC transporter permease	Chromosome:759274-760692	1418	133.085	108.874	176.231	110.236	346.966	82.8534
T303_04185	peptide ABC transporter ATP-binding protein	Chromosome:759274-760692	1418	246.013	294.4	198.681	247.782	404.177	157.598
T303_04190	iron transporter FeoA	Chromosome:760865-763477	2612	418.463	316.83	164.481	373.116	235.771	221.314
T303_04195	ferrous iron transporter B	Chromosome:760865-763477	2612	454.206	368.383	164.559	407.939	221.575	243.331
T303_04200	membrane protein	Chromosome:763488-763629	141	961.202	580.984	399.761	1019.67	442.659	351.429
T303_04205	dTDP-4-dehydrorhamnose 3,5-epimerase	Chromosome:763740-764316	576	431.003	449.453	403.024	587.936	513.118	533.31
T303_04210	transcriptional regulator	Chromosome:764790-765087	297	22.5613	13.6043	71.9807	37.7988	77.5964	88.0908
T303_04215	lysophospholipase	Chromosome:765261-765486	225	55.9452	46.5402	76.6781	63.929	104.431	200.277
T303_04220	hypothetical protein	Chromosome:765616-765709	93	0	0	0	0	0	0
T303_04225	hypothetical protein	Chromosome:765733-765925	192	83.5136	85.868	166.703	135.847	287.326	443.454
T303_04230	tetrahydrofolate dehydrogenase	Chromosome:766098-766953	855	32.7549	21.9771	48.4476	60.874	90.1748	83.8594
T303_04235	carbohydrate kinase	Chromosome:766956-767793	837	30.9699	16.7698	69.0066	41.4652	125.354	71.8606
T303_04240	penicillin-binding protein 2B	Chromosome:767914-770029	2115	183.362	111.208	262.272	167.033	249.563	136.883
T303_04245	recombinase RecR	Chromosome:770138-770735	597	40.6642	22.807	383.553	80.457	355.036	423.481
T303_04255	metalloprotease	Chromosome:771891-772774	883	351.156	351.716	603.121	557.931	435.478	513.115
T303_04260	diacylglycerol kinase	Chromosome:771891-772774	883	241.614	238.701	330.188	371.517	206.035	495.468
T303_04265	era; GTP-binding protein	Chromosome:772792-773692	900	376.653	395.24	601.316	591.018	403.128	1087.81
T303_04270	formamidopyrimidine-DNA glycosylase	Chromosome:773738-775150	1412	162.259	167.516	192.328	162.836	138.43	73.005
T303_04275	dephospho-CoA kinase	Chromosome:773738-775150	1412	169.01	167.131	199.362	153.489	149.908	83.8924
T303_04285	50S ribosomal protein L33	Chromosome:776414-776561	147	244.039	323.522	349.2	182.715	242.549	295.668
T303_04290	preprotein translocase subunit SecG	Chromosome:776605-776842	237	464.611	331.516	1370.74	500.17	1126.92	790.882
T303_04295	ribonuclease R	Chromosome:776900-779354	2454	260.566	166.48	410.166	170.778	438.96	239.229
T303_04300	single-stranded DNA-binding protein	Chromosome:779375-779840	465	254.847	107.385	441.832	154.521	501.732	314.671
T303_04305	peptidyl-prolyl cis-trans isomerase	Chromosome:779993-781400	1407	340.107	330.339	690.143	462.619	746.219	595.984
T303_04310	hypothetical protein	Chromosome:781401-781767	366	627.644	341.734	1571.79	631.898	1737.52	1252.7
T303_04315	dipeptidase	Chromosome:781869-782955	1086	1289.49	2615.18	422.21	3372.27	470.414	2689.97
T303_04320	catabolite control protein A	Chromosome:783235-784270	1035	2396.33	5126.9	765.722	6306.44	432.137	5887.07
T303_04325	MmcQ protein	Chromosome:784328-784526	198	1354.76	1435.91	136.927	1420.65	126.893	518.803
T303_04335	glycerate kinase	Chromosome:785408-786524	1116	1032.33	912.96	97.5919	946.455	87.1074	301.561
T303_04340	glycogen synthase	Chromosome:786570-787026	456	1581.79	1359.48	146.385	1684.09	133.293	873.79
T303_04345	enolase	Chromosome:787234-788539	1305	0	0	9928.4	0	6950.31	0
T303_04350	isoleucyl-tRNA synthetase	Chromosome:788690-788876	186	747.252	1092.52	962.22	1957.13	1149.43	2075.21
T303_04355	alkaline phosphatase	Chromosome:789037-791224	2187	74.7256	92.4831	346.471	157.386	362.336	148.35
T303_04360	SAM-dependent methyltransferase	Chromosome:791385-794070	2685	718.508	637.48	176.194	975.934	176.058	227.941
T303_04365	aroD; 3-dehydroquinate dehydratase	Chromosome:791385-794070	2685	1028.44	1335.2	219.967	1757.13	221.286	542.043
T303_04370	shikimate 5-dehydrogenase	Chromosome:791385-794070	2685	936.777	1247.53	198.964	1564.72	193.904	580.432
T303_04375	3-dehydroquinate synthase	Chromosome:794082-795150	1068	1073.75	1234.15	222.245	1858.01	221.382	993.653
T303_04380	chorismate synthase	Chromosome:795150-796317	1167	1159.58	1384.35	274.528	1942.2	276.053	1065.7
T303_04385	prephenate dehydrogenase	Chromosome:796346-797453	1107	1068.76	1332.2	300.992	1705.93	310.142	1032.3
T303_04390	hypothetical protein	Chromosome:797462-797801	339	970.206	1514.43	274.518	1899.37	270.108	1117.55
T303_04395	L-2-hydroxyisocaproate dehydrogenase	Chromosome:797856-798804	948	968.687	1324.39	226.365	1830.48	233.418	501.713
T303_04400	3-phosphoshikimate 1-carboxyvinyltransferase	Chromosome:798887-801470	2583	1258.05	1044.06	339.202	1476.27	364.054	419.779
T303_04405	shikimate kinase	Chromosome:798887-801470	2583	1102.05	842.935	291.812	1143.6	324.785	365.766
T303_04410	prephenate dehydratase	Chromosome:798887-801470	2583	1452.96	1216.12	360.827	1545.43	394.256	473.819
T303_04415	LytR family transcriptional regulator	Chromosome:801481-802912	1431	1885.65	1752.98	488.896	2010.66	547.911	582.662
T303_04420	ethanolamine utilization protein EutJ	Chromosome:802927-803866	939	21.1644	37.1946	32.9326	38.5081	134.621	88.4874
T303_04425	dehydrogenase	Chromosome:803882-804947	1065	41.3472	66.6233	226.123	116.085	1011.66	223.854
T303_04430	alkylhydroperoxidase	Chromosome:804986-805535	549	29.3736	43.6774	237.685	87.6494	1040.38	190.542
T303_04435	RNA methyltransferase	Chromosome:805750-807121	1371	257.379	357.631	136.219	328.252	140.817	168.549
T303_04450	hypothetical protein	Chromosome:808391-808958	567	186.802	203.36	122.059	181.662	142.971	172.416
T303_04455	hypothetical protein	Chromosome:809137-809320	183	135.897	160.507	74.656	143.58	91.6037	115.2
T303_04470	transposase	Chromosome:811594-811855	261	32.7121	30.2159	13.0372	30.3991	25.886	46.9838
T303_04480	bacteriocin immunity protein	Chromosome:812879-813077	198	1308.58	8366.81	104.385	5469.02	75.6302	14339.5
T303_04495	pyrimidine dimer DNA glycosylase	Chromosome:813772-814524	752	271.135	158.64	87.1399	226.191	127.026	291.796
T303_04505	hypothetical protein	Chromosome:815065-815281	216	345.177	197.337	107.897	229.496	159.659	415.473
T303_04515	hypothetical protein	Chromosome:816024-816392	368	326.585	481.676	50.9319	456.112	81.048	1334.42
T303_04520	hypothetical protein	Chromosome:816024-816392	368	590.024	725.602	117.588	517.856	156.185	2296.49
T303_04525	hypothetical protein	Chromosome:816487-817099	612	465.513	507.873	341.598	389.205	322.613	2104.62
T303_04530	CRISPR-associated protein Csn1	Chromosome:817354-820720	3366	263.944	326.277	237.581	520.895	156.777	549.139
T303_04535	CRISPR-associated protein Cas1	Chromosome:820896-821808	912	95.6764	177.383	32.7369	154.8	24.6992	35.9487
T303_04540	CRISPR-associated protein Cas2	Chromosome:821809-823182	1373	65.6154	70.3066	29.6633	73.8827	24.0579	27.8832
T303_04545	CRISPR-associated protein Csn2	Chromosome:821809-823182	1373	80.5961	64.5678	31.599	73.0497	23.7792	32.3313
T303_04550	phosphate ABC transporter substrate-binding protein	Chromosome:825433-827151	1718	624.726	508.988	415.412	576.129	223.57	422.771
T303_04555	membrane protein	Chromosome:825433-827151	1718	491.078	413.717	337.369	486.89	186.96	441.465
T303_04560	hypothetical protein	Chromosome:827156-827288	132	717.281	260.79	420.803	617.786	156.707	856.669
T303_04565	S1 RNA-binding protein	Chromosome:827514-830074	2560	445.231	301.708	375.843	358.333	375.243	243.935
T303_04570	sprT-like protein	Chromosome:827514-830074	2560	836.338	543.983	608.256	630.948	605.011	492.6
T303_04575	membrane protein	Chromosome:830139-830403	264	5148.12	13150.9	1047.81	11774.3	1861.96	5790.05
T303_04580	HPr kinase/phosphorylase	Chromosome:830532-832253	1721	1101.04	1566.33	328.923	1626.55	233.725	790.28
T303_04585	prolipoprotein diacylglyceryl transferase	Chromosome:830532-832253	1721	965.299	1180.62	349.074	1166.8	246.368	624.366
T303_04590	chemotaxis protein	Chromosome:832282-832774	492	835.164	985.929	571.369	1115.8	434.656	900.43
T303_04595	hypothetical protein	Chromosome:832786-833227	441	2326.38	2287.73	912.147	3595.88	725.153	1415.26
T303_04600	hypothetical protein	Chromosome:833247-833544	297	418.224	295.863	350.801	302.817	511.309	485.205
T303_04605	peptidase family U32	Chromosome:833772-834702	930	1393.9	1186.48	612.672	1069.06	692.416	559.588
T303_04610	protease	Chromosome:834780-836085	1305	1396.36	1352.15	595.418	1143.98	706.131	657.929
T303_04615	transposase IS1193	Chromosome:836485-837742	1257	0	0	0	0	0	0
T303_04625	hypothetical protein	Chromosome:838509-838800	291	115.071	38.7457	124.525	88.4358	164.034	201.398
T303_04630	seryl-tRNA synthetase	Chromosome:838919-839132	213	773.596	776.762	205.007	1135.98	156.326	1562.15
T303_04635	transposase IS1193	Chromosome:839219-840548	1329	0	0	0	0	0	0
T303_04640	manganese transporter	Chromosome:840591-841926	1335	3468.62	4735.21	1246.88	6379.19	1562.25	3492.45
T303_04645	hypothetical protein	Chromosome:842120-842429	309	0.753908	0.230413	1.23924	1.42707	2.52993	3.18054
T303_04650	DNA mismatch repair protein MutT	Chromosome:842447-842921	474	90.0943	135.477	103.531	128.48	128.883	228.035
T303_04655	RNA helicase	Chromosome:842943-845829	2886	5.83663	2.48321	5.25571	3.95697	9.20425	11.3354
T303_04660	transposase IS905	Chromosome:845927-847103	1176	0.190097	0.118575	0	0	0	0.0283811
T303_04665	lysS; lysyl-tRNA synthetase	Chromosome:847786-849322	1536	245.304	299.493	850.083	501.719	944.265	550.695
T303_04670	peptidoglycan-binding protein	Chromosome:849504-851275	1771	306.14	290.982	477.857	412.68	213.288	584.662
T303_04675	Valyl-tRNA synthetase	Chromosome:849504-851275	1771	401.168	255.358	520.56	384.471	262.636	761.92
T303_04680	HAD family hydrolase	Chromosome:851598-852501	903	162.837	145.671	379.5	271.078	358.795	191.889
T303_04685	hypothetical protein	Chromosome:852697-852892	195	25.7337	6.9746	13.1451	25.6804	19.4568	11.9206
T303_04690	phosphoglycerate mutase	Chromosome:852924-853563	639	1054.84	2259.51	127.215	1717.75	170.337	205.788
T303_04695	prolyl-tRNA synthetase	Chromosome:853565-854039	474	828.355	1684.46	92.5936	1300.04	119.152	133.433
T303_04700	N-acetylmuramoyl-L-alanine amidase	Chromosome:854153-855101	948	2640.25	3391.14	543.843	3481.41	889.117	2690.43
T303_04705	sodium transporter	Chromosome:855292-855682	390	1756.91	1170.48	185.134	1761.16	334.039	710.088
T303_04710	membrane protein	Chromosome:855937-856564	627	27.2814	31.6841	92.6429	73.2806	173.652	175.051
T303_04715	hypothetical protein	Chromosome:856675-856777	102	4868.14	3025.75	1520.14	5304.53	1652.54	3670.4
T303_04720	hypothetical protein	Chromosome:856810-857092	282	233.92	333.108	60.2228	458.622	76.4767	353.921
T303_04725	lipase	Chromosome:857374-857578	204	166.171	299.997	45.6038	370.477	66.3538	341.161
T303_04735	hypothetical protein	Chromosome:858645-858783	138	228.594	278.095	86.8799	395.352	94.4809	132.426
T303_04740	type I restriction-modification system restriction subunit	Chromosome:858892-861883	2991	186.937	170.302	95.9087	254.256	92.1184	107.291
T303_04745	hypothetical protein	Chromosome:861888-863016	1128	57.7013	34.1953	56.9835	55.0147	57.4593	30.0453
T303_04750	hypothetical protein	Chromosome:863057-863309	252	31.7648	34.6827	42.7669	47.1805	48.4835	18.4286
T303_04755	hypothetical protein	Chromosome:863605-863791	186	21.7267	10.404	31.4862	9.42389	47.6671	14.372
T303_04760	hypothetical protein	Chromosome:863814-864342	528	16.7799	12.8415	37.8836	17.7486	44.4093	24.0783
T303_04765	type I restriction-modification system specificty subunit	Chromosome:864375-865584	1209	58.98	68.1221	86.9731	113.04	84.2018	116.729
T303_04770	NTPase	Chromosome:865598-867467	1869	28.8918	31.8401	65.9731	52.1188	70.9421	60.8468
T303_04775	hypothetical protein	Chromosome:867501-868254	753	47.7359	44.3616	104.869	82.374	101.56	89.0194
T303_04780	type I restriction-modification system methyltransferase subunit	Chromosome:868296-869901	1605	36.1502	24.1127	132.163	46.0951	132.75	46.721
T303_04795	cytoplasmic membrane protein	Chromosome:871647-872208	561	2062.52	1712.99	951.843	3107.7	657.78	1482.98
T303_04800	heat shock protein HtpX	Chromosome:872209-873109	900	1658.2	598.607	880.289	948.646	617.089	874.46
T303_04805	membrane protein	Chromosome:873226-874092	866	424.71	240.493	289.34	471.65	401.833	543.217
T303_04810	hypothetical protein	Chromosome:873226-874092	866	400.586	103.48	293.545	251.209	444.648	586.751
T303_04815	phosphoenolpyruvate carboxylase	Chromosome:874267-877090	2823	515.567	420.773	701.536	828.584	871.613	651.638
T303_04820	DNA polymerase III subunit delta	Chromosome:877157-878192	1035	178.183	60.6705	211.451	125.417	199.635	170.781
T303_04825	superoxide dismutase	Chromosome:878229-878892	663	6892.78	7648.69	3194.25	13146.9	1968.57	7903.06
T303_04830	Peptidase family S11	Chromosome:878988-880368	1380	454.248	253.139	117.017	303.884	231.131	281.407
T303_04835	DNA protection during starvation protein	Chromosome:881164-881686	522	11117.7	11206.5	4678.86	15017.4	1688.51	6060.57
T303_04840	Fur family transcriptional regulator	Chromosome:881774-882212	438	11219.3	6086.82	5593.18	8855.83	2268.99	5675.87
T303_04845	hypothetical protein	Chromosome:882322-883490	1168	15799.7	11075.8	4442.61	13638.6	3988.43	8810.56
T303_04850	glucokinase	Chromosome:882322-883490	1168	8438.55	5809.17	2148.24	6501.38	1865.2	4451.11
T303_04855	GTP-binding protein	Chromosome:883627-885478	1851	2535	2842.26	1223.46	2456.46	1465.95	1106.25
T303_04860	membrane protein	Chromosome:885497-885770	273	3902.74	4083.05	1935.52	3723.43	2487.08	1776.19
T303_04865	murD; UDP-N-acetylmuramoyl-L-alanyl-D-glutamate synthetase	Chromosome:885893-887246	1353	139.292	83.6369	225.983	123.839	191.037	120.602
T303_04870	UDP diphospho-muramoylpentapeptide beta-N-acetylglucosaminyltransferase	Chromosome:887249-888320	1071	156.976	66.9854	305.232	128.022	288.365	177.598
T303_04880	cell division protein FtsA	Chromosome:889576-890953	1377	776.228	865.323	925.499	1021.22	874.265	536.118
T303_04885	cell division protein FtsZ	Chromosome:890981-892304	1323	1201.46	1009.29	1302.04	1347.06	1192.32	964.512
T303_04890	cell division protein	Chromosome:892306-892990	684	1037.27	669.173	1101.27	980.924	1075.8	895.729
T303_04895	cell division protein SepF	Chromosome:892994-893564	570	1043.95	689.28	1098.49	1046.44	1070.94	1069.56
T303_04900	membrane protein	Chromosome:893567-894625	1058	647.476	446.231	619.735	683.424	544.465	762.444
T303_04905	RNA binding protein	Chromosome:893567-894625	1058	855.452	542.831	1044.73	843.74	1046.02	1075.38
T303_04910	cell division protein DivIVA	Chromosome:894868-895744	876	1073.77	757.549	1222.03	1310.13	1192.94	1730.67
T303_04915	ileS; isoleucyl-tRNA synthetase	Chromosome:895991-898781	2790	739.73	1218.71	503.053	1260.9	386.945	616.912
T303_04925	manganese transporter NRAMP family	Chromosome:899996-901259	1263	9.9658	11.0938	28.9484	31.3339	112.086	62.4797
T303_04930	rpmE2; 50S ribosomal protein L31	Chromosome:901381-901624	243	2735.29	1750.33	5910.79	3141.73	7629.29	4546.55
T303_04935	thiamine biosynthesis protein ApbE	Chromosome:901729-903593	1864	257.8	110.653	218.715	146.316	248.668	389.815
T303_04940	oligoribonuclease	Chromosome:901729-903593	1864	214.465	92.9629	207.825	140.566	219.296	277.095
T303_04945	glutathione S-transferase	Chromosome:903673-904492	819	292.816	111.98	646.902	249.634	709.631	579.965
T303_04950	adenosine deaminase	Chromosome:904631-905642	1011	58.3293	85.5387	28.0826	106.008	39.3702	125.282
T303_04955	thymidine kinase	Chromosome:905870-906467	597	44.68	47.8491	160.839	81.8341	234.878	154.504
T303_04960	peptide chain release factor 1	Chromosome:906503-909005	2502	60.286	71.4695	232.632	115.726	319.255	204.896
T303_04965	N5-glutamine S-adenosyl-L-methionine-dependent methyltransferase	Chromosome:906503-909005	2502	61.8841	82.8924	270.294	131.75	355.914	231.883
T303_04970	tRNA threonylcarbamoyl adenosine modification protein	Chromosome:906503-909005	2502	85.9948	66.4055	368.463	147.812	501.601	278.586
T303_04975	glyA; serine hydroxymethyltransferase	Chromosome:909099-910350	1251	76.568	62.3647	353.372	141.448	454.661	263.683
T303_04980	hypothetical protein	Chromosome:910356-911334	978	44.3824	29.1582	213.014	73.44	287.149	138.188
T303_04985	hypothetical protein	Chromosome:911335-911947	612	58.5616	32.2303	317.905	92.5955	446.674	215.241
T303_04990	multidrug ABC transporter ATP-binding protein	Chromosome:911979-915457	3478	19.5715	11.819	104.341	34.5152	139.37	50.8434
T303_04995	sugar ABC transporter ATP-binding protein	Chromosome:911979-915457	3478	15.7038	8.76592	103.119	29.1172	137.029	65.0881
T303_05000	putative component involved in D-alanylation of teichoic acids	Chromosome:915498-915765	267	5.2217	2.1795	44.4982	4.25389	44.3384	3.89565
T303_05005	D-alanine--poly(phosphoribitol) ligase	Chromosome:915773-918568	2795	287.041	244.845	849.723	505.159	720.171	344.593
T303_05010	D-alanyl-lipoteichoic acid biosynthesis protein DltB	Chromosome:915773-918568	2795	286.109	226.896	872.46	454.986	775.257	407.696
T303_05015	D-alanine--poly(phosphoribitol) ligase	Chromosome:918585-920086	1501	367.528	341.904	1255.15	685.863	1217.9	597.917
T303_05020	D-alanyl-lipoteichoic acid biosynthesis protein DltD	Chromosome:918585-920086	1501	293.641	259.098	958.394	497.834	923.524	555.653
T303_05030	transposase IS861	Chromosome:920640-920976	336	95.3335	122.365	123.378	151.404	93.3173	277.486
T303_05040	Ca2+, Mn2+-P-type ATPase	Chromosome:921686-924323	2637	330.647	289.298	406.609	358.27	361.39	248.914
T303_05045	anthranilate synthase	Chromosome:924499-926218	1719	293.506	287.239	108.047	348.142	156.019	85.9817
T303_05050	hypothetical protein	Chromosome:926637-926799	162	0	0	2.38647	15.3731	1.16217	10.7586
T303_05055	hypothetical protein	Chromosome:926815-927004	189	1.06675	0	0	2.41771	2.27319	0
T303_05060	hypothetical protein	Chromosome:927282-927558	276	16.3057	26.9779	14.7817	30.3438	20.2959	56.3867
T303_05065	hypothetical protein	Chromosome:927574-927760	186	4.72715	3.69187	3.88639	4.05579	2.3339	5.55528
T303_05070	hypothetical protein	Chromosome:927778-927889	111	0	131.318	0	0	0	0
T303_05075	DNA primase	Chromosome:928057-930413	2356	6.43295	6.40569	5.4282	8.03309	6.29586	17.5558
T303_05080	hypothetical protein	Chromosome:928057-930413	2356	6.57297	8.24138	5.46741	9.69469	6.14761	13.9325
T303_05085	hypothetical protein	Chromosome:930427-930700	273	6.37099	7.72082	2.65444	6.7642	3.77589	7.95287
T303_05090	hypothetical protein	Chromosome:930836-931179	343	19.6138	0	0	0	0	0
T303_05095	hypothetical protein	Chromosome:930836-931179	343	4.72211	13.208	7.96414	5.64129	6.92991	9.09376
T303_05100	hypothetical protein	Chromosome:931192-931387	195	4.39573	6.46222	8.14062	1.36063	2.49832	3.72346
T303_05105	hypothetical protein	Chromosome:931390-931684	294	5.04487	11.0421	5.163	11.919	5.39684	8.08725
T303_05110	XRE family transcriptional regulator	Chromosome:931922-932120	198	8.28857	2.80849	3.75496	2.55489	3.82345	4.47515
T303_05115	XRE family transcriptional regulator	Chromosome:932282-932795	513	46.8228	17.4021	69.8621	29.0607	89.9562	65.0354
T303_05120	DNA integrase	Chromosome:932877-934044	1167	47.8158	25.0825	79.883	39.5455	112.109	102.783
T303_05125	hypothetical protein	Chromosome:934159-934495	336	34.1853	14.4549	79.7187	22.4315	129.571	143.465
T303_05130	5-methyltetrahydropteroyltriglutamate--homocysteine methyltransferase	Chromosome:934784-937073	2289	25.2868	23.3394	21.0359	54.4697	39.7954	48.4904
T303_05135	5,10-methylenetetrahydrofolate reductase	Chromosome:937201-938137	936	34.4469	25.4194	26.3828	65.0647	53.3287	81.67
T303_05140	phosphoglucomutase	Chromosome:938276-939995	1719	1651.51	1937.68	1251.46	2061.84	1070.44	3205.07
T303_05145	membrane protein	Chromosome:940077-940650	573	384.275	322.92	282.05	517.938	350.195	415.36
T303_05150	phosphopantothenoylcysteine decarboxylase	Chromosome:940677-941899	1222	290.474	221.676	271.034	344.582	320.227	294.97
T303_05155	phosphopantothenate--cysteine ligase	Chromosome:940677-941899	1222	261.614	160.156	342.993	285.862	375.733	242.397
T303_05160	formate--tetrahydrofolate ligase	Chromosome:942092-943763	1671	973.881	1783.13	454.571	1338.73	261.254	294.688
T303_05175	transposase IS3	Chromosome:946078-946819	741	23.8574	38.7189	6.27476	37.0546	8.48884	24.6499
T303_05180	transposase IS3	Chromosome:946833-947703	870	0	0	0	0	0	0
T303_05185	transposase IS1193	Chromosome:947893-949105	1212	10.7983	12.8623	69.2196	20.1505	160.126	43.1304
T303_05190	spermidine/putrescine ABC transporter permease	Chromosome:949227-950534	1307	7.30051	7.27693	10.8805	6.46378	13.819	17.329
T303_05195	spermidine/putrescine ABC transporter substrate-binding protein	Chromosome:949227-950534	1307	2.91648	2.82368	6.55065	5.94297	10.7551	14.8302
T303_05200	ribonuclease HII	Chromosome:950651-952190	1539	1.82809	1.8832	1.29805	2.15462	2.72296	5.17358
T303_05205	cell envelope serine proteinase	Chromosome:953014-957871	4857	80.7725	112.522	142.269	275.227	181.194	206.564
T303_05215	transposase IS3	Chromosome:958698-959568	870	22.3507	23.3384	12.7465	30.753	14.0489	26.9681
T303_05220	transposase IS1193	Chromosome:959668-960997	1329	0	0	0	0	0	0
T303_05225	30S ribosomal protein S20	Chromosome:961096-961348	252	2201.98	879.842	4548.7	1374.66	4618.32	1020.57
T303_05230	pantothenate kinase	Chromosome:961401-962322	921	33.2046	16.7524	120.206	46.3473	100.737	48.3249
T303_05235	16S rRNA methyltransferase	Chromosome:962593-963235	642	709.104	911.696	418.655	1105.86	417.438	831.449
T303_05250	cytidine deaminase	Chromosome:965186-965585	399	826.362	1539.14	290.845	1300.84	316.529	1551.2
T303_05255	membrane protein	Chromosome:965590-966718	1128	1151.19	1763.29	906.374	1938.56	912.724	3279.12
T303_05260	heme ABC transporter ATP-binding protein	Chromosome:966816-969430	2614	823.763	747.454	496.883	1040.03	471.569	1439.02
T303_05265	branched-chain amino acid ABC transporter permease	Chromosome:966816-969430	2614	721.145	497.024	511.346	757.932	496.4	1608.27
T303_05270	sugar ABC transporter permease	Chromosome:969431-970388	957	747.139	360.199	561.826	591.951	545.016	1563.42
T303_05275	hypothetical protein	Chromosome:970491-971127	636	143.105	233.45	92.682	303.438	209.436	147.733
T303_05280	helicase DinG	Chromosome:971221-973708	2487	80.0057	58.1617	296.482	95.8932	214.241	132.492
T303_05285	hypothetical protein	Chromosome:973852-974335	483	167.592	129.007	556.322	238.971	609.897	516.901
T303_05290	aspartate aminotransferase	Chromosome:974339-975521	1182	200.688	171.547	529.077	325.894	581.901	645.586
T303_05295	asnC; asparaginyl-tRNA synthase	Chromosome:975557-976904	1347	357.284	377.457	794.676	645.877	852.851	1337.41
T303_05310	translation initiation inhibitor	Chromosome:978419-978800	381	24.9754	15.1754	115.953	72.5615	163.383	53.2722
T303_05315	7-cyano-7-deazaguanine synthase	Chromosome:978974-980780	1806	11.4519	14.4651	59.4796	23.4253	143.02	88.9155
T303_05320	6-pyruvoyl tetrahydrobiopterin synthase	Chromosome:978974-980780	1806	11.4513	8.44603	65.4306	19.097	185.029	123.369
T303_05325	7-carboxy-7-deazaguanine synthase	Chromosome:978974-980780	1806	9.33881	8.42673	69.1505	19.2754	197.559	175.435
T303_05330	7-cyano-7-deazaguanine reductase	Chromosome:980854-981391	537	10.8523	8.37665	76.742	25.5592	233.703	174.024
T303_05335	hypothetical protein	Chromosome:981602-981776	174	5.03124	2.2394	1.603	2.74575	1.72408	0
T303_05340	serine protease	Chromosome:982211-982400	189	13.9477	35.8948	2.15431	25.3797	5.76889	10.6407
T303_05345	cyclic nucleotide-binding protein	Chromosome:982604-986125	3521	614.098	963.836	343.414	1119.7	235.93	659.285
T303_05350	ATPase P	Chromosome:982604-986125	3521	496.428	640.769	312.215	753.913	224.026	385.115
T303_05355	hypothetical protein	Chromosome:982604-986125	3521	407.838	470.906	322.739	521.692	243.675	315.207
T303_05360	sporulation protein	Chromosome:982604-986125	3521	288.06	285.075	298.89	322.104	237.955	220.924
T303_05370	bacteriocin	Chromosome:987221-987347	126	321.025	300.926	600.694	275.997	728.605	375.144
T303_05375	cold-shock protein	Chromosome:987426-987636	210	167.793	102.717	988.164	191.956	1058.68	407.862
T303_05380	cold-shock protein	Chromosome:987915-988116	201	123.549	181.165	762.092	263.291	1113.04	920.993
T303_05385	transposase IS3	Chromosome:988374-989244	870	0	0	0.0901308	0	0.0173809	0.0979362
T303_05390	transposase IS3	Chromosome:989258-989999	741	0.908861	0	0	0	0.0240729	0
T303_05395	transposase IS905	Chromosome:990139-991315	1176	172.242	140.009	16.9348	110.702	17.7609	71.8644
T303_05400	hypothetical protein	Chromosome:991505-991685	180	23.0233	47.7363	0	36.6942	0.792358	0
T303_05405	ATPase	Chromosome:991878-993969	2091	4232.21	4457.28	162.272	4983.28	130.748	384.467
T303_05410	transposase IS905	Chromosome:994110-994989	879	0.189391	0	0	0	0.0191217	0
T303_05415	type I restriction-modification system restriction subunit	Chromosome:995183-996200	1017	12.339	6.19398	4.2956	10.5623	7.86053	10.9024
T303_05420	cysteine synthase	Chromosome:996944-997856	912	96.1688	194.576	133.033	385.674	170.923	155.345
T303_05425	cystathionine beta-lyase	Chromosome:997877-999062	1185	130.717	259.826	109.731	417.297	162.573	193.983
T303_05435	hypothetical protein	Chromosome:1000112-1000340	228	356.332	347.941	57.3155	413.855	53.7466	256.055
T303_05450	DNA methyltransferase	Chromosome:1002084-1002717	633	1.56995	1.01988	0.554776	1.48662	2.93024	5.66761
T303_05455	glucose/ribose uptake permease	Chromosome:1003195-1004083	888	114.239	101.512	317.671	174.571	242.116	185.968
T303_05460	hypothetical protein	Chromosome:1004698-1004893	195	20.4859	5.82904	15.1711	8.02237	17.2383	19.8464
T303_05465	restriction endonuclease subunit M	Chromosome:1004961-1005405	444	46.1125	10.6384	19.7279	20.1213	30.1052	36.8936
T303_05470	hypothetical protein	Chromosome:1005713-1006406	693	10.8846	8.49342	6.48491	10.5078	10.2672	7.73519
T303_05475	zinc ABC transporter substrate-binding protein	Chromosome:1006562-1008107	1545	16.5307	7.61045	48.888	14.7725	118.389	38.4543
T303_05480	hypothetical protein	Chromosome:1008321-1008720	399	64.1451	26.4752	173.112	54.1219	189.15	89.7895
T303_05485	hypothetical protein	Chromosome:1008880-1009180	300	103.212	24.801	47.0155	17.6306	38.3529	33.983
T303_05490	membrane protein	Chromosome:1009234-1010242	1008	85.8187	98.7511	156.859	160.786	271.386	246.733
T303_05495	peptidoglycan hydrolase	Chromosome:1010414-1011128	714	31.2909	22.2392	31.2434	34.7308	72.8003	74.1241
T303_05510	LysR family transcriptional regulator	Chromosome:1012104-1013013	909	363.999	230.008	414.468	275.042	268.198	105.738
T303_05515	glucosamine-fructose-6-phosphate aminotransferase	Chromosome:1013219-1015028	1809	743.605	664.125	560.686	928.387	1174.31	1639.4
T303_05520	hypothetical protein	Chromosome:1015144-1015474	330	829.26	816.53	682.188	1003.97	1723.9	2496.87
T303_05525	amino acid ABC transporter permease	Chromosome:1015667-1016309	642	121.436	107.928	157.731	146.161	433.583	434.548
T303_05530	amino acid ABC transporter ATPase	Chromosome:1016317-1016947	630	189.33	197.326	212.488	273.095	600.977	775.351
T303_05555	alcohol dehydrogenase	Chromosome:1019859-1020219	360	21.8993	35.9372	22.0366	93.2949	82.832	197.513
T303_05565	hypothetical protein	Chromosome:1021180-1021303	123	261.21	131.217	128.479	664.748	264.393	420.316
T303_05575	GMP synthase	Chromosome:1022126-1023710	1584	4490.29	9475.07	1248.71	7486.92	1226.41	4769
T303_05580	GntR family transcriptional regulator	Chromosome:1023856-1024555	699	67.3478	66.8319	128.917	110.004	152.719	193.544
T303_05585	DNA-binding protein	Chromosome:1024621-1024954	333	95.9721	76.6522	539.877	157.642	628.374	360.728
T303_05590	signal recognition particle protein Srp54	Chromosome:1024986-1026549	1563	123.164	145.069	514.7	260.465	629.884	622
T303_05595	membrane protein	Chromosome:1026591-1027179	588	29.2949	43.9575	40.9706	49.7035	130.245	158.071
T303_05600	DeoR family transcriptional regulator	Chromosome:1027202-1027718	516	61.8659	111.624	105.803	126.21	306.31	512.264
T303_05605	DNA-binding protein	Chromosome:1027812-1028502	690	126.175	74.3165	135.139	154.908	299.468	481.773
T303_05610	rbgA; ribosome biogenesis GTPase A	Chromosome:1028629-1030238	1609	1164.56	1811.7	233.238	1973.19	237.172	301.172
T303_05615	ribonuclease HII	Chromosome:1028629-1030238	1609	954.103	1133.25	216.609	1179.34	237.927	279.415
T303_05620	transcriptional regulator	Chromosome:1030248-1031169	921	796.095	760.886	218.389	775.728	238.727	286.073
T303_05625	DNA polymerase sliding clamp subunit	Chromosome:1031236-1032076	840	25.9075	48.6625	2.30656	47.8665	7.49871	11.3535
T303_05630	DNA topoisomerase I	Chromosome:1032243-1034388	2145	193.11	382.544	254.224	275.381	533.619	854.946
T303_05635	membrane protein	Chromosome:1034504-1035329	825	2.82198	3.7051	2.46889	3.54547	3.56943	5.47446
T303_05640	multidrug ABC transporter	Chromosome:1035364-1037409	2045	13.2441	10.6611	20.6048	13.1195	29.8633	19.8571
T303_05645	sensor histidine kinase	Chromosome:1035364-1037409	2045	8.34989	4.72129	13.3212	5.9604	21.6979	17.0071
T303_05650	gid; tRNA (uracil-5-)-methyltransferase	Chromosome:1037509-1038853	1344	84.2915	88.4731	380.323	145.064	383.075	451.361
T303_05655	5-methyltetrahydropteroyltriglutamate--homocysteine S-methyltransferase	Chromosome:1039116-1039908	792	20.2937	13.7689	13.679	13.1739	36.6721	59.2411
T303_05660	nucleoside diphosphate kinase	Chromosome:1040218-1040647	429	202.281	184.833	460.86	250.206	408.235	276.479
T303_05665	sulfurtransferase	Chromosome:1040648-1040942	294	309.302	161.234	849.819	274.81	751.591	481.691
T303_05675	hypothetical protein	Chromosome:1042016-1042181	165	151.365	73.4103	654.768	135.03	720.683	294.875
T303_05680	GTP-binding protein LepA	Chromosome:1042302-1044135	1833	339.339	256.244	526.726	338.509	581.741	638.994
T303_05685	MutR family transcriptional regulator	Chromosome:1044657-1045515	858	31.5182	25.1333	46.6262	34.9501	46.1348	26.0649
T303_05695	transposase IS905	Chromosome:1046367-1047543	1176	0.278877	0	0.0101723	0	0.0132546	0
T303_05700	hypothetical protein	Chromosome:1047740-1047905	165	62.1169	71.996	36.8807	90.1144	31.8204	46.1447
T303_05705	radical SAM protein	Chromosome:1047987-1049205	1218	9.61614	7.17182	13.5165	10.9027	17.4292	11.1541
T303_05715	permease of the major facilitator superfamily MFS	Chromosome:1049950-1051123	1173	3.04938	2.04684	13.1907	3.60611	20.3806	12.2729
T303_05720	acetolactate synthase	Chromosome:1051376-1053053	1677	322.254	389.134	441.778	392.701	488.374	384.76
T303_05725	alpha-acetolactate decarboxylase	Chromosome:1053068-1053788	720	390.051	689.176	505.309	725.334	704.493	846.16
T303_05735	ABC transporter permease	Chromosome:1055354-1056059	705	13.4773	19.7387	12.9633	29.2406	22.9717	29.9145
T303_05740	short-chain dehydrogenase	Chromosome:1056280-1057033	753	13.3898	15.1108	16.5716	26.6242	24.6086	25.725
T303_05745	hypothetical protein	Chromosome:1057209-1057422	213	68.7678	54.8885	57.1559	54.5377	59.7211	105.258
T303_05750	TetR family transcriptional regulator	Chromosome:1057460-1058036	576	73.4596	41.4999	73.0309	78.6285	78.2259	115.435
T303_05755	cation transporter	Chromosome:1058133-1059030	897	5.6165	3.95121	4.02738	6.38257	18.4191	28.2522
T303_05760	ferrochelatase	Chromosome:1059141-1060236	1095	11.9959	8.44703	38.494	17.3868	69.3583	46.9294
T303_05765	molecular chaperone GroES	Chromosome:1060332-1061370	1038	437.692	356.508	253.917	647.697	192.609	616.016
T303_05770	hypothetical protein	Chromosome:1061448-1061547	99	0	0	0	0	0	0
T303_05775	hypothetical protein	Chromosome:1061783-1061963	180	172.364	67.2541	59.9964	73.563	54.9321	31.9202
T303_05780	alpha/beta hydrolase	Chromosome:1062041-1062491	450	246.437	60.9698	80.2265	72.0704	71.547	50.7209
T303_05785	hypothetical protein	Chromosome:1062681-1062960	279	3.54554	2.94419	1.48131	3.82721	1.15175	3.5078
T303_05795	hypothetical protein	Chromosome:1063399-1063528	129	0	0	6.37232	0	0	0
T303_05800	phosphorylase	Chromosome:1063755-1064520	765	2.85532	2.7744	63.9588	9.71887	94.9926	53.538
T303_05805	5'-nucleotidase	Chromosome:1064581-1065217	636	30.768	27.5074	130.028	54.034	165.888	204.457
T303_05810	ferrichrome ABC transporter substrate-binding protein	Chromosome:1065338-1065590	252	16.2693	9.11632	6.65105	20.4671	28.6375	49.0291
T303_05815	hypothetical protein	Chromosome:1065632-1065908	276	19.4117	17.158	16.5346	28.0685	50.015	74.0004
T303_05825	dihydroorotate dehydrogenase	Chromosome:1068143-1069802	1659	15.4445	13.2153	261.672	41.0624	357.61	313.885
T303_05830	membrane protein LaaN	Chromosome:1069993-1070602	609	1.12577	0.96152	4.68662	1.58436	7.90362	8.89053
T303_05835	4-methyl-5(B-hydroxyethyl)-thiazole monophosphate biosynthesis protein	Chromosome:1070734-1071283	549	524.893	337.677	323.363	514.388	229.009	187.546
T303_05840	dihydroorotate dehydrogenase	Chromosome:1071460-1072327	867	130.895	201.623	245.858	211.32	222.105	155.691
T303_05845	dihydroorotate dehydrogenase	Chromosome:1072345-1073293	948	129.81	130.132	254.283	155.972	269.036	206.289
T303_05850	CRISPR-associated protein Cas1	Chromosome:1073431-1074765	1334	24.3698	12.7812	34.2902	25.5551	25.7899	18.1625
T303_05855	CRISPR-associated protein Cas2	Chromosome:1073431-1074765	1334	29.2118	14.3529	40.5995	22.0816	33.8646	21.737
T303_05860	CRISPR-associated protein Cas6	Chromosome:1075253-1078242	2989	10.1582	19.0652	58.1788	21.5294	63.9678	48.7036
T303_05865	CRISPR-associated protein Csm1	Chromosome:1075253-1078242	2989	12.8114	18.6582	75.7022	27.924	89.1899	75.428
T303_05870	CRISPR-associated protein Csm2	Chromosome:1078245-1079288	1043	12.6214	15.0008	76.7365	30.2487	99.7745	100.632
T303_05875	CRISPR-associated protein Cmr4	Chromosome:1078245-1079288	1043	13.4091	12.42	77.5465	22.8171	92.6194	90.2541
T303_05880	CRISPR-associated protein Csm4	Chromosome:1079289-1080189	900	12.4394	9.29695	66.5367	20.0866	85.9058	79.5843
T303_05885	CRISPR-associated protein Csm5	Chromosome:1080191-1081265	1074	14.8305	7.39502	86.1557	21.477	103.922	89.3933
T303_05895	orotidine 5'-phosphate decarboxylase	Chromosome:1082260-1082956	696	105.526	262.416	184.185	198.85	171.167	124.276
T303_05900	orotate phosphoribosyltransferase	Chromosome:1083045-1083675	630	187.871	363.043	338.419	367.718	305.518	729.228
T303_05905	hypothetical protein	Chromosome:1083758-1083857	99	0	0	0	0	0	0
T303_05910	hypothetical protein	Chromosome:1084183-1084354	171	9.59855	1.8368	3.42908	0	13.9627	6.88812
T303_05915	peptide ABC transporter permease	Chromosome:1084372-1085824	1452	23.596	18.8943	798.182	77.8546	747.972	657.132
T303_05925	hypothetical protein	Chromosome:1086928-1088702	1774	192.896	341.221	322.665	294.841	415.892	272.821
T303_05930	hypothetical protein	Chromosome:1086928-1088702	1774	496.431	1330.73	850.596	1397.51	1304.59	1306.6
T303_05935	5'-nucleotidase	Chromosome:1086928-1088702	1774	140.615	275.702	151.575	211.471	235.323	249.973
T303_05940	hypothetical protein	Chromosome:1088712-1089000	288	103.314	226.379	102.612	169.999	156.774	217.2
T303_05945	AraC family transcriptional regulator	Chromosome:1089209-1089818	609	28.3127	20.3549	7.51644	29.2661	16.4478	24.1845
T303_05950	AraC family transcriptional regulator	Chromosome:1090047-1090176	129	43.6714	56.0185	0	0	16.3712	23.2926
T303_05955	tRNA modification GTPase	Chromosome:1090291-1091662	1371	441.598	127.064	182.628	347.677	167.067	183.408
T303_05960	sodium:alanine symporter	Chromosome:1091790-1093134	1344	15.6356	9.44686	66.0935	19.1127	401.844	129.208
T303_05965	ATP-dependent DNA helicase PcrA	Chromosome:1093631-1095962	2331	17.0961	13.5719	259.311	32.7021	282.358	214.934
T303_05970	O-acetylhomoserine (thiol)-lyase	Chromosome:1096049-1097363	1314	5.68291	4.39141	198.296	15.4622	117.597	45.3139
T303_05975	haloacid dehalogenase	Chromosome:1097423-1097765	342	21.4357	8.36193	100.598	16.1266	126.322	95.7524
T303_05980	hypothetical protein	Chromosome:1097810-1098179	369	19.6503	4.2729	60.4468	11.8006	78.7438	71.7452
T303_05985	lipid hydroperoxide peroxidase	Chromosome:1098243-1098738	495	311.281	229.261	294.233	368.859	375.416	618.224
T303_05990	type I restriction endonuclease subunit S	Chromosome:1098860-1099481	621	56.0063	35.7787	115.419	52.0611	148.697	177.94
T303_06000	truB; tRNA pseudouridine synthase B	Chromosome:1101158-1102957	1799	122.24	131.998	136.041	242.884	148.842	116.553
T303_06005	riboflavin biosynthesis protein RibF	Chromosome:1101158-1102957	1799	157.189	179.182	144.309	305.92	170.232	168.144
T303_06010	ArsR family transcriptional regulator	Chromosome:1103017-1104462	1445	1005.13	1118.07	751.354	2145.58	810.705	8464.09
T303_06015	hypothetical protein	Chromosome:1103017-1104462	1445	166.683	122.001	232.446	289.162	255.787	211.856
T303_06020	inositol monophosphatase	Chromosome:1103017-1104462	1445	213.486	143.041	286.454	365.412	339.178	269.653
T303_06025	23S rRNA methyltransferase	Chromosome:1104544-1105855	1311	276.436	173.827	348.515	413.932	422.507	365.882
T303_06030	phosphate-binding protein	Chromosome:1105955-1106855	900	389.125	213.828	548.473	512.655	854.909	639.384
T303_06035	phosphate ABC transporter permease	Chromosome:1106857-1108646	1789	385.36	218.061	517.818	502.001	840.77	721.391
T303_06040	phosphate ABC transporter permease	Chromosome:1106857-1108646	1789	417.011	212.984	538.654	500.643	905.614	902.6
T303_06045	pstB; phosphate ABC transporter ATP-binding protein	Chromosome:1108656-1109460	804	417.542	197.274	557.995	448.542	959.605	1221.38
T303_06050	phosphate ABC transporter ATP-binding protein	Chromosome:1109472-1110231	759	467.247	218.048	656.874	497.573	1145.18	1546.16
T303_06055	PhoU family transcriptional regulator	Chromosome:1110255-1110912	657	565.83	264.914	823.435	620.1	1412.94	1866.37
T303_06060	aminopeptidase N	Chromosome:1111045-1113586	2541	102.257	80.866	815.333	194.798	1147.04	365.384
T303_06065	xerS; tyrosine recombinase XerS	Chromosome:1113747-1114818	1071	50.331	24.6572	13.5172	24.4844	48.721	66.3784
T303_06070	lipoate-protein ligase A	Chromosome:1115042-1116032	990	1418.46	2967.09	659.189	3312.45	372.563	3011.32
T303_06080	maltodextrin phosphorylase	Chromosome:1117370-1119635	2265	6706.23	10273.3	1797.84	6930.43	458.996	8292.57
T303_06085	4-alpha-glucanotransferase	Chromosome:1119636-1121136	1500	3951.13	4845.15	1675.86	3814.98	389.733	5823.1
T303_06090	LacI family transcription regulator	Chromosome:1121332-1121635	303	2.58041	1.72003	5.7817	1.58631	9.56601	9.02222
T303_06095	hypothetical protein	Chromosome:1121882-1122104	222	23.9271	32.9924	47.2551	25.7314	77.752	69.1092
T303_06100	preprotein translocase subunit TatA	Chromosome:1122437-1122626	189	90.8727	118.223	76.2076	97.8525	134.904	243.415
T303_06105	preprotein translocase subunit TatC	Chromosome:1122638-1126222	3584	48.6494	69.7161	50.1891	54.414	71.1387	103.144
T303_06110	OFeT family oxidase-dependent iron (Fe2+) transporter	Chromosome:1122638-1126222	3584	42.8108	62.0883	43.6596	46.7314	63.4439	76.0104
T303_06115	peroxidase	Chromosome:1122638-1126222	3584	28.6678	47.4579	31.1416	35.5857	45.1379	53.5698
T303_06120	iron ABC transporter substrate-binding protein	Chromosome:1126227-1127106	879	17.0731	31.7887	26.5344	28.1257	39.7163	44.0252
T303_06125	ferrichrome ABC transporter substrate-binding protein	Chromosome:1127361-1128408	1047	3.20547	3.74454	5.59393	5.0211	18.2844	23.8449
T303_06130	iron ABC transporter ATP-binding protein	Chromosome:1128419-1131111	2692	2.45442	3.72528	4.70921	5.38866	16.8655	18.991
T303_06135	ferrichrome ABC transporter permease	Chromosome:1128419-1131111	2692	2.2632	3.04695	4.53116	4.15432	14.4884	13.6612
T303_06140	ferrichrome ABC transporter permease	Chromosome:1128419-1131111	2692	6.34009	8.15889	6.55232	7.35798	16.6819	16.3519
T303_06145	alkaline amylopullulanase	Chromosome:1131587-1131893	306	107.527	34.5905	9.17483	29.4235	25.5498	48.6439
T303_06150	alkaline amylopullulanase	Chromosome:1131962-1132475	513	127.338	47.2948	9.72315	33.7815	24.8098	45.7786
T303_06155	hypothetical protein	Chromosome:1132538-1133301	763	107.698	56.2104	8.44209	31.2771	21.046	33.7829
T303_06160	hypothetical protein	Chromosome:1132538-1133301	763	135.316	62.7502	9.61696	41.0222	25.4437	35.3624
T303_06170	hypothetical protein	Chromosome:1135298-1135694	396	166.35	71.6026	6.7928	55.3704	16.9818	27.8337
T303_06175	hypothetical protein	Chromosome:1135809-1136052	243	248.376	108.446	10.4151	95.2089	26.9675	38.1257
T303_06180	dihydrolipoyl dehydrogenase	Chromosome:1136327-1138082	1755	526.973	455.222	245.287	460.158	282.043	371.696
T303_06185	branched-chain alpha-keto acid dehydrogenase subunit E2	Chromosome:1138252-1139641	1389	637.055	1064.7	195.954	834.946	249.08	503.282
T303_06190	TPP-dependent acetoin dehydrogenase complex, E1 protein subunit beta	Chromosome:1139798-1140812	1014	886.679	1818.81	202.334	1459.17	265.889	549.767
T303_06195	pyruvate dehydrogenase E1 subunit alpha	Chromosome:1140821-1141793	972	932.326	2401.15	182.149	1799.35	257.402	537.821
T303_06200	hypothetical protein	Chromosome:1141973-1142141	168	121.445	142.606	134.769	137.628	135.743	202.802
T303_06205	hypothetical protein	Chromosome:1142243-1142660	417	106.65	119.156	123.178	91.3582	140.317	130.258
T303_06215	CRISPR-associated protein Cas2	Chromosome:1145560-1146466	906	65.6049	20.014	185.25	45.0883	169.401	263.165
T303_06220	CRISPR-associated protein Cse1	Chromosome:1146467-1147409	942	95.0926	34.2904	254.232	72.3039	211.164	388.301
T303_06225	CRISPR-associated protein CasE	Chromosome:1147412-1148051	639	79.3623	29.0262	204.446	59.9006	171.084	297.945
T303_06230	CRISPR-associated protein Cas5	Chromosome:1148055-1148781	726	78.7467	47.9872	220.597	79.5248	180.209	400.406
T303_06235	CRISPR-associated protein CasC	Chromosome:1148794-1150445	1651	76.5722	87.2576	187.311	130.26	152.274	360.751
T303_06240	CRISPR-associated protein CasB	Chromosome:1148794-1150445	1651	36.7005	69.1633	119.121	89.3963	99.572	227.095
T303_06250	helicase	Chromosome:1152107-1155001	2894	21.6068	24.4054	85.1913	39.6333	60.8435	59.0716
T303_06255	hypothetical protein	Chromosome:1152107-1155001	2894	0	0	0	0	0	0
T303_06260	hypothetical protein	Chromosome:1155184-1157128	1944	58.043	48.1879	64.2419	76.8746	78.9359	122.595
T303_06265	dihydroorotase	Chromosome:1157202-1158471	1269	75.464	83.2317	86.0893	152.443	100.292	142.671
T303_06270	uracil-DNA glycosylase	Chromosome:1158490-1159171	681	56.5676	49.2016	73.3647	89.9715	78.8227	60.0235
T303_06275	cation transporter	Chromosome:1159357-1160554	1197	26.4585	15.9274	217.889	38.5372	260.036	95.4653
T303_06285	serine protease	Chromosome:1162167-1163635	1468	2003.62	1747.78	254.042	1447.41	162.228	794.251
T303_06290	lysophospholipase	Chromosome:1162167-1163635	1468	2091.11	1648.54	264.221	1485.71	163.796	779.258
T303_06295	lipase	Chromosome:1162167-1163635	1468	1930.46	1683.58	254.416	1501.91	149.898	898.262
T303_06300	protein kinase	Chromosome:1163638-1165216	1578	2338.46	1724.58	361.339	1770.73	201.475	2161.74
T303_06305	hypothetical protein	Chromosome:1165233-1165512	279	2895.16	4117.65	464.835	6021.15	190.731	13115.8
T303_06320	epsP	Chromosome:1168489-1169005	516	118.92	74.4016	78.8547	131.805	60.2962	97.0922
T303_06325	epsO	Chromosome:1169100-1169672	572	71.835	46.4128	64.0265	99.2693	40.0419	59.6641
T303_06326	hypothetical protein	Chromosome:1169100-1169672	572	24.5008	17.5485	35.4921	64.5486	34.7799	20.5674
T303_06327	hypothetical protein	Chromosome:1169939-1170053	114	0	0	0	0	0	0
T303_06330	orf14.9	Chromosome:1170119-1170695	576	11.4313	9.05151	45.8194	18.2583	77.5348	92.691
T303_06336	epsN	Chromosome:1172155-1173253	1098	60.9975	31.1185	248.075	77.839	386.333	221.902
T303_06345	epsM	Chromosome:1173399-1174542	1143	50.1096	31.1811	197.619	70.723	306.719	122.391
T303_06350	epsL	Chromosome:1174619-1176035	1416	28.5385	16.285	121.178	40.5129	202.72	43.1771
T303_06355	epsK	Chromosome:1176384-1177335	951	72.4179	58.79	214.82	118.656	339.669	98.323
T303_06360	eps2D	Chromosome:1177743-1178001	258	111.95	119.344	302.123	195.176	494.508	137.121
T303_06365	eps2C	Chromosome:1178012-1178192	180	120.713	127.023	359.429	242.321	536.81	157.75
T303_06370	epsJ	Chromosome:1178501-1179470	969	52.9659	55.7966	133.647	106.911	234.09	40.5828
T303_06375	epsI	Chromosome:1179491-1179827	336	46.1428	51.9497	105.335	92.3977	176.979	41.2386
T303_06380	epsH	Chromosome:1180190-1180742	552	17.0569	9.60722	43.1117	20.2438	84.5429	10.1239
T303_06385	epsG	Chromosome:1180757-1181537	780	106.317	69.8062	130.996	119.686	230.472	37.4017
T303_06395	epsF	Chromosome:1182877-1183141	264	439.517	363.002	472.366	509.518	712.852	180.711
T303_06400	epsE	Chromosome:1183173-1184541	1368	355.769	314.636	374.426	433.02	553.708	146.604
T303_06405	eps1D	Chromosome:1184639-1185338	699	421.559	501.401	370.291	712.541	525.544	205.731
T303_06410	eps1C	Chromosome:1185347-1186040	693	412.616	476.141	356.537	680.777	538.877	255.403
T303_06415	epsB	Chromosome:1186048-1186780	732	415.782	467.372	325.379	720.157	483.215	301.48
T303_06420	epsA	Chromosome:1186780-1188241	1461	369.159	302.45	264.879	533.566	384.598	244.552
T303_06430	purine nucleoside phosphorylase	Chromosome:1189908-1190619	711	371.912	504.642	443.36	539.023	399.629	421.939
T303_06445	purine nucleoside phosphorylase	Chromosome:1192927-1193737	810	768.625	1597.3	772.91	1614.29	730.716	923.165
T303_06455	phosphopentomutase	Chromosome:1194302-1195514	1212	797.238	1964.83	657.617	1936.21	593.859	629.016
T303_06460	ribose 5-phosphate isomerase	Chromosome:1195639-1196320	681	464.206	1153.35	596.282	1141.85	532.536	206.966
T303_06465	hypothetical protein	Chromosome:1196610-1196883	273	24.0126	28.3192	12.8344	24.9606	11.2972	17.5395
T303_06470	hypothetical protein	Chromosome:1196947-1197052	105	0	0	0	0	0	0
T303_06480	uracil-DNA glycosylase	Chromosome:1198338-1198947	609	82.1779	17.4174	86.0501	18.7091	89.4591	57.2505
T303_06485	dipeptidase PepV	Chromosome:1198960-1200367	1407	664.351	966.677	853.398	1141.6	650.334	402.708
T303_06490	4-oxalocrotonate tautomerase	Chromosome:1200597-1200783	186	699.116	927.59	278.493	2285.69	236.527	869.08
T303_06495	GNAT family acetyltransferase	Chromosome:1200858-1201332	474	163.512	189.374	14.1728	209.623	21.6259	21.381
T303_06505	50S ribosomal protein L20	Chromosome:1202124-1202484	360	672.206	902.004	2576.2	1120.89	4057.38	2975.93
T303_06510	rpmI; 50S ribosomal protein L35	Chromosome:1202540-1202741	201	634.144	1072.71	2055.39	1312.23	3409.64	2734.49
T303_06515	translation initiation factor IF-3	Chromosome:1202779-1203310	531	504.983	901.698	1907.68	858.911	3181.66	2125.55
T303_06520	cytidylate kinase	Chromosome:1203469-1204150	681	184.243	293.599	411.874	353.058	741.67	1072.04
T303_06525	peptidoglycan-binding protein LysM	Chromosome:1204170-1204821	651	442.877	462.709	670.008	650.029	932.504	1380.49
T303_06530	ferredoxin	Chromosome:1204866-1205548	682	939.295	539.774	480.229	730.299	704.658	743.451
T303_06535	pore forming protein	Chromosome:1204866-1205548	682	302.179	257.765	329.886	431.194	526.023	439.794
T303_06540	peptidase T	Chromosome:1205604-1206828	1224	371.095	389.338	121.855	650.87	136.434	178.9
T303_06545	hypothetical protein	Chromosome:1206908-1207593	685	0	0	6.88021	0	4.04256	0
T303_06550	signal peptidase	Chromosome:1206908-1207593	685	973.065	1955.55	510.721	1557.47	688.118	1851.63
T303_06555	hypothetical protein	Chromosome:1207715-1210113	2398	78.3801	40.9882	246.863	93.9684	220.551	115.449
T303_06560	membrane protein	Chromosome:1207715-1210113	2398	103.121	65.9719	231.406	137.328	198.797	151.999
T303_06565	DNA mismatch repair protein MutT	Chromosome:1210123-1210606	483	103.04	87.3934	212.668	173.828	179.542	144.17
T303_06570	cell division protein FtsX	Chromosome:1210761-1212391	1630	246.439	182.922	474.493	321.855	508.29	633.177
T303_06575	cell division protein FtsE	Chromosome:1210761-1212391	1630	269.412	248.563	456.063	382.316	493.747	532.044
T303_06580	peptide chain release factor 2	Chromosome:1212463-1213477	1014	271.537	293.017	397.118	425.76	404.485	371.317
T303_06585	iron-sulfur cluster-binding protein	Chromosome:1213614-1214733	1119	194.607	196.409	22.0799	272.748	40.4528	85.9609
T303_06590	phosphoesterase	Chromosome:1214745-1215684	939	22.1079	13.6686	34.2898	23.372	56.6823	63.9621
T303_06595	NADPH-flavin oxidoreductase	Chromosome:1215707-1216454	747	318.985	255.295	56.0795	233.773	133.68	373.84
T303_06600	ATPase	Chromosome:1216562-1219247	2685	546.789	851.003	816.467	714.129	636.714	441.507
T303_06605	50S ribosomal protein L19	Chromosome:1219512-1219899	387	731.628	1004.64	82.0827	1100.84	115.053	1146.54
T303_06610	acetyltransferase	Chromosome:1219990-1220281	291	445.271	619.377	79.6132	484.128	116.617	455.497
T303_06615	hypothetical protein	Chromosome:1220763-1220883	120	795.841	1296.33	229.361	1023.29	201.675	728.822
T303_06620	sugar phosphate phosphatase	Chromosome:1221090-1221900	810	210.218	207.835	264.995	313.442	236.832	225.73
T303_06625	UDP-N-acetylmuramoylpentapeptide-lysine N(6)-alanyltransferase	Chromosome:1221901-1223116	1215	242.985	274.019	309.968	369.234	298.55	279.118
T303_06635	metallo-hydrolase	Chromosome:1223588-1226447	2859	652.668	448.66	213.75	450.018	241.907	332.12
T303_06640	sensor kinase	Chromosome:1223588-1226447	2859	925.616	592.86	229.617	803.065	249.598	353.492
T303_06645	PhoP family transcriptional regulator	Chromosome:1223588-1226447	2859	1368.25	1142.9	267.556	1619.74	268.55	490.315
T303_06650	artP; arginine ABC transporter ATP-binding protein	Chromosome:1226973-1227741	768	2669.73	2916.04	1643.04	3768.43	1266.08	1585.69
T303_06655	glutamine ABC transporter substrate-binding protein	Chromosome:1227752-1228586	834	2297.63	2007.76	1461.88	2604.43	1149.37	1199.72
T303_06660	glutamine ABC transporter permease	Chromosome:1228603-1229302	699	2577.37	2068.45	1641.24	2371.05	1276.61	1182.02
T303_06665	glutamine ABC transporter permease	Chromosome:1229313-1229964	651	3104.8	1990.33	2013.78	1338.06	1590.02	980.761
T303_06670	DNA-entry nuclease	Chromosome:1230035-1230917	882	55.2916	52.9746	96.2133	64.6918	187.283	133.231
T303_06675	DNA-directed RNA polymerase subunit beta	Chromosome:1230978-1231167	189	185.776	131.807	560.771	229.724	813.898	936.917
T303_06680	UDP-N-acetylglucosamine 1-carboxyvinyltransferase	Chromosome:1231168-1232455	1287	143.137	167.196	418.552	281.382	641.709	665.536
T303_06685	membrane protein	Chromosome:1232509-1232746	237	45.1437	42.0122	154.858	83.3132	183.45	107.753
T303_06690	UDP-galactose-4-epimerase	Chromosome:1232934-1233948	1014	569.322	1472.2	191.003	1595.82	312.861	826.064
T303_06695	hypothetical protein	Chromosome:1233962-1234418	456	187.449	398.322	92.8508	364.527	150.75	300.566
T303_06700	S-adenosylmethionine synthetase	Chromosome:1235438-1236632	1194	55.6199	52.7939	674.849	141.52	700.775	467.064
T303_06705	GntR family transcriptional regulator	Chromosome:1236911-1238022	1111	244.635	136.882	129.572	233.299	122.442	194.953
T303_06710	hypothetical protein	Chromosome:1236911-1238022	1111	186.81	94.562	110.931	116.481	111.796	202.471
T303_06715	DNA polymerase III subunit gamma/tau	Chromosome:1238248-1240365	2117	88.7998	77.0024	237.226	96.238	295.558	188.392
T303_06720	30S ribosomal protein S1	Chromosome:1238248-1240365	2117	51.0124	54.8938	156.322	74.2751	177.525	115.356
T303_06725	tRNA delta(2)-isopentenylpyrophosphate transferase	Chromosome:1240444-1241596	1152	32.6874	55.5808	126.619	69.573	155.605	76.61
T303_06730	hypothetical protein	Chromosome:1240444-1241596	1152	2068	4691.04	688.8	8098.18	377.104	1043.7
T303_06735	hypothetical protein	Chromosome:1241647-1242175	528	246.04	145.782	55.5408	122.217	91.1463	102.747
T303_06740	tRNA-Arg	Chromosome:1242405-1242477	72	0	0	0	0	0	0
T303_06745	rplS; 50S ribosomal protein L19	Chromosome:1242527-1242875	348	161.61	228.138	2783.84	396.283	3829.97	2350.53
T303_06750	voltage-gated chloride channel protein	Chromosome:1243002-1244229	1227	22.1184	25.1165	87.8202	37.7277	183.891	161.303
T303_06755	chorismate mutase	Chromosome:1244238-1244511	273	25.5971	25.7074	89.8178	50.0923	198.572	122.797
T303_06760	ribonuclease HII	Chromosome:1244585-1246121	1536	12.1663	7.00415	74.8689	17.653	103.147	95.0591
T303_06765	flavodoxin	Chromosome:1246171-1246615	444	34.7026	23.1074	753.716	86.1724	775.474	854.693
T303_06775	Zn-dependent protease	Chromosome:1247082-1247802	720	31.87	22.983	273.774	57.3302	323.803	318.131
T303_06780	acetyl esterase	Chromosome:1247921-1248704	783	25.358	29.1974	96.0732	47.7754	127.011	108.997
T303_06785	ribonuclease J	Chromosome:1248828-1250490	1662	144.963	165.795	484.837	244.696	461.492	298.628
T303_06790	phosphonate ABC transporter ATP-binding protein	Chromosome:1250671-1252296	1625	101.705	159.311	108.192	129.467	262.175	307.637
T303_06795	branched-chain amino acid ABC transporter permease	Chromosome:1250671-1252296	1625	108.153	152.375	86.0603	134.111	207.795	245.146
T303_06800	peptide ABC transporter substrate-binding protein	Chromosome:1252305-1253307	1002	109.777	156.184	81.7518	130.332	177.922	187.168
T303_06805	hypothetical protein	Chromosome:1253441-1253663	222	699.249	1083.96	552.826	1581.59	364.329	851.238
T303_06810	hypothetical protein	Chromosome:1253864-1254555	691	1.16915	2.89659	2.80724	2.56364	5.19718	17.0922
T303_06815	hypothetical protein	Chromosome:1253864-1254555	691	1.6575	2.00923	3.63137	2.20803	8.92779	18.471
T303_06820	hypothetical protein	Chromosome:1254649-1254940	291	2.9349	2.69087	2.88064	7.48514	9.65357	15.3608
T303_06825	hypothetical protein	Chromosome:1255106-1255286	180	4.97072	4.99836	3.97906	2.34461	12.2286	20.1494
T303_06830	hypothetical protein	Chromosome:1255902-1256085	183	0	0	0.584834	0	0.609712	0
T303_06835	transposase IS1193	Chromosome:1256222-1257551	1329	0	0	0	0	0	0
T303_06840	pyruvate kinase	Chromosome:1257635-1259138	1503	8385.59	13630.7	4753.32	16727.6	4168.75	9799.46
T303_06845	6-phosphofructokinase	Chromosome:1259207-1260227	1020	2187.75	3981.24	3434.23	4621.49	3148.02	1424.05
T303_06850	dnaE; DNA polymerase III subunit alpha	Chromosome:1260319-1263430	3111	192.165	166.684	104.5	158.486	112.179	101.615
T303_06855	translation factor (SUA5)	Chromosome:1263582-1264368	786	145.694	138.298	528.417	298.885	750.674	785.735
T303_06860	isopropylmalate isomerase	Chromosome:1264464-1265055	591	80.1188	51.0684	76.3018	117.17	233.12	392.493
T303_06865	isopropylmalate isomerase	Chromosome:1265064-1266459	1395	88.5966	68.9668	73.5898	147.482	194.536	315.87
T303_06870	membrane protein	Chromosome:1266477-1266759	282	85.2014	66.9638	74.0639	157.982	168.772	253.839
T303_06875	3-isopropylmalate dehydrogenase	Chromosome:1266763-1267810	1047	86.1984	75.4513	76.3455	194.828	175.404	240.643
T303_06880	2-isopropylmalate synthase	Chromosome:1267813-1269376	1563	59.0029	76.2638	61.5412	213.158	114.999	146.107
T303_06885	phosphoglycerate mutase	Chromosome:1269723-1270416	693	720.792	833.702	4731.4	1819.97	3998.43	1984.71
T303_06890	dihydroorotate dehydrogenase	Chromosome:1270625-1271609	984	110.288	91.4518	279.204	160.742	329.622	260.177
T303_06895	hypothetical protein	Chromosome:1271673-1271874	201	527.908	410.562	424.094	243.869	424.377	561.096
T303_06900	transcriptional regulator	Chromosome:1271932-1272208	276	6526.24	13114.9	7829.81	15937.9	4482.1	8800.92
T303_06905	membrane protein	Chromosome:1272344-1274611	2267	593.681	613.015	451.771	647.169	426.753	416.15
T303_06910	GDSL family lipase	Chromosome:1272344-1274611	2267	651.587	615.73	518.689	681.014	468.487	405.154
T303_06915	hypothetical protein	Chromosome:1272344-1274611	2267	601.752	497.704	634.403	604.757	518.367	368.026
T303_06920	DNA repair protein RecN	Chromosome:1274681-1276352	1671	510.513	351.352	457.135	485.118	301.212	191.994
T303_06925	ArgR family transcriptional regulator	Chromosome:1276360-1280019	3659	452.007	287.195	460.799	426.053	302.896	177.413
T303_06930	cell division protein FtsJ	Chromosome:1276360-1280019	3659	410.101	257.384	433.354	378.429	284.829	157.768
T303_06935	geranyltranstransferase	Chromosome:1276360-1280019	3659	417.962	257.898	469.574	392.201	299.509	163.799
T303_06940	exodeoxyribonuclease VII small subunit	Chromosome:1276360-1280019	3659	173.252	98.5371	220.12	200.085	147.752	79.1984
T303_06945	exodeoxyribonuclease VII large subunit	Chromosome:1276360-1280019	3659	231.387	145.877	374.845	212.327	243.579	100.026
T303_06950	hypothetical protein	Chromosome:1280207-1280453	246	136.893	56.335	343.145	127.052	1046.55	1444.71
T303_06955	hypothetical protein	Chromosome:1280753-1280873	120	549.019	325.43	1040.07	369.11	2223.39	2467.35
T303_06960	hypothetical protein	Chromosome:1280873-1280978	105	434.539	0	2258.01	908.971	1456.34	6132.88
T303_06965	endonuclease III	Chromosome:1281104-1282447	1343	136.161	82.8121	248.023	120.332	345.187	304.403
T303_06970	DNA replication protein DnaD	Chromosome:1281104-1282447	1343	170.002	116.791	279.045	179.073	379.08	301.25
T303_06975	homoserine O-succinyltransferase	Chromosome:1282518-1283463	945	178.722	119.528	302.645	213.716	379.41	251.807
T303_06980	adenine phosphoribosyltransferase	Chromosome:1283633-1284152	519	271.697	168.29	1625.02	387.294	1176.74	543.4
T303_06985	single-stranded DNA exonuclease	Chromosome:1284266-1286477	2211	67.7246	77.1275	168.522	97.3864	199.464	128.264
T303_06990	short-chain dehydrogenase	Chromosome:1286489-1288186	1697	122.054	148.126	384.789	173.321	411.962	245.351
T303_06995	ribonuclease Z	Chromosome:1286489-1288186	1697	144.216	182.441	378.109	209.497	401.549	250.985
T303_07000	cystathionine beta-lyase	Chromosome:1288217-1290096	1879	202.379	269.259	378.899	278.068	402.91	271.03
T303_07005	GTP-binding protein HflX	Chromosome:1288217-1290096	1879	244.735	320.907	331.267	319.729	325.901	255.492
T303_07010	transposase IS1198	Chromosome:1290302-1291307	1005	406.417	601.706	98.1099	668.89	80.9872	205.39
T303_07015	cell division protein	Chromosome:1291434-1292889	1455	59.6609	59.1933	478.797	124.456	402.11	293.367
T303_07020	phosphoribosyl-ATP pyrophosphatase	Chromosome:1293354-1293669	315	18.5922	6.62101	132.199	20.8335	135.455	42.7045
T303_07025	phosphoribosyl-AMP cyclohydrolase	Chromosome:1293677-1294771	1094	14.1216	5.59116	89.8713	15.5842	98.2306	30.7869
T303_07030	imidazole glycerol phosphate synthase	Chromosome:1293677-1294771	1094	11.0093	6.22972	86.7283	19.2973	89.0076	31.8831
T303_07035	1-(5-phosphoribosyl)-5-[(5-phosphoribosylamino)methylideneamino] imidazole-4-carboxamide isomerase	Chromosome:1294772-1295492	720	13.8409	8.40418	110.149	25.3164	106.358	41.0399
T303_07040	hisH; imidazole glycerol phosphate synthase	Chromosome:1295540-1296730	1190	9.53548	7.27893	83.08	20.618	81.5369	30.4684
T303_07045	hisB; imidazoleglycerol-phosphate dehydratase	Chromosome:1295540-1296730	1190	10.878	6.71071	85.7292	22.3861	88.3325	35.6736
T303_07050	histidinol dehydrogenase	Chromosome:1296749-1300702	3953	9.60052	6.34858	84.0247	18.2815	89.975	30.3701
T303_07055	ATP phosphoribosyltransferase	Chromosome:1296749-1300702	3953	7.06464	5.77018	81.3385	15.6614	91.0458	27.2906
T303_07060	ATP phosphoribosyltransferase	Chromosome:1296749-1300702	3953	6.75095	4.91367	79.3916	16.1256	91.2237	25.6122
T303_07065	histidinol-phosphate aminotransferase	Chromosome:1296749-1300702	3953	4.31305	3.37903	72.6007	10.2286	90.4879	19.0327
T303_07080	transposase IS861	Chromosome:1301899-1302238	339	8.07003	6.51771	47.8199	17.7817	53.356	48.5
T303_07090	exopolysaccharide biosynthesis protein	Chromosome:1303101-1303641	540	15.5755	20.2085	8.95797	11.3992	13.9507	15.8867
T303_07095	exopolysaccharide biosynthesis protein	Chromosome:1303737-1303944	207	15.5348	26.9606	12.4309	12.1411	13.8186	16.0137
T303_07100	hypothetical protein	Chromosome:1304040-1306191	2151	142.259	132.815	234.081	155.843	284.112	238.354
T303_07105	membrane protein	Chromosome:1304040-1306191	2151	132.776	115.819	223.021	140.954	259.33	205.963
T303_07110	HAD family hydrolase	Chromosome:1304040-1306191	2151	123.949	102.218	239.18	140.336	283.008	198.274
T303_07115	acyl-ACP thioesterase	Chromosome:1306192-1306936	744	82.875	84.3033	168.221	103.182	200.97	127.201
T303_07120	coproporphyrinogen III oxidase	Chromosome:1306936-1308073	1137	83.1859	71.3382	217.638	98.4178	257.815	116.661
T303_07125	hypothetical protein	Chromosome:1308341-1308512	171	1.76752	7.97241	0.914965	0	2.5729	13.7784
T303_07130	hypothetical protein	Chromosome:1308663-1308864	201	2.19317	0.887672	1.6572	2.9559	16.3609	8.93072
T303_07135	hypothetical protein	Chromosome:1309039-1309369	330	7.02226	8.86169	12.6699	13.9146	50.4152	83.7891
T303_07150	transposase IS1193	Chromosome:1310322-1311579	1257	0	0	0	0.0431604	0	0.0261889
T303_07155	dTDP-glucose 4,6-dehydratase	Chromosome:1311624-1312671	1047	695.782	813.013	1290.66	1186.08	1218.66	1172.04
T303_07160	dTDP-4-dehydro-rhamnose 3,5-epimerase	Chromosome:1313099-1314562	1463	539.307	467.552	1066.51	750.867	964.112	642.137
T303_07165	dTDP-glucose pyrophosphorylase	Chromosome:1313099-1314562	1463	557.539	485.923	887.263	808.415	769.293	538.943
T303_07170	glycine/D-amino acid oxidase (Deaminating)	Chromosome:1314793-1315885	1092	200.272	147.639	87.6923	191.767	100.82	112.415
T303_07180	hypothetical protein	Chromosome:1316791-1318256	1465	149.271	127.878	101.013	181.434	117.734	129.067
T303_07185	SAM-dependent methyltransferase	Chromosome:1316791-1318256	1465	92.6113	92.7678	77.4086	103.469	102.431	56.2202
T303_07190	sugar translocase	Chromosome:1318353-1318794	441	400.474	774.088	380.616	688.999	448.207	609.545
T303_07195	phosphoglucosamine mutase	Chromosome:1318796-1320149	1353	393.162	818.836	350.99	793.817	393.291	998.637
T303_07200	hypothetical protein	Chromosome:1320371-1322191	1820	214.974	287.246	195.778	376.636	189.839	210.987
T303_07205	membrane protein	Chromosome:1320371-1322191	1820	130.155	205.975	162.987	256.12	167.838	107.273
T303_07210	UDP-N-acetylmuramyl peptide synthase	Chromosome:1322286-1324418	2132	146.169	172.707	376.004	246.884	370.365	157.804
T303_07215	glutamine amidotransferase	Chromosome:1322286-1324418	2132	241.525	220.509	447.225	319.207	441.146	194.459
T303_07220	lysyl-tRNA synthetase (class II)	Chromosome:1324468-1327740	3272	678.675	629.574	133.358	791.839	152.776	214.18
T303_07225	oxidoreductase	Chromosome:1324468-1327740	3272	961.24	1672.67	173.324	2123.63	205.936	683.454
T303_07235	multidrug ABC transporter ATP-binding protein	Chromosome:1328265-1330185	1920	143.138	41.4314	143.103	56.8987	168.973	91.426
T303_07240	uridine/cytidine kinase	Chromosome:1330221-1330857	636	209.496	117.802	837.629	207.098	624.012	346.063
T303_07245	RNA helicase	Chromosome:1330955-1332197	1242	189.19	96.5725	192.832	182.891	187.577	173.754
T303_07250	hypothetical protein	Chromosome:1330955-1332197	1242	7.27542	1.77534	3.7597	6.26429	3.03227	6.08165
T303_07255	glyceraldehyde-3-phosphate dehydrogenase	Chromosome:1332326-1333760	1434	1929.41	3173.75	1674.78	3995.08	1384.6	697.229
T303_07260	transposase IS1193	Chromosome:1333997-1335326	1329	0	0	0	0	0	0
T303_07265	phosphoenolpyruvate-protein phosphotransferase	Chromosome:1335401-1337135	1734	6990.17	7980.33	3534.49	7139.9	2822.85	2623.4
T303_07270	phosphocarrier protein HPr	Chromosome:1337139-1337403	264	22561.5	41817.1	8281.2	43942.3	6351.21	31608.4
T303_07275	isocitrate dehydrogenase	Chromosome:1337664-1338840	1176	25.5455	24.7274	185.475	83.791	308.514	333.945
T303_07280	citrate synthase	Chromosome:1338854-1339979	1125	19.2602	19.9436	152.009	63.5324	249.228	222.989
T303_07285	aconitate hydratase	Chromosome:1339980-1342644	2664	9.09604	9.67385	119.394	34.7057	206.91	133.537
T303_07290	hypothetical protein	Chromosome:1342680-1342857	177	0	0	0	0	0.811085	0
T303_07295	glutaredoxin	Chromosome:1342975-1343200	225	75.3551	45.4065	734.752	137.773	499.928	101.845
T303_07300	ribonucleotide-diphosphate reductase subunit alpha	Chromosome:1343286-1345446	2160	66.8006	34.0535	832.501	113.187	631.028	173.128
T303_07305	ribonucleoside-diphosphate reductase	Chromosome:1345605-1346568	963	78.4199	79.8038	457.189	149.581	459.433	219.592
T303_07325	hypothetical protein	Chromosome:1348365-1349334	969	80.5337	81.3782	177.827	113.068	222.237	251.947
T303_07335	sortase	Chromosome:1349885-1350647	762	159.025	92.0263	307.452	106.684	359.857	136.46
T303_07340	DNA gyrase subunit A	Chromosome:1350679-1353115	2436	107.403	71.7632	278.686	91.6058	312.269	134.906
T303_07345	lactate dehydrogenase	Chromosome:1353333-1354320	987	5660.13	5222.99	4576.82	7262.65	3655.96	4735.28
T303_07350	NADH oxidase	Chromosome:1354412-1355798	1386	1255.53	3695.97	809.902	3009.75	654.367	1009.1
T303_07355	heme ABC transporter ATP-binding protein	Chromosome:1356101-1357640	1539	9.75061	10.5863	111.859	25.7046	143.767	53.9194
T303_07360	membrane protein	Chromosome:1357733-1358309	576	5.57366	6.12108	30.0203	16.8262	53.1973	46.1838
T303_07370	membrane protein	Chromosome:1359157-1359667	510	6.88399	4.90753	52.1335	14.5876	76.1184	42.2903
T303_07375	hypothetical protein	Chromosome:1359804-1360335	531	28.2998	10.996	185.653	35.5143	274.501	170.567
T303_07380	GntR family transcriptional regulator	Chromosome:1360492-1361758	1266	10.6268	5.622	51.8803	16.2183	184.318	163.025
T303_07385	ribonucleoside-triphosphate reductase	Chromosome:1361801-1362140	339	1375.24	1293.37	596.544	1477.82	1051.66	2361.4
T303_07395	phenylalanyl-tRNA synthase subunit beta	Chromosome:1362871-1365322	2451	795.465	773.405	596.004	916.361	513.828	224.986
T303_07400	GNAT family acetyltransferase	Chromosome:1365580-1366099	519	385.933	352.136	500.385	502.598	447.033	175.442
T303_07405	pheS; phenylalanyl-tRNA synthase subunit alpha	Chromosome:1366115-1367365	1250	373.411	464.503	504.762	667.188	444.841	179.538
T303_07410	hypothetical protein	Chromosome:1366115-1367365	1250	290.106	368.622	583.9	506.515	523.129	175.642
T303_07415	chromosome segregation protein SMC	Chromosome:1367779-1371313	3534	688.85	462.836	388.368	478.984	365.936	234.916
T303_07420	ribonuclease III	Chromosome:1371315-1372029	714	322.563	195.961	207.336	230.476	195.924	68.2383
T303_07425	dihydrodipicolinate synthase	Chromosome:1372161-1373133	972	116.009	57.5105	560.273	117.273	714.517	179.604
T303_07430	aspartate-semialdehyde dehydrogenase	Chromosome:1373434-1374511	1077	44.3764	129.131	229.232	143.268	274.6	86.3974
T303_07435	acetyltransferase	Chromosome:1374871-1375453	582	4.09444	5.23853	60.3791	20.9791	97.5256	86.4796
T303_07445	cardiolipin synthetase	Chromosome:1376434-1377886	1452	524.689	265.364	329.652	392.781	321.289	523.863
T303_07450	excinuclease ABC subunit C	Chromosome:1378073-1379861	1788	515.241	237.156	155.978	387.791	140.912	252.354
T303_07455	HAD family hydrolase	Chromosome:1379920-1380616	696	69.3705	26.9564	239.939	72.5423	241.994	199.869
T303_07460	serine dehydratase subunit beta	Chromosome:1380851-1381565	714	79.7765	89.1149	116.083	123.692	117.503	141.34
T303_07470	hypothetical protein	Chromosome:1383168-1383738	570	9.66371	9.70308	6.7289	13.0932	8.59621	12.2148
T303_07475	multidrug ABC transporter permease	Chromosome:1383873-1384665	792	10.1685	11.3906	6.25285	16.77	7.12514	11.5574
T303_07490	hypothetical protein	Chromosome:1386661-1386766	105	0	0	647.866	3803.05	429.997	1597.4
T303_07495	transcriptional regulator	Chromosome:1386844-1390318	3474	11.8619	9.95909	75.4911	32.6623	136.486	117.511
T303_07500	histidine kinase	Chromosome:1386844-1390318	3474	9.86022	8.24077	61.386	25.1755	106.286	75.0052
T303_07505	ABC transporter	Chromosome:1386844-1390318	3474	4.10015	4.71944	13.5431	8.48633	12.7651	19.8142
T303_07510	multidrug ABC transporter ATP-binding protein	Chromosome:1386844-1390318	3474	3.35263	2.40516	11.7853	8.07451	9.91791	10.1636
T303_07515	hypothetical protein	Chromosome:1386844-1390318	3474	0.921768	1.89421	3.18858	1.94336	3.03143	2.29848
T303_07520	hypothetical protein	Chromosome:1390328-1390640	312	1.68002	1.93635	4.46516	3.25513	5.21589	2.19767
T303_07530	major facilitator superfamily permease	Chromosome:1391297-1392527	1230	4.07032	1.49166	28.7402	4.69314	27.506	10.0916
T303_07540	XRE family transcriptional regulator	Chromosome:1395210-1396086	876	5.74838	3.57334	8.11863	7.97798	12.7697	6.29851
T303_07545	NUDIX hydrolase	Chromosome:1396214-1396903	689	16.2524	35.0355	8.86174	47.8609	14.1351	21.1422
T303_07550	hypothetical protein	Chromosome:1396214-1396903	689	4.02145	3.52019	1.12213	10.7296	4.73542	5.59073
T303_07555	hypothetical protein	Chromosome:1397042-1397702	660	47.0831	109.719	14.0604	158.066	25.0189	36.1727
T303_07560	ABC transporter ATP-binding protein	Chromosome:1397704-1397977	273	58.0208	148.832	15.7967	218.17	25.2901	43.0802
T303_07565	hypothetical protein	Chromosome:1398047-1398725	678	67.1456	168.322	13.4091	299.697	23.3797	42.6286
T303_07570	hypothetical protein	Chromosome:1398862-1399528	666	70.745	65.9557	108.485	199.321	142.887	161.128
T303_07575	Fe-S-oxidoreductase	Chromosome:1399540-1400035	495	24.29	32.3688	60.3127	57.8526	72.8634	53.9381
T303_07580	peptide ABC transporter permease	Chromosome:1400119-1402120	2001	5.39661	5.62302	10.6219	10.4821	20.7361	22.9186
T303_07585	bacteriocin ABC transporter ATP-binding protein	Chromosome:1402121-1402880	759	5.56735	8.16945	9.31441	12.4976	19.8623	19.7052
T303_07590	sensor histidine kinase	Chromosome:1403024-1404669	1645	8.86753	7.8746	40.6158	17.1336	65.2001	47.0194
T303_07595	response regulator	Chromosome:1403024-1404669	1645	12.4256	13.421	44.0701	30.7894	69.1233	52.2939
T303_07610	hypothetical protein	Chromosome:1406613-1406967	354	8.92512	14.7579	38.0291	20.7361	9.40441	13.8703
T303_07615	multidrug transporter MatE	Chromosome:1407094-1408444	1350	28.8641	34.077	32.3539	61.5925	65.1724	33.5793
T303_07620	peptide methionine sulfoxide reductase MsrB	Chromosome:1408808-1409831	1023	4408.63	12144.6	168.641	18254.9	127.657	5667.02
T303_07625	branched-chain amino acid ABC transporter substrate-binding protein	Chromosome:1409895-1411224	1329	70.3894	92.2633	177.226	111.714	197.285	164.861
T303_07635	hypothetical protein	Chromosome:1412281-1412476	195	3679.35	1644.79	2750.64	4772.09	1224.41	1229.14
T303_07640	amino acid permease	Chromosome:1413346-1414732	1386	95.8207	61.8997	152.797	96.2964	263.249	162.982
T303_07645	hypothetical protein	Chromosome:1415157-1415760	603	52.2899	33.2098	97.0611	40.0412	191.29	212.623
T303_07650	glyoxalase	Chromosome:1415897-1416758	861	45.4434	49.7375	1.8544	40.0154	5.97817	7.11649
T303_07655	Rrf2 family transcriptional regulator	Chromosome:1416892-1417342	450	432.315	419.522	85.3175	451.522	172.964	402.649
T303_07660	acyltransferase	Chromosome:1417523-1419666	2143	114.297	49.1122	77.464	84.5182	121.511	167.736
T303_07665	PTS fructose transporter subunit IIA	Chromosome:1417523-1419666	2143	93.1165	37.2544	68.2456	71.3551	90.7082	116.525
T303_07670	NAD(P)H nitroreductase	Chromosome:1419854-1420508	654	276.431	262.303	811.725	526.725	734.102	1183.19
T303_07675	membrane protein	Chromosome:1420579-1421176	597	183.779	144.592	466.194	301.908	429.36	616.349
T303_07680	aldo/keto reductase	Chromosome:1421331-1422234	903	203.143	209.574	578.133	400.875	465.305	539.794
T303_07690	ATP-dependent Zn protease	Chromosome:1423643-1425128	1485	155.473	251.342	244.657	271.546	215.073	139.66
T303_07695	hypothetical protein	Chromosome:1425348-1425693	345	2273.76	6971.55	289.323	4860.93	210.546	4340.67
T303_07700	hypothetical protein	Chromosome:1426013-1426157	144	1995.86	2741.62	204.193	2705.85	125.392	521.157
T303_07710	cell wall surface anchor protein	Chromosome:1427171-1427627	456	1.27225	1.55024	2.12896	7.34681	16.0885	26.276
T303_07720	hypothetical protein	Chromosome:1427928-1429700	1772	20.977	25.0229	43.9511	112.579	137.733	281.504
T303_07725	DNA-directed DNA polymerase	Chromosome:1427928-1429700	1772	13.5696	17.6764	29.4542	69.2712	80.3392	172.941
T303_07730	hypothetical protein	Chromosome:1429851-1430121	270	1.01811	2.04889	8.94862	5.38507	16.9432	32.8322
T303_07735	hypothetical protein	Chromosome:1430248-1430437	189	3.27385	2.85764	24.679	16.2165	41.5643	18.2191
T303_07740	hypothetical protein	Chromosome:1430674-1430962	288	2.51606	3.39496	15.8937	4.07311	26.9616	2.39502
T303_07745	hypothetical protein	Chromosome:1431210-1431459	249	0.372935	0.624256	4.22286	2.29173	5.53206	1.09639
T303_07750	threonine transporter RhtB	Chromosome:1431669-1432287	618	2.85533	2.013	27.0678	7.89736	45.1566	18.3646
T303_07755	hypothetical protein	Chromosome:1432627-1432987	360	173.778	170.582	189.281	203.72	370.166	492.559
T303_07765	glycosyl transferase	Chromosome:1433545-1435639	2094	171.121	149.881	105.882	149.645	169.28	127.697
T303_07770	ABC transporter permease	Chromosome:1436286-1438013	1727	14.9659	14.7578	20.8734	27.6596	43.6499	70.3214
T303_07775	peptide ABC transporter ATP-binding protein	Chromosome:1436286-1438013	1727	0.0340319	0	0.0284558	0.0747789	0.106988	0
T303_07790	hypothetical protein	Chromosome:1439184-1439484	300	10.6163	8.34063	12.8744	8.78372	13.2553	2.90167
T303_07795	sodium transporter	Chromosome:1439583-1440495	912	15.894	14.1116	17.619	19.8916	18.2145	9.75948
T303_07800	hypothetical protein	Chromosome:1440724-1441422	698	0	0	0	0	0	0
T303_07805	coenzyme PQQ synthesis protein	Chromosome:1440724-1441422	698	5.34049	4.80088	12.7811	7.68384	14.7217	6.69073
T303_07810	major facilitator superfamily transporter	Chromosome:1441506-1442598	1092	0.893775	0.42553	3.54537	0.953908	4.88503	1.00369
T303_07820	hypothetical protein	Chromosome:1443984-1444128	144	184.785	80.6837	100.128	144.598	93.8099	227.031
T303_07825	MutR family transcriptional regulator	Chromosome:1444159-1445020	861	23.4697	29.7095	18.8124	54.2579	21.1232	41.1823
T303_07830	transposase	Chromosome:1445259-1446096	837	11.2283	17.5049	1.60371	19.5272	1.13861	5.49996
T303_07840	hypothetical protein	Chromosome:1446832-1446991	159	1.79149	10.5453	6.33541	7.48878	4.61544	11.9866
T303_07845	hypothetical protein	Chromosome:1447002-1447134	132	25.7484	10.2416	5.09933	30.1452	29.7655	40.6802
T303_07850	peptidylprolyl isomerase	Chromosome:1447143-1447776	633	10.2084	15.6962	5.12887	16.6132	8.82887	10.112
T303_07855	ATP-dependent dsDNA exonuclease	Chromosome:1448055-1452458	4403	192.195	172.718	57.9673	200.227	74.4003	129.188
T303_07860	ATP-dependent dsDNA exonuclease	Chromosome:1448055-1452458	4403	175.563	238.706	30.2887	261.986	46.7804	64.2764
T303_07865	beta-galactosidase	Chromosome:1453294-1456375	3081	468.591	923.899	462.11	869.522	0	0
T303_07870	lactose/galactose permease	Chromosome:1456378-1458283	1905	300.771	709.084	247.318	669.826	2793.7	11284.3
T303_07875	galactose mutarotase	Chromosome:1458385-1459432	1047	18.9404	25.5957	14.2002	35.7741	282.318	276.26
T303_07880	UDP-glucose 4-epimerase	Chromosome:1459501-1460503	1002	70.2616	124.525	30.1983	224.695	926.502	3286.27
T303_07885	galactose-1-phosphate uridylyltransferase	Chromosome:1460532-1463200	2668	52.7029	122.792	17.2153	176.775	702.455	2841.75
T303_07890	galactokinase	Chromosome:1460532-1463200	2668	48.1734	103.97	11.4388	153.369	480.796	1997.82
T303_07895	galactose operon repressor	Chromosome:1463341-1464337	996	258.942	524.488	85.5709	570.658	516.45	1827.81
T303_07905	metalloendopeptidase	Chromosome:1465492-1466788	1296	22.9822	35.8031	24.1444	46.015	70.6819	120.89
T303_07910	zinc metalloprotease ZmpB	Chromosome:1466828-1466987	159	20.1328	24.7715	26.2636	85.34	51.6958	77.963
T303_07915	ABC transporter ATP-binding protein	Chromosome:1467462-1467744	282	23.345	25.2709	158.898	75.6402	357.571	288.819
T303_07920	homoserine kinase	Chromosome:1467798-1468655	857	12.383	17.5885	83.4961	46.2006	167.758	140.001
T303_07925	multidrug ABC transporter ATPase	Chromosome:1467798-1468655	857	10.9074	15.5633	90.8039	32.7975	168.441	118.888
T303_07930	glutamate--cysteine ligase	Chromosome:1469339-1471604	2265	117.575	111.337	254.257	168.625	180.225	256.865
T303_07935	transposase IS1193	Chromosome:1471660-1473026	1366	67.2327	48.8048	31.3548	65.3869	36.8585	97.2534
T303_07940	glycogen debranching protein	Chromosome:1471660-1473026	1366	71.5472	60.5954	20.7675	74.2184	21.767	94.569
T303_07945	glycogen debranching protein	Chromosome:1473206-1473425	219	99.6014	76.0993	23.6483	101.079	22.9809	140.11
T303_07950	glycogen debranching protein	Chromosome:1473474-1474152	678	83.5763	82.2365	18.3948	95.6762	22.7019	130.404
T303_07955	cell division protein FtsK	Chromosome:1474445-1476860	2415	667.224	564.456	212.604	599.677	183.014	206.799
T303_07960	ferredoxin--NADP reductase	Chromosome:1477012-1478011	999	310.897	245.435	377.888	318.669	528.018	498.706
T303_07965	tRNA (guanine-N1)-methyltransferase	Chromosome:1478012-1479240	1228	307.235	217.567	328.141	292.486	424.958	361.803
T303_07970	16S rRNA-processing protein RimM	Chromosome:1478012-1479240	1228	293.297	212.668	301.539	275.481	381.64	286.353
T303_07975	tRNA-Glu	Chromosome:1479455-1479527	72	0	0	0	0	0	0
T303_07980	tRNA-Gln	Chromosome:1479556-1479628	72	0	0	0	0	0	0
T303_07985	response regulator	Chromosome:1479911-1482251	2340	79.6738	51.5167	299.227	123.398	374.248	492.902
T303_07990	sensor kinase	Chromosome:1479911-1482251	2340	41.3612	29.2451	226.605	72.6768	270.027	300.341
T303_07995	transporter	Chromosome:1479911-1482251	2340	24.781	19.6461	213.691	58.4744	229.716	233.597
T303_08000	hypothetical protein	Chromosome:1482505-1482673	168	2.61987	7.73692	23.7878	33.2623	50.2094	93.9434
T303_08005	serine/threonine protein kinase	Chromosome:1483310-1488210	4900	131.086	81.6557	485.085	200.866	619.336	487.919
T303_08010	protein phosphatase	Chromosome:1483310-1488210	4900	167.453	123.178	529.667	259.95	674.565	596.771
T303_08015	16S rRNA methyltransferase	Chromosome:1483310-1488210	4900	107.418	102.736	133.299	149.409	191.924	189.129
T303_08020	methionyl-tRNA formyltransferase	Chromosome:1483310-1488210	4900	110.37	133.232	116.691	183.755	170.461	180.268
T303_08025	primosome assembly protein PriA	Chromosome:1488227-1490624	2397	103.189	146.114	98.6552	181.85	144.076	160.111
T303_08030	DNA-directed RNA polymerase subunit omega	Chromosome:1490765-1491080	315	875.528	1695.07	941.49	2005.75	1289.24	7284.1
T303_08035	guanylate kinase	Chromosome:1491101-1491731	630	338.622	571.287	477.863	721.955	595.01	1813.14
T303_08040	cell division protein FtsY	Chromosome:1491956-1493348	1392	280.094	149.194	330.115	217.598	338.135	288.746
T303_08045	haloacid dehalogenase	Chromosome:1493361-1494964	1603	163.609	103.433	196.729	137.579	184.713	159.038
T303_08050	HAD family hydrolase	Chromosome:1493361-1494964	1603	123.25	83.4015	166.092	114.744	139.721	100.851
T303_08055	GntR family transcriptional regulator	Chromosome:1495148-1495526	378	1642.98	3339.25	1262.02	3656.67	1174.88	6786.49
T303_08060	multidrug ABC transporter ATP-binding protein	Chromosome:1495530-1496229	699	1911.6	2280.59	1092.66	2800.8	1064.33	4116.4
T303_08065	ABC transporter permease	Chromosome:1496234-1497026	792	2770.49	3314.72	1303.33	3609.13	1353.09	2561.09
T303_08070	peptide ABC transporter ATP-binding protein	Chromosome:1497075-1499083	2008	226.728	201.134	359.53	364.748	627.935	376.985
T303_08075	peptide ABC transporter ATP-binding protein	Chromosome:1497075-1499083	2008	191.215	172.253	339.482	323.189	603.452	330.387
T303_08080	peptide ABC transporter permease	Chromosome:1499092-1501512	2420	123.984	100.151	211.898	190.398	376.288	190.089
T303_08085	peptide ABC transporter permease	Chromosome:1499092-1501512	2420	62.624	57.4063	207.509	133.09	367.543	157.506
T303_08090	peptide ABC transporter ATP-binding protein	Chromosome:1501573-1503541	1968	25.2499	27.9578	154.314	82.6942	270.583	103.812
T303_08095	transposase IS1193	Chromosome:1503896-1505081	1185	58.7596	88.5968	50.5083	91.7982	55.6834	57.2452
T303_08100	peptide ABC transporter ATP-binding protein	Chromosome:1505118-1507092	1974	439.691	350.503	666.132	781.219	767.012	1873.26
T303_08105	transposase	Chromosome:1507396-1507687	291	7.07108	5.88891	14.6814	14.5371	17.692	16.5885
T303_08110	transposase IS904	Chromosome:1507704-1508544	840	39.2329	45.7798	52.1594	50.898	63.8965	107.968
T303_08120	hydrolase, amidohydrolase superfamily	Chromosome:1509264-1509516	252	44.3779	47.0996	75.5991	49.2738	97.1223	123.564
T303_08125	permease of the major facilitator superfamily	Chromosome:1509861-1511067	1206	47.6032	56.7637	292.345	128.867	285.034	264.798
T303_08130	transposase	Chromosome:1511112-1511655	543	16.3007	16.1856	110.34	27.47	132.202	81.5419
T303_08140	eutD; phosphotransacetylase	Chromosome:1512550-1513534	984	240.616	490.511	399.981	370.318	366.501	2711.31
T303_08145	23S rRNA pseudouridine synthase	Chromosome:1513547-1515917	2370	86.2974	105.422	237.781	130.131	252.486	196.751
T303_08150	ATP-NAD kinase	Chromosome:1513547-1515917	2370	64.8272	71.5627	234.915	105.025	246.426	162.069
T303_08155	GTP pyrophosphokinase	Chromosome:1513547-1515917	2370	41.4373	43.7112	214.02	71.8843	213.472	116.664
T303_08160	adenylate cyclase	Chromosome:1515937-1516594	657	24.2648	27.799	189.848	79.3906	304.269	366.788
T303_08165	ribose-phosphate pyrophosphokinase	Chromosome:1516913-1517927	1014	196.724	121.399	735.351	335.115	736.157	301.759
T303_08170	cysteine desulfurase	Chromosome:1517930-1519043	1113	264.263	130.106	759.305	345.241	765.593	340.843
T303_08175	cysteine desulfurase	Chromosome:1519044-1519392	348	338.906	167.022	847.67	392.817	862.104	379.73
T303_08180	redox-sensing transcriptional repressor Rex	Chromosome:1519499-1520883	1384	92.4582	105.417	86.3558	179.404	117.268	334.218
T303_08185	gamma-glutamyl hydrolase	Chromosome:1519499-1520883	1384	168.544	219.597	145.614	357.459	183.965	381.304
T303_08190	DNA repair protein RadC	Chromosome:1520935-1521622	687	8.85379	3.70963	13.0529	7.93713	17.1103	14.6591
T303_08195	alpha-L-Rha alpha-1,3-L-rhamnosyltransferase	Chromosome:1521670-1524519	2849	166.922	65.5013	564.382	169.779	559.127	342.593
T303_08200	glycosyl transferase	Chromosome:1521670-1524519	2849	139.506	71.1083	372.126	167.081	353.398	221.824
T303_08205	polysaccharide ABC exporter ATP-binding protein	Chromosome:1524538-1528656	4118	231.261	159.297	565.917	301.584	541.264	335.299
T303_08210	polysaccharide ABC exporter membrane-spanning protein	Chromosome:1524538-1528656	4118	204.417	159.111	494.338	297.95	465.71	311.662
T303_08215	rhamnosyl transferase	Chromosome:1524538-1528656	4118	208.765	200.207	470.1	330.481	441.557	303.077
T303_08220	rhamnosyl transferase	Chromosome:1524538-1528656	4118	164.78	182.856	399.875	272.12	346.411	214.502
T303_08225	beta-carotene 15,15'-monooxygenase	Chromosome:1528744-1530286	1542	37.7371	14.6576	201.014	47.839	207.28	78.408
T303_08230	glycosyl transferase	Chromosome:1530292-1532902	2610	21.0434	10.1873	126.296	31.7548	143.918	31.1413
T303_08235	polysaccharide biosynthesis protein transporter	Chromosome:1530292-1532902	2610	53.2272	38.8431	273.486	92.0665	266.574	75.4475
T303_08240	glycosyl transferase	Chromosome:1530292-1532902	2610	23.8585	12.5541	154.316	34.1511	162.115	29.1324
T303_08245	glycosyl transferase	Chromosome:1532907-1533597	690	47.8698	39.578	321.878	97.7564	304.464	78.2489
T303_08250	dTDP-4-dehydrorhamnose reductase	Chromosome:1533679-1534567	888	42.6226	32.0112	519.243	99.6749	403.873	98.0628
T303_08255	transporter	Chromosome:1534607-1535954	1347	4.36458	2.82875	67.7075	11.1601	56.5862	26.0542
T303_08260	glycosyl transferase	Chromosome:1536054-1536981	927	156.903	184.32	482.855	350.096	661.783	773.207
T303_08265	aromatic ring hydroxylating protein	Chromosome:1536990-1537356	366	213.497	298.283	576.697	508.762	744.864	849.07
T303_08270	RNA polymerase sigma factor RpoD	Chromosome:1537379-1538489	1110	204.943	285.075	567.794	516.578	754.055	774.094
T303_08275	DNA primase	Chromosome:1538492-1540304	1812	212.996	260.609	473.223	531.983	570.565	511.989
T303_08280	histidine kinase	Chromosome:1540401-1540527	126	0	0	9.83581	0	0	17.2414
T303_08285	30S ribosomal protein S21	Chromosome:1540686-1540863	177	521.731	142.228	4803.75	398.468	5495.69	766.624
T303_08290	amino acid ABC transporter substrate-binding protein	Chromosome:1541056-1541851	795	159.787	177.965	407.879	269.131	590.539	898.182
T303_08295	aminotransferase	Chromosome:1541912-1543022	1110	129.355	193.888	66.91	271.531	126.604	595.64
T303_08300	amino acid ABC transporter substrate-binding protein	Chromosome:1543369-1545000	1631	9.67607	9.58492	34.2294	18.5125	190.78	13.2601
T303_08305	amino acid ABC transporter substrate-binding protein	Chromosome:1543369-1545000	1631	8.22348	9.98648	63.9656	14.5938	243.835	9.05454
T303_08310	NUDIX hydrolase	Chromosome:1545207-1545672	465	536.262	371.33	201.808	523.781	267.137	463.841
T303_08315	excinuclease ABC subunit B	Chromosome:1545716-1547723	2007	427.263	344.553	148.115	546.768	208.078	358.145
T303_08320	hypothetical protein	Chromosome:1547854-1548322	468	240.646	194.145	89.0624	295.159	131.977	194.783
T303_08325	hypothetical protein	Chromosome:1548467-1548818	351	28.533	26.2102	83.1469	63.8585	211.239	367.48
T303_08330	hypothetical protein	Chromosome:1549049-1549331	282	23.5847	20.214	63.1416	50.5053	117.108	221.289
T303_08335	amino acid ABC transporter permease	Chromosome:1549529-1552480	2951	147.289	145.323	773.329	277.602	795.694	441.368
T303_08340	peptide ABC transporter ATP-binding protein	Chromosome:1549529-1552480	2951	380.667	428.454	1106.11	825.898	1214.32	970.127
T303_08345	GTPase	Chromosome:1552551-1552749	198	601.52	1273.79	934.772	1323.01	1225.12	682.157
T303_08350	obgE; GTPase CgtA	Chromosome:1552915-1554229	1314	169.814	332.043	352.625	325.029	426.448	205.804
T303_08355	hypothetical protein	Chromosome:1554322-1554451	129	14.5089	66.9346	87.3581	166.831	219.951	297.098
T303_08360	16S pseudouridylate synthase	Chromosome:1554532-1555264	732	32.0749	41.79	99.2652	81.2935	168.482	124.989
T303_08365	hypothetical protein	Chromosome:1555264-1555498	234	51.1884	58.6636	141.913	121	233.448	170.609
T303_08370	hypothetical protein	Chromosome:1555633-1556077	444	53.7799	59.9412	134.778	108.867	219.705	143.018
T303_08375	thioesterase	Chromosome:1556107-1556572	465	52.0558	63.1628	106.168	106.372	160.125	111.363
T303_08380	salt-stress induced protein	Chromosome:1556652-1556865	213	49.2159	41.8778	135.11	91.399	194.221	148.884
T303_08385	hypothetical protein	Chromosome:1557179-1557422	243	24.1943	13.5156	80.2128	47.599	84.7884	39.6418
T303_08390	drug/metabolite transporter permease	Chromosome:1557589-1558480	891	729.491	1329.13	172.022	1259.4	181.347	1665.47
T303_08395	membrane protein	Chromosome:1558517-1558769	252	377.76	127.827	496.465	300.207	426.879	342.308
T303_08400	CRISPR-associated protein Csn2	Chromosome:1559989-1566015	6026	13.033	9.07078	121.288	23.9454	115.096	84.4829
T303_08405	CRISPR-associated protein Cas2	Chromosome:1559989-1566015	6026	30.8466	31.62	251.685	59.1835	212.304	224.616
T303_08410	CRISPR-associated protein Cas1	Chromosome:1559989-1566015	6026	21.5554	20.7747	169.674	37.5953	139.069	109.763
T303_08415	CRISPR-associated protein Csn1	Chromosome:1559989-1566015	6026	16.6806	12.3627	149.618	25.7526	117.23	37.5633
T303_08420	phosphoserine phosphatase	Chromosome:1566346-1566994	648	659.857	1262.19	101.954	500.716	111.754	164.397
T303_08425	septation ring formation regulator EzrA	Chromosome:1567105-1568830	1725	1203.46	2175.14	930.064	2181.57	996.326	1006.91
T303_08430	gyrB; DNA gyrase subunit B	Chromosome:1568926-1570879	1953	1358.1	1977.95	773.766	2095.04	613.065	564.976
T303_08435	P-Ser-HPr phosphatase	Chromosome:1570879-1571485	606	523.035	471.42	525.49	563.503	404.501	204.155
T303_08440	membrane protein	Chromosome:1571525-1572588	1063	373.025	284.907	583.274	461.521	462.817	455.943
T303_08445	murein hydrolase regulator LrgA	Chromosome:1571525-1572588	1063	252.486	179.682	399.045	326.35	298.05	209.29
T303_08450	tRNA-Thr	Chromosome:1572739-1572810	71	0	0	0	0	0	0
T303_08455	arsenate reductase	Chromosome:1572867-1573221	354	81.1897	62.274	191.645	94.3893	209.07	234.596
T303_08460	methylated-DNA-protein-cysteine methyltransferase	Chromosome:1573255-1573594	339	17.1177	15.8729	193.309	54.9413	191.073	197.792
T303_08465	3-phosphoglycerate dehydrogenase	Chromosome:1573806-1574985	1179	31.6055	30.5837	533.526	115.275	414.721	341.925
T303_08470	GNAT family acetyltransferase	Chromosome:1575003-1575561	558	23.254	25.1211	495.429	102.012	359.293	245.143
T303_08475	phosphoserine aminotransferase	Chromosome:1575572-1576667	1095	17.7529	19.6065	491.278	71.7758	294.968	153.956
T303_08485	lactoylglutathione lyase	Chromosome:1577769-1578165	396	2688.7	3844.44	1966.33	4888.54	1038.23	5772.37
T303_08495	spermidine/putrescine ABC transporter substrate-binding protein	Chromosome:1579301-1583070	3769	157.91	118.826	322.714	189.102	484.718	238.199
T303_08500	spermidine/purescine ABC transporter permease	Chromosome:1579301-1583070	3769	143.152	112.521	279.143	177.44	417.09	203.058
T303_08505	spermidine/putrescine ABC transporter permease	Chromosome:1579301-1583070	3769	149.913	122.819	278.045	184.959	440.827	196.312
T303_08510	spermidine/putrescine ABC transporter ATP-binding protein	Chromosome:1579301-1583070	3769	139.469	125.025	247.145	178.218	386.479	184.028
T303_08515	murB; UDP-N-acetylenolpyruvoylglucosamine reductase	Chromosome:1583114-1584029	915	106.752	118.68	151.632	139.244	251.419	146.538
T303_08520	2-amino-4-hydroxy-6-hydroxymethyldihydropteridine pyrophosphokinase	Chromosome:1584205-1585053	848	356.119	181.092	295.648	237.763	306.078	174.568
T303_08525	dihydroneopterin aldolase	Chromosome:1584205-1585053	848	284.499	185.201	190.807	239.761	196.693	165.648
T303_08530	alpha-amylase	Chromosome:1585249-1586725	1476	471.748	454.195	1025.36	829.734	798.578	1549.13
T303_08535	dihydropteroate synthase	Chromosome:1586756-1587557	801	304.566	131.916	512.555	282.905	470.312	236.27
T303_08540	GTP cyclohydrolase I	Chromosome:1587605-1588169	564	231.199	119.857	401.971	222.693	356.212	159.06
T303_08545	amino acid specific permease	Chromosome:1588314-1590159	1845	263.401	184.132	701.301	332.487	425.532	423.483
T303_08550	dihydrofolate synthase	Chromosome:1590222-1591485	1263	113.687	199.124	107.679	170.549	152.779	111.229
T303_08555	RNA-binding protein	Chromosome:1591639-1591888	249	4489.61	10521.6	4304.93	8582.22	5561.59	2654.86
T303_08560	rpsP; 30S ribosomal protein S16	Chromosome:1591899-1592172	273	2081.09	6106.8	1828.59	4678	2437.1	1411.26
T303_08565	tellurite resistance protein TehB	Chromosome:1592603-1593482	879	95.9134	71.83	80.06	111.417	97.0263	102.062
T303_08575	hypothetical protein	Chromosome:1593951-1594110	159	688.7	350.416	80.9967	320.36	97.623	248.607
T303_08580	exodeoxyribonuclease	Chromosome:1594640-1595468	828	84.7944	67.8714	90.7692	120.815	155.976	205.137
T303_08585	citrulline cluster-linked protein	Chromosome:1595541-1596021	480	38.9606	62.0037	30.4151	81.288	83.7266	124.656
T303_08595	lipid kinase	Chromosome:1596970-1597984	1014	308.292	193.094	390.788	374.341	313.408	348.742
T303_08600	DNA ligase LigA	Chromosome:1597993-1599952	1959	333.542	238.83	414.317	445.538	330.507	269.888
T303_08605	queuosine transporter QueT	Chromosome:1600002-1600524	522	78.7275	37.3585	221.204	96.4437	271.299	232.444
T303_08610	tRNA-processing ribonuclease BN	Chromosome:1600618-1601551	933	706.814	1509.79	360.924	1628.21	452.423	924.183
T303_08615	methionine aminopeptidase	Chromosome:1601570-1602431	861	358.24	613.026	351.234	710.751	449.173	549.671
T303_08620	transcriptional regulator containing CBS domains	Chromosome:1602474-1604335	1861	197.147	224.461	321.01	339.266	408.66	405.961
T303_08625	GNAT family acetyltransferase	Chromosome:1602474-1604335	1861	184.038	175.05	331.008	295.458	390.45	305.502
T303_08630	UDP-N-acetylglucosamine 1-carboxyvinyltransferase	Chromosome:1604358-1605621	1263	21.1698	25.8847	310.615	84.5049	546.622	402.33
T303_08635	competence protein ComEC	Chromosome:1605706-1608632	2926	2.04793	1.41689	1.82953	3.31699	4.88263	6.59818
T303_08640	late competence protein required for DNA binding and uptake	Chromosome:1605706-1608632	2926	4.84216	4.09791	8.28343	8.99368	16.2302	20.6954
T303_08645	1-acyl-sn-glycerol-3-phosphate acyltransferase	Chromosome:1608739-1609495	756	15.5023	16.2532	103.623	45.1284	168.294	130.97
T303_08650	deacetylase	Chromosome:1609694-1610561	867	156.884	89.9356	134.551	241.492	294.06	267.394
T303_08655	methyltransferase	Chromosome:1610610-1611375	765	100.177	174.189	74.9798	182.67	109.74	129.774
T303_08660	hypothetical protein	Chromosome:1611378-1611648	270	174.35	377.712	108.03	352.494	171.295	221.901
T303_08665	RNA helicase	Chromosome:1612203-1613787	1584	180.447	117.877	1745.73	258.963	1979.06	714.396
T303_08670	magnesium transporter	Chromosome:1613977-1614886	909	185.293	125.259	240.051	205.716	244.096	379.196
T303_08675	helicase	Chromosome:1614899-1615280	381	189.532	135.157	285.113	270.32	294.885	386.614
T303_08680	proton-coupled thiamine transporter YuaJ	Chromosome:1615580-1616156	576	965.277	1084.79	1056.65	914.316	438.829	704.602
T303_08685	MutR family transcriptional regulator	Chromosome:1616606-1617470	864	68.0621	17.2395	27.6479	21.1756	26.6154	27.8343
T303_08690	permease of the major facilitator superfamily	Chromosome:1617586-1618765	1179	76.6846	17.9709	23.4989	20.8687	28.8132	38.6136
T303_08695	peptide chain release factor 3	Chromosome:1619134-1620679	1545	74.0633	68.9319	462.184	144.74	637.309	351.195
T303_08700	hypothetical protein	Chromosome:1621028-1621694	666	35.1527	33.3111	115.235	59.6494	181.866	152.326
T303_08705	UDP-N-acetylmuramoyl-tripeptide--D-alanyl-D-alanine ligase	Chromosome:1621782-1623156	1374	70.1872	58.2075	285.094	111.019	233.985	144.176
T303_08720	amino acid ABC transporter substrate-binding protein	Chromosome:1624737-1625592	855	16.3426	16.0972	117.903	28.5309	115.716	56.5416
T303_08725	glutamine ABC transporter ATP-binding protein	Chromosome:1625634-1627712	2078	13.2332	13.0049	81.9735	22.3131	77.4183	41.3515
T303_08730	amino acid ABC transporter permease	Chromosome:1625634-1627712	2078	11.4747	11.3497	69.7537	19.5368	61.2242	26.9229
T303_08735	polar amino acid ABC transporter permease	Chromosome:1625634-1627712	2078	10.4376	8.45283	45.8859	13.1489	41.765	19.7794
T303_08740	D-alanine--D-alanine ligase	Chromosome:1628153-1629200	1047	132.117	217.929	449.563	320.791	464.319	413.069
T303_08745	copper-binding protein	Chromosome:1629360-1629564	204	173.682	155.229	23.7465	214.625	84.6378	235.567
T303_08750	ActP protein	Chromosome:1629637-1631866	2229	308.588	579.965	39.4415	811.535	134.001	395.179
T303_08755	uracil phosphoribosyltransferase	Chromosome:1631869-1632301	432	329.771	774.968	33.1135	869.358	97.9301	267.857
T303_08760	tryptophan synthase subunit alpha	Chromosome:1632445-1633228	783	50.8215	58.3399	260.016	85.5918	526.035	108.45
T303_08765	tryptophan synthase subunit beta	Chromosome:1633231-1636773	3542	49.0468	58.5859	205.906	95.3299	428.432	121.312
T303_08770	N-(5'-phosphoribosyl)anthranilate isomerase	Chromosome:1633231-1636773	3542	52.028	70.6487	211.553	106.186	460.064	173.321
T303_08775	indole-3-glycerol-phosphate synthase	Chromosome:1633231-1636773	3542	63.1712	71.8502	237.477	133.098	515.996	184.071
T303_08780	anthranilate phosphoribosyltransferase	Chromosome:1633231-1636773	3542	62.4946	71.2582	272.363	146.817	603.306	176.088
T303_08785	anthranilate synthase subunit II	Chromosome:1636863-1638797	1934	56.7876	75.1061	324.561	162.732	726.457	177.505
T303_08790	anthranilate synthase subunit I	Chromosome:1636863-1638797	1934	42.4749	54.802	324.642	131.87	700.842	151.583
T303_08795	chorismate mutase	Chromosome:1638858-1639149	291	29.707	42.8917	291.19	85.1097	586.206	92.114
T303_08800	dihydroorotate dehydrogenase	Chromosome:1639734-1640085	351	681.568	424.879	568.231	565.168	494.629	563.242
T303_08805	ATPase	Chromosome:1640166-1642554	2388	811.998	585.874	725.068	743.623	617.893	530.652
T303_08810	hypothetical protein	Chromosome:1642787-1643183	396	2.42797	1.2616	2.73779	4.46398	5.32969	5.96626
T303_08815	hypothetical protein	Chromosome:1643491-1643791	300	974.062	1014.79	1604.09	1902.43	845.574	1316.51
T303_08825	MerR family transcriptional regulator	Chromosome:1644344-1645073	729	153.873	149.749	60.4204	154.075	125.263	185.059
T303_08830	DNA polymerase III subunit epsilon	Chromosome:1645247-1645838	591	179.901	216.048	74.9077	218.592	134.367	164.606
T303_08835	hypothetical protein	Chromosome:1645887-1646424	537	392.339	238.341	384.723	388.478	621.044	858.411
T303_08840	metal-sulfur cluster biosynthetic enzyme	Chromosome:1646935-1647295	360	55.3572	75.6338	115.721	172.239	220.612	372.73
T303_08845	dihydroxy-acid dehydratase	Chromosome:1647442-1649161	1719	83.7672	92.889	589.836	204.105	509.34	260.213
T303_08850	pyridine nucleotide-disulfide oxidoreductase	Chromosome:1649273-1650455	1182	192.091	483.081	39.4571	442.703	80.0404	111.431
T303_08855	tRNA-Ser	Chromosome:1650544-1650631	87	0	0	0	0	0	0
T303_08860	tRNA (guanine-N(7)-)-methyltransferase	Chromosome:1650690-1651332	642	271.963	262.921	672.16	359.453	953.412	582.499
T303_08865	aminoglycoside phosphotransferase	Chromosome:1651341-1652133	792	380.457	381.7	449.159	601.336	595.96	515.271
T303_08870	ABC-type exoprotein transport system, permease component	Chromosome:1652190-1653956	1766	72.9648	51.3524	244.797	123.107	215.098	116.439
T303_08875	multidrug ABC transporter ATP-binding protein	Chromosome:1652190-1653956	1766	91.4124	93.7809	223.912	199.289	195.481	112.468
T303_08880	histidine triad protein	Chromosome:1654020-1654745	725	739.665	1525.14	293.135	1967.51	262.92	569.728
T303_08885	hypothetical protein	Chromosome:1654020-1654745	725	1343.3	1971.95	530.141	2817.38	478.128	926.835
T303_08890	hypothetical protein	Chromosome:1654786-1655518	732	39.1511	143.981	100.321	146.784	124.291	108.405
T303_08895	phosphoribosylglycinamide synthetase	Chromosome:1655536-1656172	636	15.1347	71.1113	41.8589	76.2682	57.9607	25.2549
T303_08900	hypothetical protein	Chromosome:1656190-1656316	126	18.8488	356.861	112.004	257.613	207.643	0
T303_08905	ATP-dependent Clp protease ATP-binding protein	Chromosome:1656733-1658833	2100	0	0	2195.31	0	941.316	0
T303_08910	hypothetical protein	Chromosome:1659548-1660640	1092	370.162	99.0723	157.822	169.976	202.1	258.755
T303_08915	SAM-dependent methyltransferase	Chromosome:1660646-1661516	870	287.218	100.377	110.552	169.688	141.523	181.523
T303_08920	Iojap family protein	Chromosome:1661711-1662065	354	804.219	400.658	848.781	753.971	949.346	1465.78
T303_08925	hypothetical protein	Chromosome:1662088-1663308	1220	405.839	213.512	411.089	394.734	427.118	649.611
T303_08930	nadD; nicotinic acid mononucleotide adenylyltransferase	Chromosome:1662088-1663308	1220	465.965	253.605	493.76	477.212	512.942	696.332
T303_08935	RNA-binding protein	Chromosome:1663411-1663729	318	423.141	253.803	505.747	441.798	512.15	594.515
T303_08940	GTPase	Chromosome:1663967-1665613	1646	337.739	168.864	445.966	349.973	443.08	403.711
T303_08945	HAD family hydrolase	Chromosome:1663967-1665613	1646	316.649	178.323	473.85	369.614	492.228	377.097
T303_08950	multidrug DMT transporter permease	Chromosome:1665749-1666664	915	102.822	56.9598	241.808	149.28	316.633	159.716
T303_08955	hypothetical protein	Chromosome:1666740-1667079	339	6.6304	3.88675	10.5032	10.4317	18.3918	20.5801
T303_08960	aspartyl/glutamyl-tRNA amidotransferase subunit B	Chromosome:1667221-1670432	3211	432.359	391.732	705.146	563.875	619.504	304.905
T303_08965	gatA; aspartyl/glutamyl-tRNA amidotransferase subunit A	Chromosome:1667221-1670432	3211	286.741	314.866	478.667	454.05	395.818	187.678
T303_08970	glutamyl-tRNA amidotransferase subunit C	Chromosome:1667221-1670432	3211	335.574	391.874	629.154	540.343	511.564	199.291
T303_08975	glycosyltransferase	Chromosome:1670571-1670826	255	13.1673	14.1548	10.1445	35.5249	17.336	42.3923
T303_08980	6-phospho-beta-glucosidase	Chromosome:1671363-1672692	1329	118.864	79.9806	27.1227	134.032	25.0797	92.2686
T303_08985	hypothetical protein	Chromosome:1672703-1672805	102	0	0	655.119	5304.53	0	0
T303_08990	methionine sulfoxide reductase A	Chromosome:1672957-1674330	1373	496.941	225.414	67.8419	154	73.9224	140.782
T303_08995	O-sialoglycoprotein endopeptidase	Chromosome:1672957-1674330	1373	433.739	194.526	49.8571	132.392	54.1403	140.774
T303_09000	isochorismatase	Chromosome:1674450-1675002	552	955.977	490.427	82.6312	371.458	138.435	426.512
T303_09005	GTP-sensing transcriptional pleiotropic repressor codY	Chromosome:1675064-1675850	786	1496.05	2221.25	515.668	3574.43	536.526	4940.02
T303_09010	aminotransferase AlaT	Chromosome:1676109-1677324	1215	220.148	173.193	1284.94	396.693	893.8	540.145
T303_09015	universal stress protein UspA	Chromosome:1677678-1678131	453	12820.4	17217.9	1364.08	28390	723.474	8893.88
T303_09025	hypothetical protein	Chromosome:1678953-1679127	174	16.4486	24.6799	21.5899	14.5076	27.9157	49.0722
T303_09030	membrane protein	Chromosome:1679187-1679568	381	9.97897	9.69589	6.64423	7.10204	11.4713	7.60968
T303_09035	pyruvate formate lyase-activating protein	Chromosome:1679773-1680574	801	634.11	169.464	379.724	425.24	264.345	199.961
T303_09040	putative transport protein	Chromosome:1681569-1682901	1332	27.8459	24.3436	678.197	72.0169	696.596	237.445
T303_09045	molybdenum ABC transporter ATP-binding protein	Chromosome:1683014-1683797	783	23.0357	14.7144	82.6543	38.2827	103.716	64.9471
T303_09050	sodium:hydrogen antiporter	Chromosome:1684418-1686485	2067	415.253	323.603	361.977	464.142	325.67	281.801
T303_09055	hypothetical protein	Chromosome:1686493-1688222	1729	591.309	506.363	387.099	779.207	336.127	286.896
T303_09060	SAM-dependent methyltransferase	Chromosome:1686493-1688222	1729	505.625	523.952	350.125	744.111	295.161	334.806
T303_09065	Fe-S oxidoreductase	Chromosome:1686493-1688222	1729	569.233	614.865	371.886	909.103	307.008	307.991
T303_09070	peptidase S16	Chromosome:1688306-1689858	1552	1041.11	885.51	880.995	1287.56	1102.97	3167.04
T303_09075	phosphopantetheine adenylyltransferase	Chromosome:1688306-1689858	1552	1044.96	1017.68	896.433	1437.04	1044.18	2777.39
T303_09080	rRNA methyltransferase	Chromosome:1689891-1690440	549	1005.17	1049.42	914.595	1474.76	944.966	2489.69
T303_09085	thioredoxin reductase	Chromosome:1690581-1691502	921	967.124	1117.1	810.076	1532.84	769.737	1997.56
T303_09090	thioredoxin	Chromosome:1691567-1691792	225	242.544	357.717	136.255	402.922	205.319	277.208
T303_09095	amino acid ABC transporter ATP-binding protein	Chromosome:1692006-1693673	1667	86.8768	62.0005	397.864	127.218	625.473	425.617
T303_09100	amino acid ABC transporter permease	Chromosome:1692006-1693673	1667	83.2181	64.7523	357.516	136.416	537.546	416.699
T303_09105	amino acid ABC transporter substrate-binding protein	Chromosome:1693883-1694738	855	340.898	281.429	2013.18	748.693	1820.29	1642.21
T303_09110	hypothetical protein	Chromosome:1695173-1695407	234	49.7135	40.0276	83.3041	90.678	146.963	149.941
T303_09115	DNA polymerase IV	Chromosome:1695704-1696808	1104	23.8636	20.676	48.0811	52.1876	85.0982	73.6804
T303_09120	formate acetyltransferase	Chromosome:1697086-1699396	2310	1621.03	6842.33	465.913	6376.11	664.016	12692.1
T303_09125	carbonate dehydratase	Chromosome:1699662-1700445	783	45.219	57.3916	48.2759	64.1088	89.3247	159.806
T303_09130	GNAT family acetyltransferase	Chromosome:1700462-1700948	486	105.582	116.514	82.5058	162.143	173.145	339.282
T303_09135	type I restriction endonuclease subunit S	Chromosome:1701298-1701604	306	31.9541	65.9113	59.9554	70.2726	91.6089	99.283
T303_09140	hypothetical protein	Chromosome:1701651-1702137	486	24.0519	53.5309	40.4489	67.1381	64.0802	73.9091
T303_09145	ABC transporter permease	Chromosome:1702581-1703984	1403	139.162	152.375	165.153	194.734	242.055	281.811
T303_09150	putrescine/spermidine ABC transporter ATP-binding protein	Chromosome:1702581-1703984	1403	136.594	162.349	166.648	197.379	236.216	248.155
T303_09160	beta-lactamase	Chromosome:1704186-1705946	1760	95.1897	144.438	140.501	153.337	173.96	161.86
T303_09165	C3-degrading proteinase	Chromosome:1704186-1705946	1760	124.274	161.611	254.545	211.926	284.286	289.721
T303_09170	CAAX amino terminal protease	Chromosome:1706068-1706542	474	13.8813	9.35058	10.4729	9.67647	23.7933	32.9012
T303_09175	glycerol uptake permease	Chromosome:1706628-1707492	864	312.074	190.11	1694.27	444.431	2400.93	411.414
T303_09180	X-prolyl-dipeptidyl aminopeptidase	Chromosome:1707612-1709880	2268	1798.76	2170.97	797.941	2018.87	775.177	808.306
T303_09185	putative bacteriocin self-immunity protein	Chromosome:1709959-1710340	381	154.93	203.579	36.3003	224.88	52.6695	79.3258
T303_09195	peptidase	Chromosome:1711049-1711406	357	301.747	577.158	67.2337	625.642	86.0204	105.622
T303_09205	transposase IS3	Chromosome:1712576-1713317	741	0.203981	0	0.0184999	0	0	0
T303_09210	transposase IS3	Chromosome:1713331-1714201	870	0	0	0	0	0	0
T303_09220	pore-forming peptide bacteriocin	Chromosome:1714346-1714601	255	47.3444	53.1797	21.8855	54.0776	30.6365	66.2513
T303_09225	hypothetical protein	Chromosome:1714851-1715253	402	32.0415	35.1447	13.6655	41.1225	15.0226	39.6474
T303_09230	membrane protein	Chromosome:1715582-1715750	168	26.5957	25.2236	19.8015	33.9545	20.7634	65.9963
T303_09235	membrane protein	Chromosome:1715846-1716062	216	716.227	1019.95	345.807	1204.79	400.37	2393.05
T303_09240	hypothetical protein	Chromosome:1716107-1716251	144	121.422	123.482	45.2756	304.093	59.9018	368.327
T303_09245	bacteriocin	Chromosome:1716257-1716488	231	421.311	805.407	214.49	929.66	240.765	1749.78
T303_09250	bacteriocin BlpI family protein	Chromosome:1716843-1717044	201	10.1515	5.42691	7.70367	12.4903	12.0136	25.4203
T303_09255	bacteriocin	Chromosome:1717062-1717239	177	18.6223	10.543	17.9898	2.10708	17.6379	24.8355
T303_09260	response regulator-like protein	Chromosome:1717493-1719565	2072	31.9752	23.5614	38.7579	54.463	37.5381	32.8695
T303_09265	sensor histidine kinase	Chromosome:1717493-1719565	2072	14.6234	6.74728	38.7884	26.5205	43.3812	33.1299
T303_09270	signal peptidase	Chromosome:1719582-1719744	162	8.12874	7.00957	9.21339	3.9478	19.727	7.40971
T303_09275	lactococcin A ABC transporter permease	Chromosome:1719758-1721126	1368	2.85817	3.48003	4.22225	4.90478	5.76103	6.13231
T303_09285	hypothetical protein	Chromosome:1723334-1723490	156	10.2525	0	2.92856	0	0	7.46135
T303_09290	hypothetical protein	Chromosome:1723890-1724034	144	3.45858	13.1125	2.55679	24.1607	0	10.9771
T303_09295	multidrug ABC transporter ATP-binding protein	Chromosome:1724307-1727803	3496	41.0292	62.5846	63.5496	110.145	205.428	333.714
T303_09300	multidrug ABC transporter ATP-binding protein	Chromosome:1724307-1727803	3496	39.6236	51.4466	52.1459	92.9656	158.475	250.206
T303_09310	glycopeptide antibiotics resistance protein	Chromosome:1728401-1728929	528	169.281	109.17	424.994	223.769	582.541	505.42
T303_09315	23S rRNA methyltransferase	Chromosome:1728930-1730100	1170	192.991	122.864	389.843	244.596	509.134	395.381
T303_09320	transcriptional regulator	Chromosome:1730103-1730826	723	223.766	109.663	440.008	244.812	559.905	332.303
T303_09325	phosphoesterase	Chromosome:1730880-1732281	1401	191.949	108.886	117.751	141.016	88.1463	52.4161
T303_09335	DEAD/DEAH box helicase	Chromosome:1733083-1734427	1344	176.075	228.34	293.199	319.006	363.02	406.563
T303_09340	phospho-N-acetylmuramoyl-pentapeptide-transferase	Chromosome:1734501-1735524	1023	221.947	352.265	601.513	515.796	692.7	661.658
T303_09345	penicillin-binding protein 2X	Chromosome:1735525-1737793	2268	133.854	182.163	480.924	319.586	577.01	428.259
T303_09350	cell division protein FtsL	Chromosome:1737796-1738117	321	239.79	225.493	331.137	302.984	395.303	243.525
T303_09355	16S rRNA methyltransferase	Chromosome:1738119-1739070	951	170.298	159.557	366.671	225.319	424.068	174.062
T303_09365	hypothetical protein	Chromosome:1740310-1740559	249	96.3112	90.9979	21.5931	100.351	41.6247	82.7549
T303_09370	hypothetical protein	Chromosome:1740864-1741221	357	102.563	119.242	14.0092	121.224	32.1305	92.8556
T303_09375	membrane protein	Chromosome:1741440-1741743	303	0.684894	1.86742	1.42344	2.00512	6.4712	6.19022
T303_09380	proA; gamma-glutamyl phosphate reductase	Chromosome:1742064-1743315	1251	81.6826	94.1023	226.37	137.759	297.446	220.516
T303_09385	gamma-glutamyl kinase	Chromosome:1743316-1744120	804	71.8276	56.861	251.989	102.796	318.785	180.338
T303_09390	ABC transporter permease	Chromosome:1744240-1745830	1590	140.082	79.4574	447.491	142.811	515.222	219.548
T303_09395	3-dehydroquinate dehydratase	Chromosome:1745832-1746564	732	134.848	161.615	531.11	223.262	546.692	293.741
T303_09400	integral membrane protein	Chromosome:1746838-1747570	732	11.1073	12.2696	36.0611	30.2291	68.9639	83.3725
T303_09405	ATP-dependent helicase	Chromosome:1747921-1754885	6964	69.5932	60.9385	169.047	154.656	196.495	230.782
T303_09410	ATP-dependent helicase	Chromosome:1747921-1754885	6964	31.8725	31.0598	106.379	93.0134	123.471	117.137
T303_09415	hypothetical protein	Chromosome:1755375-1756071	696	12.9529	15.6273	356.27	65.0323	268.409	60.2819
T303_09420	DNA-binding protein	Chromosome:1756075-1756522	447	13.9247	21.315	588.312	66.765	442.215	66.3142
T303_09425	membrane protein	Chromosome:1756739-1757360	621	88.9244	113.449	32.0605	125.338	78.9531	129.274
T303_09430	hypothetical protein	Chromosome:1757468-1757579	111	684.247	1267.31	133.26	506.165	969.129	969.269
T303_09435	hisitidine kinase	Chromosome:1757821-1758688	867	111.803	135.919	40.7951	150.81	78.4397	117.03
T303_09445	haloacid dehalogenase	Chromosome:1758963-1760349	1386	218.901	314.674	180.703	420.195	261.813	202.34
T303_09450	asparaginase	Chromosome:1760464-1761388	924	57.1342	89.7754	33.8869	129.991	44.7684	70.9578
T303_09455	hypothetical protein	Chromosome:1761391-1761538	147	84.5292	118.235	35.5926	107.825	34.8707	112.247
T303_09460	ATP-dependent DNA helicase	Chromosome:1762156-1764175	2019	58.0132	69.0198	64.8347	86.9136	124.032	161.933
T303_09465	alanine racemase	Chromosome:1764303-1765407	1104	39.0996	41.7841	265.66	77.2851	254.112	123.408
T303_09470	4'-phosphopantetheinyl transferase	Chromosome:1765427-1765787	360	60.2618	76.2861	363.227	131.377	333.919	151.114
T303_09475	phospho-2-dehydro-3-deoxyheptonate aldolase	Chromosome:1765790-1766822	1032	58.8632	77.3128	324.719	131.098	292.059	126.913
T303_09480	phospho-2-dehydro-3-deoxyheptonate aldolase	Chromosome:1766919-1767951	1032	336.342	460.696	1201.22	774.483	1166.35	742.462
T303_09485	preprotein translocase subunit SecA	Chromosome:1767974-1770524	2550	245.41	303.958	952.33	523.174	900.321	463.139
T303_09495	mannose-6-phosphate isomerase	Chromosome:1771053-1772001	948	1747.75	1187.49	60.5272	366.989	49.4326	64.6132
T303_09500	fructokinase	Chromosome:1772066-1772960	894	3497.99	3040.94	385.008	1329.04	209.275	341.768
T303_09505	PTS sucrose transporter subunit IIABC	Chromosome:1773144-1775046	1902	10547.4	0	2686.66	17954.9	966.553	10358.6
T303_09510	sucrose-6-phosphate hydrolase	Chromosome:1775294-1776737	1443	636.951	600.287	328.255	624.539	154.87	348.493
T303_09515	sucrose operon repressor	Chromosome:1776745-1777711	966	1098.16	1657.41	351.484	1648.31	207.167	688.501
T303_09520	transcription antitermination factor NusB	Chromosome:1777800-1778659	859	898.691	1179.24	1837.71	1608.3	1720.3	1872.06
T303_09525	hypothetical protein	Chromosome:1777800-1778659	859	638.746	863.732	1395.95	1159.56	1265.23	1286.6
T303_09530	elongation factor P	Chromosome:1778687-1779248	561	1227.83	1526.04	2429.04	1923.43	1861.33	1825.3
T303_09535	Cytidine deaminase	Chromosome:1779360-1779831	471	564.048	554.871	281.595	687.291	190.434	475.844
T303_09540	X-Pro aminopeptidase	Chromosome:1779834-1780896	1062	404.999	352.784	200.151	467.037	129.845	203.366
T303_09545	membrane protein	Chromosome:1781084-1781513	429	4.29198	3.31629	4.65233	5.30626	7.64627	7.48627
T303_09555	hypothetical protein	Chromosome:1782696-1782888	192	27.2707	17.9405	18.4155	36.1226	26.0027	88.3853
T303_09560	membrane protein	Chromosome:1783049-1783322	273	25.5966	24.5429	10.211	24.8661	13.2192	99.881
T303_09565	uvrA; excinuclease ABC subunit A	Chromosome:1783415-1786241	2826	240.862	413.062	118.066	472.674	118.52	577.548
T303_09570	magnesium transporter	Chromosome:1786549-1787494	945	58.3956	51.0898	279.009	150.723	403.118	269.819
T303_09575	membrane protein	Chromosome:1787564-1788236	672	91.4462	76.1464	328.498	235.559	459.643	360.295
T303_09580	hypothetical protein	Chromosome:1788352-1789234	882	125.629	36.0398	74.9756	91.8714	128.767	150.667
T303_09585	30S ribosomal protein S18	Chromosome:1789360-1789600	240	737.992	1750.26	7989.23	2602.93	10227.1	3601.81
T303_09590	single-stranded DNA-binding protein	Chromosome:1789641-1790160	519	296.73	785.43	3655.23	1026.39	5028.32	1847.38
T303_09595	30S ribosomal protein S6	Chromosome:1790171-1790462	291	289.343	852.118	3620.7	1071.16	4824.19	1949.62
T303_09600	hypothetical protein	Chromosome:1790680-1791634	954	29.2647	429.289	24.6865	94.968	75.6403	163.053
T303_09605	adenine glycosylase	Chromosome:1792173-1793325	1152	52.8606	45.1736	32.0311	60.1526	61.5368	66.0904
T303_09610	hypothetical protein	Chromosome:1793420-1793546	126	182.896	174.52	67.7326	206.451	128.589	253.966
T303_09615	hypothetical protein	Chromosome:1793652-1794565	913	54.4945	81.2148	33.842	87.4458	28.1988	90.3838
T303_09620	hypothetical protein	Chromosome:1793652-1794565	913	130.161	94.6563	40.3836	411.472	68.2251	156.615
T303_09625	hypothetical protein	Chromosome:1793652-1794565	913	84.4093	105.024	29.8743	115.961	36.1674	108.565
T303_09630	hypothetical protein	Chromosome:1793652-1794565	913	51.5296	64.4	17.0633	84.3373	17.7521	66.7875
T303_09635	DNA polymerase I	Chromosome:1795152-1797792	2640	850.117	1342.95	308.092	1382.05	307.773	821.847
T303_09640	DNA mismatch repair protein MutS	Chromosome:1797998-1800350	2352	305.249	123.502	323.58	275.42	318.402	238.962
T303_09645	membrane ancor connecting MutS2 with cell-division Z-ring	Chromosome:1800450-1801307	857	112.461	98.9281	189.264	144.86	269.636	284.282
T303_09650	hypothetical protein	Chromosome:1800450-1801307	857	98.8407	89.7047	148.291	136.725	207.958	251.75
T303_09655	ribonuclease HIII	Chromosome:1801620-1802511	891	156.266	162.694	413.324	245.741	462.004	406.753
T303_09660	signal peptidase	Chromosome:1802529-1803153	624	176.392	225.154	397.754	301.723	472.845	519.714
T303_09665	ATP-dependent DNA helicase, RecD/TraA family	Chromosome:1803214-1805719	2505	37.1694	22.7015	51.8177	35.8567	83.6323	56.9954
T303_09670	branched-chain amino acid transporter	Chromosome:1805773-1806782	1009	160.239	42.6499	69.3221	51.9999	126.78	116.387
T303_09675	branched-chain amino acid ABC transporter permease	Chromosome:1805773-1806782	1009	83.7479	30.865	43.0317	34.558	73.1959	62.5351
T303_09680	glycoprotease family protein	Chromosome:1806833-1808948	2115	179.633	88.3602	137.885	150.253	215.121	181.633
T303_09685	alanine acetyltransferase	Chromosome:1806833-1808948	2115	165.45	93.6421	121.208	141.445	180.925	136.081
T303_09690	inactive metal-dependent protease-like protein, putative molecular chaperone	Chromosome:1806833-1808948	2115	161.811	84.1832	120.486	150.592	164.605	102.831
T303_09695	hypothetical protein	Chromosome:1809210-1809441	231	533.896	795.356	550.749	1028.43	478.464	130.591
T303_09700	mRNA degradation ribonuclease J1/J2, metallo-beta-lactamase superfamily enzyme	Chromosome:1809445-1811128	1683	856.36	1004.82	967.77	1378.12	894.022	344.382
T303_09705	hydrolase	Chromosome:1811363-1811744	381	174.767	87.1737	59.8638	69.3802	92.5497	63.7734
T303_09710	glutamine synthetase	Chromosome:1811956-1813327	1371	714.433	741.165	2225.86	1373.82	2218.77	2861.11
T303_09715	repressor of the glutamine synthetase, MerR family transcriptional regulator	Chromosome:1813348-1813723	375	1680.78	1658.04	3347.09	2548.16	3040.88	4419.16
T303_09720	membrane protein	Chromosome:1813895-1814399	504	28.7661	18.4788	219.926	42.8737	288.654	160.082
T303_09725	transposase	Chromosome:1814643-1814781	138	112.411	120.102	531.459	296.347	757.39	244.746
T303_09735	phosphoglycerate kinase	Chromosome:1815524-1816724	1200	1301.19	1185.96	3643.26	2140.16	3191.25	1621.95
T303_09740	transposase	Chromosome:1816979-1817228	249	114.758	194.646	7.66922	173.626	15.5077	539.644
T303_09750	transposase IS861	Chromosome:1817853-1818192	339	2.98155	5.60822	4.81136	6.11125	11.9786	8.9751
T303_09755	transposase	Chromosome:1818205-1818664	459	3.21297	3.99167	3.08828	5.58873	7.9925	7.69823
T303_09765	glyceraldehyde-3-phosphate dehydrogenase	Chromosome:1820065-1821103	1038	21890.9	12839.8	0	23292.1	15054.1	26363.1
T303_09770	fusA; elongation factor P	Chromosome:1821262-1823344	2082	3167.29	3418.53	2990.14	5589.87	3373.13	4794.67
T303_09775	30S ribosomal protein S7	Chromosome:1823564-1824035	471	533.534	681.841	4249.6	1254.92	5628.99	2596.19
T303_09780	30S ribosomal protein S12	Chromosome:1824053-1824467	414	487.198	764.007	3968.95	1212.58	5119	2213.65
T303_09785	purine operon repressor	Chromosome:1824683-1825508	825	119.135	40.9425	296.163	43.3198	272.233	70.6901
T303_09790	3'-5' exoribonuclease	Chromosome:1825601-1827807	2206	631.706	290.348	309.691	604.194	311.936	849.313
T303_09795	DNA polymerase V	Chromosome:1825601-1827807	2206	741.511	339.588	321.522	615.694	344.796	555.233
T303_09800	thiamine pyrophosphokinase	Chromosome:1827808-1829093	1285	590.205	241.748	281.03	445.167	284.809	277.539
T303_09805	ribulose-phosphate 3-epimerase	Chromosome:1827808-1829093	1285	1170.86	912.457	514.221	1605.04	467.818	1305.75
T303_09810	GTPase A	Chromosome:1829100-1829973	873	859.813	516.314	481.348	820.502	435.823	496.918
T303_09815	tRNA-Leu	Chromosome:1830108-1830191	83	0	0	0	0	0	0
T303_09820	16S rRNA methyltransferase	Chromosome:1830229-1831102	873	517.268	711.652	229.852	746.12	342.281	311.666
T303_09825	DNA primase	Chromosome:1831246-1832576	1330	418.966	388.783	219.475	484.483	352.812	261.364
T303_09830	TatD family hydrolase	Chromosome:1831246-1832576	1330	279.899	247.238	217.548	321.606	327.562	191.045
T303_09835	CoA-binding protein	Chromosome:1832629-1833082	453	606.407	231.726	1900.72	514.582	1181.18	1822.35
T303_09840	thioredoxin	Chromosome:1833120-1833435	315	440.63	207.509	1525.93	454.243	896.532	1554.57
T303_09845	Appr-1-p processing protein	Chromosome:1833630-1834413	783	126.806	30.3296	140.945	96.9894	72.7518	70.4808
T303_09855	bacteriocin transport accessory protein	Chromosome:1834873-1835209	336	101.916	30.5625	337.474	85.933	264.782	84.9977
T303_09860	tRNA-Asn	Chromosome:1835314-1835388	74	0	0	0	0	0	0
T303_09865	5S ribosomal RNA	Chromosome:1835393-1835509	116	0	0	0	0	0	0
T303_09870	23S ribosomal RNA	Chromosome:1835591-1838493	2902	0	0.0219683	0	0.0260876	0.00476246	0.0343169
T303_09875	tRNA-Ala	Chromosome:1838638-1838711	73	0	0	0	0	0	0
T303_09880	16S ribosomal RNA	Chromosome:1838762-1840309	1547	0	0	0	0	0	0
T303_09885	hypothetical protein	Chromosome:1840783-1840921	138	73.6171	91.2215	14.3192	62.4209	23.6185	96.2187
T303_09890	tgt; queuine tRNA-ribosyltransferase	Chromosome:1841032-1842175	1143	36.2269	44.4321	367.761	124.521	571.454	519.417
T303_09895	transposase IS200	Chromosome:1842429-1842711	282	65.7522	88.5293	22.8689	72.2575	71.6185	77.2294
T303_09900	50S ribosomal protein L34	Chromosome:1843080-1843215	135	1602.38	3090.53	4055.38	5539.69	4301.02	3649.96
T303_09905	transposase IS1193	Chromosome:1844132-1845461	1329	0	0	0	0	0	0
